# Supplementary material
Source: publisher figshare collection journal article supplement (https://acs.figshare.com/ndownloader/files/5455529)
Supplement: Supplementary file 1 [file 5455529]

data_r-3c
_audit_creation_date              2015-12-12
_audit_creation_method
;
Olex2 1.2
(compiled 2015.01.26 svn.r3150 for OlexSys, GUI svn.r4998)
;
_shelxl_version_number            2013-4
_publ_contact_author_address      ?
_publ_contact_author_email        ?
_publ_contact_author_name         ''
_publ_contact_author_phone        ?
_publ_section_references
;
Dolomanov, O.V., Bourhis, L.J., Gildea, R.J, Howard, J.A.K. & Puschmann, H.
 (2009), J. Appl. Cryst. 42, 339-341.

Sheldrick, G.M. (2008). Acta Cryst. A64, 112-122.
;
_chemical_name_common             ?
_chemical_name_systematic
;
 ?
;
_chemical_formula_moiety          '3(I), C33 O11 Ti3'
_chemical_formula_sum             'C33 I3 O11 Ti3'
_chemical_formula_weight          1096.73
_chemical_melting_point           ?
loop_
  _atom_type_symbol
  _atom_type_description
  _atom_type_scat_dispersion_real
  _atom_type_scat_dispersion_imag
  _atom_type_scat_source
 'C' 'C' 0.0033 0.0016 'International Tables Vol C Tables 4.2.6.8 and 6.1.1.4'
 'I' 'I' -0.4742 1.8119 'International Tables Vol C Tables 4.2.6.8 and 6.1.1.4'
 'O' 'O' 0.0106 0.0060 'International Tables Vol C Tables 4.2.6.8 and 6.1.1.4'
 'Ti' 'Ti' 0.2776 0.4457 'International Tables Vol C Tables 4.2.6.8 and 6.1.1.4'

_shelx_space_group_comment
;
The symmetry employed for this shelxl refinement is uniquely defined
by the following loop, which should always be used as a source of
symmetry information in preference to the above space-group names.
They are only intended as comments.
;
_space_group_crystal_system       'trigonal'
_space_group_IT_number            167
_space_group_name_H-M_alt         'R -3 c'
_space_group_name_Hall            '-R 3 2"c'
loop_
  _space_group_symop_operation_xyz
 'x, y, z'
 '-y, x-y, z'
 '-x+y, -x, z'
 'x-y, -y, -z+1/2'
 '-x, -x+y, -z+1/2'
 'y, x, -z+1/2'
 'x+2/3, y+1/3, z+1/3'
 '-y+2/3, x-y+1/3, z+1/3'
 '-x+y+2/3, -x+1/3, z+1/3'
 'x-y+2/3, -y+1/3, -z+5/6'
 '-x+2/3, -x+y+1/3, -z+5/6'
 'y+2/3, x+1/3, -z+5/6'
 'x+1/3, y+2/3, z+2/3'
 '-y+1/3, x-y+2/3, z+2/3'
 '-x+y+1/3, -x+2/3, z+2/3'
 'x-y+1/3, -y+2/3, -z+7/6'
 '-x+1/3, -x+y+2/3, -z+7/6'
 'y+1/3, x+2/3, -z+7/6'
 '-x, -y, -z'
 'y, -x+y, -z'
 'x-y, x, -z'
 '-x+y, y, z-1/2'
 'x, x-y, z-1/2'
 '-y, -x, z-1/2'
 '-x+2/3, -y+1/3, -z+1/3'
 'y+2/3, -x+y+1/3, -z+1/3'
 'x-y+2/3, x+1/3, -z+1/3'
 '-x+y+2/3, y+1/3, z-1/6'
 'x+2/3, x-y+1/3, z-1/6'
 '-y+2/3, -x+1/3, z-1/6'
 '-x+1/3, -y+2/3, -z+2/3'
 'y+1/3, -x+y+2/3, -z+2/3'
 'x-y+1/3, x+2/3, -z+2/3'
 '-x+y+1/3, y+2/3, z+1/6'
 'x+1/3, x-y+2/3, z+1/6'
 '-y+1/3, -x+2/3, z+1/6'

_cell_length_a                    13.102(2)
_cell_length_b                    13.102(2)
_cell_length_c                    49.573(16)
_cell_angle_alpha                 90
_cell_angle_beta                  90
_cell_angle_gamma                 120
_cell_volume                      7369(3)
_cell_formula_units_Z             6
_cell_measurement_reflns_used     1664
_cell_measurement_temperature     173.15
_cell_measurement_theta_max       23.03
_cell_measurement_theta_min       2.43
_shelx_estimated_absorpt_T_max    ?
_shelx_estimated_absorpt_T_min    ?
_exptl_absorpt_coefficient_mu     2.402
_exptl_absorpt_correction_T_max   ?
_exptl_absorpt_correction_T_min   ?
_exptl_absorpt_correction_type    'none'
_exptl_absorpt_process_details    ?
_exptl_crystal_colour             red
_exptl_crystal_colour_primary     red
_exptl_crystal_density_diffrn     1.483
_exptl_crystal_density_meas       .
_exptl_crystal_density_method     ?
_exptl_crystal_description        block
_exptl_crystal_F_000              3066
_exptl_crystal_size_max           ?
_exptl_crystal_size_mid           ?
_exptl_crystal_size_min           ?
_exptl_special_details
;
 ?
;
_exptl_transmission_factor_max    ?
_exptl_transmission_factor_min    ?
_diffrn_reflns_av_R_equivalents   0.0233
_diffrn_reflns_av_unetI/netI      0.0199
_diffrn_reflns_Laue_measured_fraction_full 0.998
_diffrn_reflns_Laue_measured_fraction_max 0.996
_diffrn_reflns_limit_h_max        16
_diffrn_reflns_limit_h_min        -14
_diffrn_reflns_limit_k_max        15
_diffrn_reflns_limit_k_min        -9
_diffrn_reflns_limit_l_max        35
_diffrn_reflns_limit_l_min        -64
_diffrn_reflns_number             8061
_diffrn_reflns_point_group_measured_fraction_full 0.998
_diffrn_reflns_point_group_measured_fraction_max 0.996
_diffrn_reflns_theta_full         25.242
_diffrn_reflns_theta_max          27.463
_diffrn_reflns_theta_min          2.434
_diffrn_ambient_temperature       173.15
_diffrn_detector_area_resol_mean  ?
_diffrn_measured_fraction_theta_full 0.998
_diffrn_measured_fraction_theta_max 0.996
_diffrn_measurement_device_type   'CCD area detector'
_diffrn_measurement_method        'phi and omega scans'
_diffrn_radiation_monochromator   'graphite'
_diffrn_radiation_type            MoK\a
_diffrn_radiation_wavelength      0.71073
_diffrn_source                    ?
_reflns_Friedel_coverage          0.000
_reflns_Friedel_fraction_full     .
_reflns_Friedel_fraction_max      .
_reflns_number_gt                 1203
_reflns_number_total              1873
_reflns_special_details
;
 Reflections were merged by SHELXL according to the crystal
 class for the calculation of statistics and refinement.
 
 _reflns_Friedel_fraction is defined as the number of unique
 Friedel pairs measured divided by the number that would be
 possible theoretically, ignoring centric projections and
 systematic absences.
;
_reflns_threshold_expression      'I > 2\s(I)'
_computing_cell_refinement        ?
_computing_data_collection        ?
_computing_data_reduction         ?
_computing_molecular_graphics     'Olex2 (Dolomanov et al., 2009)'
_computing_publication_material   'Olex2 (Dolomanov et al., 2009)'
_computing_structure_refinement   'ShelXL (Sheldrick, 2008)'
_computing_structure_solution     'ShelXS (Sheldrick, 2008)'
_refine_diff_density_max          1.836
_refine_diff_density_min          -2.214
_refine_diff_density_rms          0.138
_refine_ls_extinction_coef        .
_refine_ls_extinction_method      none
_refine_ls_goodness_of_fit_ref    1.078
_refine_ls_hydrogen_treatment     undef
_refine_ls_matrix_type            full
_refine_ls_number_parameters      85
_refine_ls_number_reflns          1873
_refine_ls_number_restraints      0
_refine_ls_R_factor_all           0.1395
_refine_ls_R_factor_gt            0.1035
_refine_ls_restrained_S_all       1.078
_refine_ls_shift/su_max           0.000
_refine_ls_shift/su_mean          0.000
_refine_ls_structure_factor_coef  Fsqd
_refine_ls_weighting_details
'w=1/[\s^2^(Fo^2^)+(0.1521P)^2^+96.9043P] where P=(Fo^2^+2Fc^2^)/3'
_refine_ls_weighting_scheme       calc
_refine_ls_wR_factor_gt           0.3112
_refine_ls_wR_factor_ref          0.3512
_refine_special_details
;
 ?
;
_olex2_refinement_description
;
1. Others
 Fixed Sof: C1(0.5) C6(0.66667)
;
_atom_sites_solution_hydrogens    .
_atom_sites_solution_primary      heavy
_atom_sites_solution_secondary    ?
loop_
  _atom_site_label
  _atom_site_type_symbol
  _atom_site_fract_x
  _atom_site_fract_y
  _atom_site_fract_z
  _atom_site_U_iso_or_equiv
  _atom_site_adp_type
  _atom_site_occupancy
  _atom_site_site_symmetry_order
  _atom_site_calc_flag
  _atom_site_refinement_flags_posn
  _atom_site_refinement_flags_adp
  _atom_site_refinement_flags_occupancy
  _atom_site_disorder_assembly
  _atom_site_disorder_group
 I2 I -0.6667 -0.3333 0.72676(8) 0.2176(19) Uani 1 3 d S T P . .
 I1 I -0.6667 -0.3333 0.6667 0.194(2) Uani 1 6 d S T P . .
 Ti1 Ti -0.3333 0.19906(14) 0.5833 0.0776(9) Uani 1 2 d S T P . .
 O2 O -0.3333 0.3333 0.55946(15) 0.0521(18) Uani 1 3 d S T P . .
 O3 O -0.3353(10) 0.1129(6) 0.61078(12) 0.130(4) Uani 1 1 d . . . . .
 O1 O -0.1666(6) 0.3333 0.5833 0.100(3) Uani 1 2 d S T P . .
 C1 C -0.0329(14) 0.3900(16) 0.5853(3) 0.075(4) Uani 0.5 1 d . . . . .
 C3 C -0.355(3) 0.0105(17) 0.6246(3) 0.216(12) Uani 1 1 d . . . . .
 C1AA C -0.4025(19) 0.0009(15) 0.6508(3) 0.171(7) Uani 1 1 d . . . . .
 C5 C -0.3333 0.3333 0.5306(2) 0.092(5) Uani 1 3 d S T P . .
 C4 C -0.256(3) -0.010(2) 0.6202(4) 0.248(14) Uani 1 1 d . . . . .
 C2 C -0.0165(15) 0.3276(17) 0.6096(4) 0.174(7) Uani 1 1 d . . . . .
 C6 C -0.413(3) 0.257(3) 0.5139(11) 0.27(2) Uani 0.6667 1 d . . . . .

loop_
  _atom_site_aniso_label
  _atom_site_aniso_U_11
  _atom_site_aniso_U_22
  _atom_site_aniso_U_33
  _atom_site_aniso_U_23
  _atom_site_aniso_U_13
  _atom_site_aniso_U_12
 I2 0.1038(11) 0.1038(11) 0.445(6) 0.000 0.000 0.0519(5)
 I1 0.0674(9) 0.0674(9) 0.448(6) 0.000 0.000 0.0337(4)
 Ti1 0.130(2) 0.0634(9) 0.0616(12) 0.0154(6) 0.0308(11) 0.0649(11)
 O2 0.053(3) 0.053(3) 0.050(4) 0.000 0.000 0.0265(14)
 O3 0.266(11) 0.092(5) 0.076(4) 0.033(3) 0.048(5) 0.124(7)
 O1 0.072(3) 0.177(10) 0.086(5) 0.047(6) 0.023(3) 0.089(5)
 C1 0.052(8) 0.090(11) 0.087(10) 0.007(9) 0.004(8) 0.039(8)
 C3 0.45(4) 0.173(16) 0.131(11) 0.082(11) 0.086(17) 0.23(2)
 C1AA 0.225(19) 0.145(13) 0.123(10) 0.077(10) 0.026(11) 0.077(13)
 C5 0.119(9) 0.119(9) 0.040(6) 0.000 0.000 0.059(4)
 C4 0.48(4) 0.26(2) 0.172(15) 0.113(16) 0.12(2) 0.31(3)
 C2 0.149(13) 0.24(2) 0.203(15) -0.010(14) -0.073(12) 0.147(14)
 C6 0.13(2) 0.15(3) 0.50(6) -0.16(3) -0.13(3) 0.046(18)

_geom_special_details
;
 All esds (except the esd in the dihedral angle between two l.s. planes)
 are estimated using the full covariance matrix.  The cell esds are taken
 into account individually in the estimation of esds in distances, angles
 and torsion angles; correlations between esds in cell parameters are only
 used when they are defined by crystal symmetry.  An approximate (isotropic)
 treatment of cell esds is used for estimating esds involving l.s. planes.
;
loop_
  _geom_bond_atom_site_label_1
  _geom_bond_atom_site_label_2
  _geom_bond_distance
  _geom_bond_site_symmetry_2
  _geom_bond_publ_flag
 I2 I1 2.979(4) . ?
 I1 I2 2.979(4) 25_346 ?
 Ti1 Ti1 3.047(3) 2_565 ?
 Ti1 Ti1 3.047(3) 3_455 ?
 Ti1 O2 2.120(4) 16 ?
 Ti1 O2 2.120(4) . ?
 Ti1 O3 1.760(6) 17_445 ?
 Ti1 O3 1.760(6) . ?
 Ti1 O1 2.006(5) 3_455 ?
 Ti1 O1 2.006(5) . ?
 O2 Ti1 2.120(4) 3_455 ?
 O2 Ti1 2.120(4) 2_565 ?
 O2 C5 1.430(14) . ?
 O3 C3 1.410(13) . ?
 O1 Ti1 2.006(5) 2_565 ?
 O1 C1 1.526(17) . ?
 O1 C1 1.526(17) 16 ?
 C1 C1 1.30(4) 16 ?
 C1 C2 1.53(2) . ?
 C1 C2 1.64(2) 16 ?
 C3 C1AA 1.42(2) . ?
 C3 C4 1.47(3) . ?
 C5 C6 1.31(3) 2_565 ?
 C5 C6 1.31(3) . ?
 C5 C6 1.31(3) 3_455 ?
 C2 C1 1.64(2) 16 ?
 C6 C6 1.76(5) 2_565 ?
 C6 C6 1.76(5) 3_455 ?

loop_
  _geom_angle_atom_site_label_1
  _geom_angle_atom_site_label_2
  _geom_angle_atom_site_label_3
  _geom_angle
  _geom_angle_site_symmetry_1
  _geom_angle_site_symmetry_3
  _geom_angle_publ_flag
 I2 I1 I2 180.0 . 25_346 ?
 Ti1 Ti1 Ti1 60.001(1) 3_455 2_565 ?
 O2 Ti1 Ti1 44.06(12) 16 2_565 ?
 O2 Ti1 Ti1 44.06(11) . 3_455 ?
 O2 Ti1 Ti1 44.06(12) . 2_565 ?
 O2 Ti1 Ti1 44.06(11) 16 3_455 ?
 O2 Ti1 O2 67.9(3) . 16 ?
 O3 Ti1 Ti1 122.9(3) 17_445 2_565 ?
 O3 Ti1 Ti1 123.8(3) . 2_565 ?
 O3 Ti1 Ti1 122.9(3) . 3_455 ?
 O3 Ti1 Ti1 123.8(3) 17_445 3_455 ?
 O3 Ti1 O2 163.3(3) 17_445 16 ?
 O3 Ti1 O2 95.4(3) 17_445 . ?
 O3 Ti1 O2 95.5(3) . 16 ?
 O3 Ti1 O2 163.3(3) . . ?
 O3 Ti1 O3 101.3(4) 17_445 . ?
 O3 Ti1 O1 102.9(4) 17_445 3_455 ?
 O3 Ti1 O1 102.9(4) . . ?
 O3 Ti1 O1 101.5(4) 17_445 . ?
 O3 Ti1 O1 101.5(4) . 3_455 ?
 O1 Ti1 Ti1 40.59(17) . 2_565 ?
 O1 Ti1 Ti1 100.59(17) . 3_455 ?
 O1 Ti1 Ti1 40.59(17) 3_455 3_455 ?
 O1 Ti1 Ti1 100.59(17) 3_455 2_565 ?
 O1 Ti1 O2 73.99(14) 3_455 . ?
 O1 Ti1 O2 73.99(14) . . ?
 O1 Ti1 O2 73.99(14) . 16 ?
 O1 Ti1 O2 74.00(14) 3_455 16 ?
 O1 Ti1 O1 141.2(3) . 3_455 ?
 Ti1 O2 Ti1 91.9(2) . 3_455 ?
 Ti1 O2 Ti1 91.9(2) 2_565 3_455 ?
 Ti1 O2 Ti1 91.9(2) . 2_565 ?
 C5 O2 Ti1 123.93(16) . . ?
 C5 O2 Ti1 123.93(16) . 3_455 ?
 C5 O2 Ti1 123.93(17) . 2_565 ?
 C3 O3 Ti1 157.3(10) . . ?
 Ti1 O1 Ti1 98.8(3) . 2_565 ?
 C1 O1 Ti1 155.3(7) 16 2_565 ?
 C1 O1 Ti1 105.6(7) 16 . ?
 C1 O1 Ti1 155.3(7) . . ?
 C1 O1 Ti1 105.6(7) . 2_565 ?
 C1 O1 C1 50.5(14) 16 . ?
 O1 C1 C2 103.0(12) . . ?
 O1 C1 C2 98.0(11) . 16 ?
 C1 C1 O1 64.8(7) 16 . ?
 C1 C1 C2 61.4(14) 16 16 ?
 C1 C1 C2 70.3(15) 16 . ?
 C2 C1 C2 110.8(16) . 16 ?
 O3 C3 C1AA 113.1(13) . . ?
 O3 C3 C4 110.2(18) . . ?
 C1AA C3 C4 120.5(17) . . ?
 C6 C5 O2 129(2) 2_565 . ?
 C6 C5 O2 129(2) 3_455 . ?
 C6 C5 O2 129(2) . . ?
 C6 C5 C6 85(4) . 2_565 ?
 C6 C5 C6 85(4) 2_565 3_455 ?
 C6 C5 C6 85(4) . 3_455 ?
 C1 C2 C1 48.4(13) . 16 ?
 C5 C6 C6 47.7(18) . 3_455 ?
 C5 C6 C6 47.7(18) . 2_565 ?
 C6 C6 C6 59.999(18) 3_455 2_565 ?

loop_
  _geom_torsion_atom_site_label_1
  _geom_torsion_atom_site_label_2
  _geom_torsion_atom_site_label_3
  _geom_torsion_atom_site_label_4
  _geom_torsion
  _geom_torsion_site_symmetry_1
  _geom_torsion_site_symmetry_2
  _geom_torsion_site_symmetry_3
  _geom_torsion_site_symmetry_4
  _geom_torsion_publ_flag
 Ti1 Ti1 O3 C3 120(3) 3_455 . . . ?
 Ti1 Ti1 O3 C3 -166(3) 2_565 . . . ?
 Ti1 O2 C5 C6 -178(2) . . . 3_455 ?
 Ti1 O2 C5 C6 62(2) 2_565 . . 2_565 ?
 Ti1 O2 C5 C6 62(2) 3_455 . . 3_455 ?
 Ti1 O2 C5 C6 62(2) . . . . ?
 Ti1 O2 C5 C6 -178(2) 3_455 . . 2_565 ?
 Ti1 O2 C5 C6 -178(2) 2_565 . . . ?
 Ti1 O2 C5 C6 -58(2) 2_565 . . 3_455 ?
 Ti1 O2 C5 C6 -58(2) 3_455 . . . ?
 Ti1 O2 C5 C6 -58(2) . . . 2_565 ?
 Ti1 O3 C3 C1AA -139(2) . . . . ?
 Ti1 O3 C3 C4 83(4) . . . . ?
 Ti1 O1 C1 C1 -173.1(12) 2_565 . . 16 ?
 Ti1 O1 C1 C1 16(3) . . . 16 ?
 Ti1 O1 C1 C2 126.4(11) 2_565 . . . ?
 Ti1 O1 C1 C2 69.2(19) . . . 16 ?
 Ti1 O1 C1 C2 -120.1(10) 2_565 . . 16 ?
 Ti1 O1 C1 C2 -44(2) . . . . ?
 O2 Ti1 O3 C3 155(3) . . . . ?
 O2 Ti1 O3 C3 157(3) 16 . . . ?
 O2 C5 C6 C6 -137.5(15) . . . 2_565 ?
 O2 C5 C6 C6 137.5(15) . . . 3_455 ?
 O3 Ti1 O3 C3 -23(3) 17_445 . . . ?
 O1 Ti1 O3 C3 83(3) 3_455 . . . ?
 O1 Ti1 O3 C3 -128(3) . . . . ?
 O1 C1 C2 C1 56.8(10) . . . 16 ?
 C1 O1 C1 C2 -60.6(14) 16 . . . ?
 C1 O1 C1 C2 53.0(13) 16 . . 16 ?
 C2 C1 C2 C1 -47.1(14) 16 . . 16 ?
 C6 C5 C6 C6 85(3) 3_455 . . 2_565 ?
 C6 C5 C6 C6 -85(3) 2_565 . . 3_455 ?

_shelx_res_file
;
TITL R-3C in R-3c #167
REM reset to R-3c #167
CELL 0.71073 13.1016 13.1016 49.5729 90 90 120
ZERR 6 0.002 0.002 0.0157 0 0 0
LATT 3
SYMM -Y,+X-Y,+Z
SYMM +Y-X,-X,+Z
SYMM -Y+X,-Y,0.5-Z
SYMM -X,-X+Y,0.5-Z
SYMM +Y,+X,0.5-Z
SFAC C I O Ti
UNIT 198 18 66 18

L.S. 40
PLAN  20
TEMP -100
BOND
MORE -1
BOND $H
CONF
fmap 2
acta
REM <olex2.extras>
REM <HklSrc "%.\\R-3C.hkl">
REM </olex2.extras>

WGHT    0.152100   96.904297
FVAR       0.02789
I2    2   -0.666667   -0.333333    0.726762    10.33333    0.10375    0.10375 =
         0.44520    0.00000    0.00000    0.05188
I1    2   -0.666667   -0.333333    0.666667    10.16667    0.06742    0.06742 =
         0.44786    0.00000    0.00000    0.03371
TI1   4   -0.333333    0.199060    0.583333    10.50000    0.12982    0.06345 =
         0.06160    0.01541    0.03082    0.06491
O2    3   -0.333333    0.333333    0.559461    10.33333    0.05301    0.05301 =
         0.05039    0.00000    0.00000    0.02651
O3    3   -0.335275    0.112866    0.610775    11.00000    0.26601    0.09237 =
         0.07620    0.03311    0.04795    0.12367
O1    3   -0.166562    0.333333    0.583333    10.50000    0.07191    0.17721 =
         0.08592    0.04676    0.02338    0.08860
C1    1   -0.032850    0.390025    0.585339    10.50000    0.05227    0.08987 =
         0.08655    0.00706    0.00389    0.03868
C3    1   -0.355017    0.010468    0.624571    11.00000    0.44855    0.17290 =
         0.13087    0.08166    0.08562    0.23269
C1AA  1   -0.402507    0.000884    0.650818    11.00000    0.22507    0.14473 =
         0.12270    0.07681    0.02639    0.07707
C5    1   -0.333333    0.333333    0.530611    10.33333    0.11866    0.11866 =
         0.04001    0.00000    0.00000    0.05933
C4    1   -0.255851   -0.010142    0.620205    11.00000    0.47548    0.26020 =
         0.17183    0.11322    0.12157    0.30604
C2    1   -0.016491    0.327604    0.609605    11.00000    0.14944    0.23714 =
         0.20309   -0.01004   -0.07342    0.14666
C6    1   -0.412796    0.257440    0.513948    10.66667    0.13062    0.15037 =
         0.49710   -0.16116   -0.12683    0.04625
HKLF 4

REM  R-3C in R-3c #167
REM R1 =  0.1035 for    1203 Fo > 4sig(Fo)  and  0.1395 for all    1873 data
REM     85 parameters refined using      0 restraints

END

WGHT      0.1521     96.9336

REM Highest difference peak  1.836,  deepest hole -2.214,  1-sigma level  0.138
Q1    1  -0.6667 -0.3333  0.7378  10.33333  0.05    1.84
Q2    1  -0.6667 -0.3333  0.6797  10.33333  0.05    0.99
Q3    1  -0.6838 -0.2955  0.7131  11.00000  0.05    0.80
Q4    1  -0.3333  0.3333  0.4807  10.33333  0.05    0.60
Q5    1  -0.2695  0.0848  0.6364  11.00000  0.05    0.49
Q6    1  -0.3333  0.3333  0.5420  10.33333  0.05    0.47
Q7    1   0.0084  0.3314  0.5985  11.00000  0.05    0.40
Q8    1  -0.4736  0.3114  0.5216  11.00000  0.05    0.38
Q9    1  -0.1627  0.3747  0.5901  11.00000  0.05    0.36
Q10   1  -0.2871  0.1639  0.6199  11.00000  0.05    0.34
Q11   1  -0.6667 -0.3333  0.7875  10.33333  0.05    0.33
Q12   1  -0.3586 -0.0673  0.6170  11.00000  0.05    0.33
Q13   1  -0.1996  0.0718  0.6380  11.00000  0.05    0.31
Q14   1  -0.3910 -0.0196  0.6255  11.00000  0.05    0.29
Q15   1  -0.1974  0.0024  0.6059  11.00000  0.05    0.29
Q16   1  -0.0767  0.2683  0.6125  11.00000  0.05    0.28
Q17   1  -0.3816  0.0985  0.6009  11.00000  0.05    0.27
Q18   1  -0.3839  0.2377  0.4683  11.00000  0.05    0.26
Q19   1  -0.3049  0.2450  0.5924  11.00000  0.05    0.25
Q20   1   0.0120  0.2650  0.6114  11.00000  0.05    0.25
;
_shelx_res_checksum               16875
_shelx_hkl_file
;
  -3   3   0 1000.00   12.94
   0   3   0  989.15   13.12
   2   2   0  169.16    2.24
  -2   4   0  165.43    2.20
   1   4   0  277.27    3.56
   1   4   0  275.33    3.64
  -4   5   0  274.18    3.63
  -5   4   0  267.19    3.60
  -1   5   0  271.77    3.51
  -1   5   0  262.81    3.43
   3   3   0  167.51    2.28
  -3   6   0  164.54    2.22
  -6   6   0  279.29    3.67
   0   6   0  277.74    3.58
   0   6   0  284.64    3.74
   2   5   0  170.79    2.24
   2   5   0  165.67    2.35
  -5   7   0  170.93    2.27
   5   2   0  165.11    2.30
  -2   7   0  165.43    2.26
   1   7   0  109.67    1.63
   1   7   0  109.22    1.48
  -7   8   0  108.57    1.53
   4   4   0   73.57    1.16
  -4   8   0   73.43    1.08
  -8   7   0  107.38    1.52
  -1   8   0  108.75    1.59
   3   6   0   64.32    0.97
   3   6   0   64.69    1.07
  -6   9   0   64.18    0.98
   6   3   0   63.26    1.06
  -3   9   0   63.74    1.00
   0   9   0   48.05    0.87
   2   8   0   34.50    0.70
   5   5   0   37.08    0.74
   5   5   0   38.48    0.69
  -5  10   0   38.20    0.66
   8   2   0   34.06    0.70
  -2  10   0   34.26    0.66
   1  10   0    5.21    0.26
   4   7   0   10.30    0.35
   7   4   0    9.94    0.35
  -4  11   0   10.18    0.30
  10   1   0    5.76    0.28
  -1  11   0    5.51    0.26
   3   9   0    9.33    0.36
   6   6   0   11.36    0.34
   6   6   0   11.13    0.39
   9   3   0    9.61    0.37
  -3  12   0    9.16    0.32
  12   0   0    3.18    0.24
   0  12   0    3.01    0.22
   2  11   0    4.54    0.28
   5   8   0   10.54    0.40
   8   5   0   11.32    0.42
   8   5   0   11.52    0.38
  11   2   0    4.77    0.29
  -2  13   0    4.31    0.25
   1  13   0    1.97    0.23
  14  -1   0    2.05    0.23
   4  10   0    4.84    0.30
   7   7   0    7.70    0.36
  10   4   0    5.16    0.31
  10   4   0    5.13    0.29
  13   1   0    2.40    0.25
  -1  14   0    1.73    0.21
   3  12   0    2.44    0.25
   6   9   0    3.57    0.28
   9   6   0    4.01    0.29
  12   3   0    2.67    0.27
  12   3   0    2.75    0.27
   5  11   0    0.94    0.19
   8   8   0    1.25    0.20
  11   5   0    1.29    0.22
  11   5   0    0.96    0.19
  -1   3  -1   16.08    0.27
   0   2   1   -0.12    0.02
  -2   5  -1   11.12    0.23
   1   2  -1   16.01    0.28
   1   2  -1   15.93    0.26
  -2   3   1   15.84    0.25
  -3   4  -1    4.08    0.11
   1   3   1    4.17    0.13
  -3   7  -1    0.39    0.07
   4   3   1    0.55    0.08
   0   4  -1    0.07    0.02
   0   4  -1   -0.01    0.03
  -4   4   1   -0.01    0.02
  -4   3  -1    4.13    0.12
  -1   4   1    4.15    0.12
  -4   6  -1    2.19    0.10
   2   4   1    2.01    0.09
   2   4   1    2.08    0.11
  -4   9  -1    3.69    0.17
   5   4   1    3.98    0.20
  -1   6  -1    0.65    0.08
  -1   6  -1    0.53    0.04
  -6   5   1    0.64    0.06
   2   3  -1   11.32    0.23
   2   3  -1   11.04    0.25
  -3   5   1   11.46    0.22
  -5   5  -1   -0.01    0.03
   0   5   1    0.00    0.02
   0   5   1   -0.04    0.03
  -5   8  -1   -0.01    0.04
   3   5   1   -0.01    0.04
   3   5   1    0.08    0.06
  -5  11  -1    3.05    0.17
   6   5   1    2.85    0.20
   6   5   1    3.47    0.18
  -2   8  -1    0.14    0.06
   1   5  -1    0.63    0.08
   1   5  -1    0.65    0.06
  -5   6   1    0.61    0.06
   4   2  -1    2.25    0.12
  -2   6   1    2.15    0.10
  -6   7  -1    0.52    0.07
   1   6   1    0.44    0.05
   1   6   1    0.45    0.08
  -6  10  -1    6.16    0.21
   4   6   1    6.85    0.27
   4   6   1    6.81    0.22
   7   6   1    0.45    0.11
   7   6   1    0.78    0.15
  -3  10  -1    4.64    0.21
   7   3   1    4.70    0.23
   0   7  -1   -0.04    0.05
   0   7  -1    0.00    0.03
  -7   7   1    0.01    0.04
   3   4  -1    0.48    0.06
   3   4  -1    0.39    0.08
  -4   7   1    0.52    0.06
  -7   6  -1    0.38    0.06
  -1   7   1    0.44    0.04
  -1   7   1    0.30    0.06
  -7   9  -1    1.24    0.11
   2   7   1    1.22    0.09
   2   7   1    1.20    0.14
   5   7   1    0.46    0.11
   8   7   1    0.00    0.11
  -4  12  -1    1.18    0.14
   8   4   1    1.36    0.17
  -1   9  -1    0.63    0.10
   2   6  -1    0.24    0.07
   2   6  -1    0.14    0.05
  -6   8   1    0.12    0.05
   5   3  -1    0.04    0.06
  -3   8   1    0.01    0.04
  -8   8  -1   -0.05    0.04
   0   8   1   -0.03    0.06
   3   8   1    0.32    0.10
   6   8   1   -0.01    0.10
   9   5   1    0.22    0.11
   9   5   1    0.40    0.14
  -2  11  -1    0.00    0.07
   9   2   1    0.10    0.08
   1   8  -1    0.65    0.11
   4   5  -1    3.52    0.16
   4   5  -1    3.98    0.20
  -5   9   1    3.48    0.15
   7   2  -1    1.14    0.13
  -2   9   1    1.46    0.13
   1   9   1    0.19    0.08
   4   9   1    1.48    0.19
   7   9   1   -0.03    0.10
  10   6   1    0.11    0.12
  -3  13  -1    0.96    0.15
  10   3   1    1.03    0.16
   0  10  -1    0.00    0.07
   3   7  -1    4.43    0.17
   3   7  -1    4.43    0.22
   6   4  -1    6.83    0.28
  -4  10   1    6.66    0.23
   9   1  -1    0.24    0.08
  -1  10   1    0.21    0.09
   2  10   1    1.25    0.17
   5  10   1    0.02    0.10
  11   4   1   -0.05    0.10
  11   4   1   -0.01    0.11
  -1  12  -1    0.15    0.10
  11   1   1    0.33    0.12
   2   9  -1    0.08    0.07
   5   6  -1    3.38    0.21
   5   6  -1    3.25    0.18
   8   3  -1    0.34    0.11
  -3  11   1    0.21    0.08
  11   0  -1    0.28    0.10
   0  11   1    0.22    0.10
   3  11   1    0.09    0.10
  12   2   1    0.06    0.11
   1  11  -1    0.18    0.11
   4   8  -1    1.33    0.18
   7   5  -1    0.40    0.10
   7   5  -1    0.45    0.12
  10   2  -1    1.21    0.17
  -2  12   1    0.96    0.14
  13  -1  -1    0.03    0.10
   1  12   1    0.10    0.10
   4  12   1   -0.11    0.11
   0  13  -1    0.04    0.10
  13   0   1    0.08    0.11
   3  10  -1    1.12    0.18
   6   7  -1    0.64    0.14
   9   4  -1    1.95    0.22
   9   4  -1    1.41    0.17
  12   1  -1    0.10    0.12
  -1  13   1   -0.01    0.09
   2  13   1    0.27    0.14
  14   1   1    0.10    0.14
   2  12  -1   -0.09    0.09
  14  -2   1    0.05    0.10
   5   9  -1    0.21    0.12
   8   6  -1    0.14    0.12
   8   6  -1   -0.04    0.08
  11   3  -1    0.26    0.13
  11   3  -1    0.12    0.11
  14   0  -1    0.01    0.12
   0  14   1   -0.03    0.11
   1  14  -1    0.11    0.13
  15  -1   1    0.05    0.13
   4  11  -1   -0.01    0.10
   7   8  -1   -0.16    0.08
  10   5  -1    0.13    0.13
  10   5  -1    0.16    0.13
  13   2  -1    0.29    0.14
  13   2  -1    0.22    0.13
   6  10  -1    0.13    0.13
   9   7  -1    0.01    0.12
  12   4  -1    0.14    0.14
  12   4  -1    0.02    0.13
   0   2  -2  211.99    2.87
  -2   3  -2  291.92    3.94
  -1   4  -2  228.22    3.00
  -1   4  -2  228.63    2.95
  -3   2  -2  293.67    4.01
   2   1  -2  301.82    4.02
  -1   3   2  297.50    3.95
  -3   5  -2  227.29    2.98
   2   3   2  226.21    3.02
  -2   6  -2  106.51    1.49
  -2   6  -2  107.14    1.40
   1   3  -2  226.50    2.97
   1   3  -2  233.76    3.02
  -3   4   2  225.41    3.03
  -4   4  -2  109.46    1.50
   0   4   2  112.27    1.43
   0   4   2  110.42    1.52
  -4   7  -2   84.61    1.22
   3   4   2   85.03    1.27
  -3   8  -2   40.14    0.68
   5   3   2   40.39    0.73
   0   5  -2   44.47    0.71
   0   5  -2   44.69    0.64
  -5   5   2   45.81    0.66
   3   2  -2  233.74    3.10
  -2   5   2  232.41    3.05
  -5   6  -2   44.13    0.68
   1   5   2   43.63    0.72
   1   5   2   43.86    0.63
  -5   9  -2   31.85    0.57
   4   5   2   31.73    0.57
   4   5   2   31.91    0.64
  -4  10  -2   19.95    0.44
   6   4   2   19.86    0.49
  -1   7  -2   16.94    0.28
  -1   7  -2   16.20    0.36
  -7   6   2   16.43    0.31
   2   4  -2  106.51    1.53
   2   4  -2  106.21    1.46
  -4   6   2  108.01    1.45
  -6   5  -2   43.53    0.68
  -1   6   2   43.04    0.59
  -1   6   2   43.32    0.69
  -6   8  -2   21.22    0.41
   2   6   2   21.14    0.46
   2   6   2   21.39    0.38
   5   6   2   17.41    0.48
   5   6   2   17.94    0.42
   7   5   2    8.37    0.34
   7   5   2    8.75    0.30
  -2   9  -2   10.50    0.30
   1   6  -2   16.40    0.39
   1   6  -2   16.52    0.32
  -6   7   2   20.58    0.34
   4   3  -2   83.46    1.26
  -3   7   2   82.83    1.19
  -7   7  -2    8.95    0.23
   0   7   2    9.03    0.18
   0   7   2    8.94    0.26
   3   7   2   16.59    0.44
   6   7   2    1.62    0.20
   8   6   2    0.39    0.13
  -3  11  -2   14.03    0.39
   8   3   2   13.86    0.42
   0   8  -2    8.28    0.27
   3   5  -2   40.12    0.66
   3   5  -2   40.67    0.73
  -5   8   2   39.73    0.64
   6   2  -2   21.14    0.46
  -2   8   2   21.37    0.43
   1   8   2    8.36    0.29
   4   8   2    8.14    0.33
   7   8   2    0.11    0.11
   9   7   2    0.40    0.15
   9   4   2    1.66    0.20
  -1  10  -2    7.99    0.29
   2   7  -2   10.18    0.32
   2   7  -2   10.18    0.25
   5   4  -2   32.37    0.60
   5   4  -2   32.22    0.64
  -4   9   2   31.66    0.56
   8   1  -2    8.16    0.29
  -1   9   2    8.15    0.27
   2   9   2   10.54    0.36
   5   9   2    0.69    0.15
  10   5   2    0.49    0.15
  10   5   2    0.35    0.15
  -2  12  -2    5.06    0.25
  10   2   2    4.91    0.28
   1   9  -2    7.73    0.29
   4   6  -2   19.51    0.49
   4   6  -2   20.70    0.43
   7   3  -2   16.21    0.44
  -3  10   2   16.85    0.39
  10   0  -2   12.18    0.38
   0  10   2   12.19    0.37
   3  10   2    1.90    0.20
   6  10   2    0.31    0.14
  11   3   2    0.56    0.16
   0  11  -2   11.91    0.40
   3   8  -2   13.15    0.40
   6   5  -2   18.39    0.49
   6   5  -2   18.66    0.45
   9   2  -2   10.48    0.36
  -2  11   2    9.93    0.32
  12  -1  -2    6.11    0.30
   1  11   2    6.08    0.29
   4  11   2    0.57    0.16
  12   4   2    0.07    0.13
  12   4   2    0.23    0.14
  -1  13  -2    1.52    0.19
  12   1   2    1.68    0.21
   2  10  -2    5.63    0.29
   5   7  -2    8.20    0.33
   8   4  -2    8.14    0.31
   8   4  -2    8.28    0.34
  11   1  -2    6.13    0.31
  -1  12   2    5.82    0.28
  14  -2  -2    0.39    0.13
   2  12   2    0.28    0.13
  13   2   2    0.09    0.13
   1  12  -2    1.68    0.20
  13  -1   2    1.49    0.19
   4   9  -2    1.56    0.19
   7   6  -2    1.34    0.18
   7   6  -2    1.56    0.17
  10   3  -2    2.47    0.24
  10   3  -2    1.96    0.20
  13   0  -2    1.26    0.19
   0  13   2    1.06    0.17
   0  14  -2    0.32    0.13
  14   0   2    0.05    0.14
   3  11  -2    0.44    0.13
   6   8  -2    0.45    0.13
   9   5  -2    0.50    0.13
   9   5  -2    0.63    0.16
  12   2  -2    0.57    0.15
  15  -1  -2    0.26    0.15
   1  14   2    0.00    0.12
   2  13  -2    0.05    0.12
  15  -2   2    0.16    0.13
   5  10  -2    0.27    0.13
   8   7  -2    0.22    0.13
  11   4  -2    0.32    0.14
  11   4  -2    0.33    0.14
  14   1  -2    0.19    0.13
  14   1  -2    0.17    0.14
   4  12  -2    0.22    0.14
   7   9  -2    0.35    0.14
  10   6  -2    0.59    0.16
  -1   2  -3   19.68    0.30
   1   1  -3   20.20    0.30
   1   1  -3   19.62    0.31
  -2   1  -3   19.64    0.31
  -2   4  -3   46.11    0.68
   0   3  -3   -0.05    0.03
   0   3  -3   -0.03    0.02
  -3   3  -3   -0.04    0.02
   0   3   3    0.03    0.03
  -3   6  -3    0.58    0.07
  -1   5  -3    0.45    0.04
  -1   5  -3    0.39    0.06
   2   2  -3   46.58    0.71
   2   2  -3   47.71    0.69
  -2   4   3   48.12    0.67
  -4   5  -3    0.60    0.06
   1   4   3    0.71    0.07
  -4   8  -3    0.05    0.05
   4   4   3    0.01    0.06
  -2   7  -3    6.82    0.15
  -2   7  -3    6.67    0.21
   1   4  -3    0.32    0.04
   1   4  -3    0.50    0.07
  -4   5   3    0.48    0.04
  -5   4  -3    0.71    0.07
   4   1  -3    0.56    0.06
  -1   5   3    0.65    0.06
  -5   7  -3    5.31    0.17
   2   5   3    5.36    0.20
   2   5   3    5.33    0.15
  -5  10  -3    4.45    0.19
   5   5   3    4.64    0.23
  -3   9  -3    2.68    0.16
   6   3   3    3.02    0.18
   0   6  -3   -0.05    0.05
   0   6  -3    0.00    0.03
  -6   6   3    0.01    0.03
   3   3  -3    0.73    0.08
   3   3  -3    0.36    0.05
  -3   6   3    0.42    0.05
  -6   6  -3   -0.01    0.03
   0   6   3    0.02    0.02
   0   6   3    0.06    0.04
  -6   9  -3    1.84    0.12
   3   6   3    1.86    0.11
   3   6   3    2.21    0.16
   6   6   3    0.09    0.08
   6   6   3    0.22    0.10
  -4  11  -3    1.47    0.15
   7   4   3    1.19    0.15
  -1   8  -3    0.44    0.09
   2   5  -3    6.96    0.23
   2   5  -3    6.61    0.18
  -5   7   3    7.13    0.17
  -7   5  -3    5.56    0.18
   5   2  -3    5.43    0.20
  -2   7   3    5.46    0.17
  -7   8  -3   -0.01    0.05
   1   7   3    0.10    0.06
   4   7   3    1.35    0.16
   7   7   3    0.10    0.11
   8   5   3    2.09    0.22
  -2  10  -3    0.50    0.10
   1   7  -3    0.33    0.09
   1   7  -3    0.25    0.06
   4   4  -3    0.00    0.05
   4   4  -3    0.06    0.04
  -4   8   3    0.14    0.05
  -8   7  -3    0.08    0.05
   7   1  -3    0.07    0.05
  -1   8   3    0.09    0.05
   2   8   3    0.98    0.13
   5   8   3    1.53    0.19
   8   8   3    0.04    0.11
   9   6   3    0.09    0.11
  -3  12  -3    1.74    0.18
   9   3   3    1.97    0.21
   0   9  -3   -0.10    0.07
   3   6  -3    2.59    0.13
   3   6  -3    2.56    0.17
   6   3  -3    1.78    0.14
  -3   9   3    2.12    0.13
   9   0  -3    0.08    0.07
   0   9   3   -0.03    0.06
   3   9   3    1.90    0.20
   6   9   3    0.11    0.11
  10   4   3    0.30    0.13
  -1  11  -3    0.06    0.08
   2   8  -3    0.41    0.10
   5   5  -3    4.41    0.20
   5   5  -3    4.80    0.23
  -5  10   3    4.69    0.18
   8   2  -3    0.95    0.13
  -2  10   3    0.99    0.12
  11  -1  -3    0.06    0.08
   1  10   3    0.09    0.09
   4  10   3    0.22    0.12
  11   5   3    0.00    0.12
  -2  13  -3    0.45    0.12
  11   2   3    0.62    0.15
   1  10  -3    0.11    0.08
   4   7  -3    1.54    0.13
   4   7  -3    1.19    0.15
   7   4  -3    1.15    0.13
   7   4  -3    1.19    0.16
  -4  11   3    1.28    0.13
  10   1  -3    0.06    0.08
  -1  11   3    0.16    0.09
  13  -2  -3    0.57    0.13
   2  11   3    0.49    0.13
   5  11   3    0.12    0.12
  12   3   3   -0.03    0.11
   0  12  -3    0.15    0.10
  12   0   3    0.00    0.09
   3   9  -3    1.27    0.16
   6   6  -3    0.14    0.08
   6   6  -3    0.05    0.09
   9   3  -3    1.93    0.21
  -3  12   3    1.64    0.16
  12   0  -3    0.02    0.10
   0  12   3   -0.02    0.09
   3  12   3    0.09    0.12
  -1  14  -3    0.07    0.11
  13   1   3   -0.06    0.11
   2  11  -3    0.55    0.14
   5   8  -3    1.54    0.19
   8   5  -3    1.48    0.18
   8   5  -3    1.42    0.19
  11   2  -3    0.62    0.15
  14  -1  -3   -0.05    0.10
   1  13   3    0.05    0.11
   1  13  -3    0.04    0.11
  14  -1   3    0.03    0.11
   4  10  -3    0.34    0.13
   7   7  -3    0.08    0.11
  10   4  -3    0.18    0.12
  10   4  -3    0.29    0.13
  13   1  -3    0.04    0.11
   3  12  -3    0.02    0.11
   6   9  -3   -0.03    0.10
   9   6  -3    0.04    0.11
  12   3  -3   -0.04    0.11
  12   3  -3    0.01    0.12
   5  11  -3   -0.11    0.11
   8   8  -3   -0.02    0.11
  11   5  -3    0.05    0.13
  11   5  -3   -0.03    0.12
  -1   0  -4  456.73    6.15
  -1   3  -4   46.62    0.69
  -1   3  -4   48.82    0.65
   2   0  -4   79.83    1.07
  -2   2  -4   79.93    1.08
  -2   5  -4    6.27    0.17
  -2   5  -4    6.22    0.14
   1   2  -4   48.88    0.68
   1   2  -4   48.91    0.71
  -3   4  -4   38.23    0.58
   1   3   4   38.60    0.59
  -3   7  -4   18.25    0.37
   0   4  -4   49.61    0.75
   0   4  -4   48.27    0.68
   3   1  -4   38.98    0.60
  -4   3  -4   37.84    0.59
  -1   4   4   39.28    0.57
  -4   6  -4   31.77    0.53
   2   4   4   32.29    0.56
  -4   9  -4    8.09    0.25
   5   4   4    7.85    0.27
  -1   6  -4   65.34    0.90
  -1   6  -4   65.28    0.99
   2   3  -4    6.36    0.18
   2   3  -4    6.35    0.16
  -3   5   4    6.33    0.14
  -5   5  -4   47.07    0.72
   0   5   4   47.32    0.64
   0   5   4   47.25    0.73
  -5   8  -4   14.23    0.32
   3   5   4   13.59    0.35
  -5  11  -4    1.87    0.15
   6   5   4    1.80    0.18
  -2   8  -4   33.39    0.51
  -2   8  -4   33.78    0.61
   1   5  -4   67.39    1.03
   1   5  -4   66.52    0.95
  -5   6   4   68.44    0.94
  -6   4  -4   31.91    0.55
   4   2  -4   32.93    0.57
  -2   6   4   32.38    0.52
  -6   7  -4   74.96    1.10
   1   6   4   74.41    1.14
   1   6   4   74.02    1.02
  -6  10  -4    5.57    0.21
   4   6   4    5.52    0.24
   4   6   4    5.09    0.19
   7   6   4    4.13    0.26
  -3  10  -4    5.70    0.23
   7   3   4    5.59    0.25
   0   7  -4   55.06    0.79
   0   7  -4   55.31    0.91
  -7   7   4   54.29    0.79
   3   4  -4   18.05    0.40
   3   4  -4   18.90    0.37
  -4   7   4   19.64    0.34
   6   1  -4   74.43    1.13
  -7   6  -4   70.91    1.09
  -1   7   4   74.03    1.10
  -7   9  -4   20.90    0.43
   2   7   4   21.51    0.48
   5   7   4    1.85    0.19
   8   7   4    1.96    0.24
  -4  12  -4    1.44    0.15
   8   4   4    1.26    0.17
  -1   9  -4   19.03    0.45
   2   6  -4   33.58    0.56
   2   6  -4   32.67    0.63
  -6   8   4   32.89    0.53
   5   3  -4   13.96    0.34
   5   3  -4   14.08    0.36
  -3   8   4   14.12    0.31
  -8   8  -4   22.62    0.46
   8   0  -4   24.22    0.51
   0   8   4   24.60    0.50
   3   8   4    1.20    0.14
   6   8   4    2.85    0.24
   9   5   4    2.12    0.23
  -2  11  -4    1.89    0.17
   9   2   4    1.90    0.19
   1   8  -4   18.65    0.46
   4   5  -4    7.97    0.28
   4   5  -4    8.07    0.24
  -5   9   4    8.09    0.21
  -9   7  -4   20.63    0.43
   7   2  -4   21.72    0.49
  -2   9   4   21.93    0.45
  10  -1  -4    6.81    0.26
   1   9   4    7.21    0.28
   4   9   4    2.61    0.22
   7   9   4    0.35    0.14
  10   6   4    0.37    0.15
  -3  13  -4    1.60    0.18
  10   3   4    1.47    0.19
   0  10  -4    1.43    0.16
   3   7  -4    5.46    0.20
   3   7  -4    5.69    0.25
   6   4  -4    5.68    0.23
   6   4  -4    5.67    0.25
  -4  10   4    5.67    0.21
   9   1  -4    6.94    0.28
  -1  10   4    7.04    0.26
  12  -2  -4    1.35    0.16
   2  10   4    1.52    0.18
   5  10   4    1.26    0.21
  11   4   4    1.00    0.18
  -1  12  -4    0.23    0.11
  11   1   4    0.51    0.13
   2   9  -4    1.68    0.18
   5   6  -4    1.91    0.18
   5   6  -4    1.92    0.15
   8   3  -4    1.61    0.17
   8   3  -4    1.12    0.14
  -3  11   4    1.58    0.13
  11   0  -4    0.01    0.09
   0  11   4   -0.03    0.07
   3  11   4    1.29    0.20
  -2  14  -4    1.18    0.19
  12   2   4    0.93    0.18
   1  11  -4    0.17    0.10
   4   8  -4    1.85    0.20
   7   5  -4    1.95    0.19
   7   5  -4    1.58    0.16
  10   2  -4    1.46    0.18
  -2  12   4    1.16    0.14
  13  -1  -4    0.97    0.16
   1  12   4    0.86    0.16
   4  12   4    0.33    0.15
   0  13  -4    0.43    0.13
  13   0   4    0.65    0.16
   3  10  -4    1.61    0.20
   6   7  -4    4.04    0.26
   9   4  -4    2.89    0.26
   9   4  -4    2.68    0.22
  12   1  -4    1.12    0.18
  -1  13   4    1.11    0.16
   2  13   4    0.90    0.18
  -1  15  -4    0.27    0.15
  14   1   4    0.47    0.16
   2  12  -4    1.24    0.20
   5   9  -4    1.94    0.22
   8   6  -4    2.54    0.21
   8   6  -4    3.03    0.25
  11   3  -4    1.69    0.21
  11   3  -4    1.47    0.20
  14   0  -4    0.71    0.16
   0  14   4    0.41    0.15
   1  14  -4    0.57    0.17
  15  -1   4    0.42    0.16
   4  11  -4    1.02    0.18
   7   8  -4    1.49    0.21
  10   5  -4    1.36    0.20
  10   5  -4    1.30    0.21
  13   2  -4    0.93    0.19
  13   2  -4    0.91    0.19
   6  10  -4    0.41    0.16
   9   7  -4    0.42    0.15
  12   4  -4    0.54    0.18
  12   4  -4    0.28    0.16
  -1   1  -5   -0.06    0.02
   1   0  -5    0.06    0.02
  -1   1  -5   -0.05    0.01
   0   2  -5   -0.02    0.01
   0   2  -5    0.00    0.01
   3  -1  -5    3.98    0.09
  -2   3  -5    3.79    0.11
  -1   4  -5   45.06    0.63
  -1   4  -5   45.42    0.68
   2   1  -5    4.04    0.11
  -3   2  -5    4.04    0.12
   2   1  -5    3.92    0.11
  -1   3   5    4.04    0.09
  -3   5  -5   11.97    0.25
  -2   6  -5    0.06    0.03
  -2   6  -5    0.05    0.04
   1   3  -5   45.51    0.66
   1   3  -5   46.18    0.70
  -4   4  -5   -0.02    0.03
   4   0  -5   -0.03    0.02
   0   4   5   -0.05    0.02
  -4   7  -5    5.01    0.17
   3   4   5    4.76    0.18
  -3   8  -5    0.28    0.07
   0   5  -5    0.00    0.02
   0   5  -5   -0.04    0.03
  -5   5   5    0.02    0.02
   3   2  -5   12.30    0.26
   3   2  -5   12.06    0.27
  -5   3  -5   12.50    0.27
  -2   5   5   11.81    0.23
  -5   6  -5    2.26    0.11
   1   5   5    2.24    0.12
   1   5   5    2.30    0.08
  -5   9  -5    2.63    0.14
   4   5   5    2.63    0.17
  -4  10  -5    4.56    0.20
   6   4   5    4.50    0.22
  -1   7  -5    4.69    0.18
  -1   7  -5    4.51    0.13
   2   4  -5    0.04    0.04
   2   4  -5    0.05    0.05
  -4   6   5    0.09    0.03
   5   1  -5    2.56    0.13
  -6   5  -5    2.51    0.12
  -1   6   5    2.53    0.11
  -6   8  -5    0.06    0.05
   2   6   5    0.02    0.05
   2   6   5    0.00    0.04
  -6  11  -5    1.57    0.14
   5   6   5    1.60    0.17
   5   6   5    1.51    0.13
  -5  12  -5    0.36    0.09
   7   5   5    0.34    0.10
  -2   9  -5    3.29    0.17
   1   6  -5    4.91    0.19
   1   6  -5    4.64    0.15
  -6   7   5    4.75    0.13
   4   3  -5    5.20    0.18
   4   3  -5    4.92    0.19
  -3   7   5    5.46    0.16
   7   0  -5    0.00    0.04
  -7   7  -5   -0.03    0.04
   0   7   5   -0.01    0.04
  -7  10  -5    3.34    0.17
   3   7   5    3.58    0.20
   6   7   5    0.27    0.11
   8   6   5    0.19    0.11
  -3  11  -5   -0.05    0.06
   8   3   5    0.04    0.07
   0   8  -5    0.00    0.05
   3   5  -5    0.26    0.06
   3   5  -5    0.31    0.08
  -5   8   5    0.53    0.06
   6   2  -5   -0.02    0.06
  -8   6  -5    0.04    0.05
  -2   8   5    0.08    0.05
  -8   9  -5    0.01    0.05
   9  -1  -5   -0.05    0.05
   1   8   5    0.15    0.07
   4   8   5    1.01    0.15
   7   8   5    0.15    0.11
   9   7   5    0.04    0.11
  -4  13  -5    0.96    0.14
   9   4   5    1.35    0.18
  -1  10  -5   -0.07    0.06
   2   7  -5    3.43    0.19
   2   7  -5    3.27    0.14
   5   4  -5    2.41    0.14
   5   4  -5    2.55    0.17
  -4   9   5    2.72    0.13
   8   1  -5    0.08    0.06
  -9   8  -5    0.15    0.06
  -1   9   5   -0.01    0.05
  11  -2  -5    0.09    0.07
   2   9   5    0.06    0.08
   5   9   5   -0.10    0.09
  10   5   5    0.05    0.10
  -2  12  -5    0.43    0.12
  10   2   5    0.56    0.14
   1   9  -5    0.01    0.07
   4   6  -5    4.97    0.24
   4   6  -5    5.07    0.20
   7   3  -5    3.87    0.21
   7   3  -5    3.83    0.20
  -3  10   5    3.33    0.16
  10   0  -5   -0.05    0.07
   0  10   5    0.04    0.07
   3  10   5    0.95    0.16
   6  10   5   -0.04    0.11
  -3  14  -5    0.01    0.10
  11   3   5    0.15    0.11
   0  11  -5   -0.06    0.08
   3   8  -5    0.03    0.07
   6   5  -5    1.51    0.16
   6   5  -5    1.36    0.14
   9   2  -5    0.00    0.07
  -2  11   5   -0.07    0.06
  12  -1  -5    0.22    0.10
   1  11   5    0.27    0.11
   4  11   5   -0.02    0.10
  12   4   5    0.29    0.14
  12   4   5    0.18    0.14
  -1  13  -5    0.05    0.10
  12   1   5    0.12    0.11
   2  10  -5    0.53    0.13
   5   7  -5    0.25    0.08
   5   7  -5    0.22    0.11
   8   4  -5    0.78    0.13
   8   4  -5    1.13    0.17
  11   1  -5    0.33    0.12
  -1  12   5    0.46    0.12
   2  12   5    0.05    0.11
  13   2   5    0.11    0.13
   1  12  -5    0.21    0.11
   4   9  -5    0.99    0.16
   7   6  -5    0.08    0.11
   7   6  -5    0.24    0.10
  10   3  -5    1.02    0.17
  10   3  -5    0.79    0.15
  13   0  -5    0.07    0.11
   0  13   5   -0.04    0.09
   0  14  -5    0.00    0.12
  14   0   5    0.01    0.12
   3  11  -5    0.14    0.11
   6   8  -5    0.06    0.10
   9   5  -5    0.09    0.10
   9   5  -5    0.05    0.11
  12   2  -5    0.00    0.11
  12   2  -5    0.02    0.12
   1  14   5    0.09    0.13
   2  13  -5    0.29    0.13
  15  -2   5    0.19    0.13
   5  10  -5   -0.04    0.11
   8   7  -5   -0.13    0.09
  11   4  -5   -0.11    0.10
  11   4  -5    0.19    0.13
  14   1  -5    0.17    0.14
  14   1  -5    0.15    0.14
   4  12  -5    0.02    0.12
   7   9  -5    0.07    0.11
  10   6  -5    0.06    0.12
   2  -1  -6    7.95    0.15
  -1   2  -6    7.88    0.16
  -1   2  -6    7.97    0.15
   1   1  -6    8.08    0.16
   1   1  -6    8.05    0.16
  -2   1  -6    7.64    0.16
  -2   4  -6   25.44    0.43
  -2   4  -6   25.55    0.39
   0   3  -6    0.25    0.04
   0   3  -6    0.21    0.03
   3   0  -6    0.37    0.04
  -3   3  -6    0.42    0.05
  -3   6  -6    1.59    0.10
  -1   5  -6    0.36    0.04
  -1   5  -6    0.44    0.06
   2   2  -6   25.92    0.42
  -4   2  -6   26.08    0.45
   2   2  -6   26.61    0.44
  -2   4   6   26.22    0.38
   5  -1  -6    0.26    0.04
  -4   5  -6    0.24    0.05
   1   4   6    0.32    0.05
  -4   8  -6    0.10    0.05
   4   4   6    0.05    0.06
  -2   7  -6    1.08    0.07
  -2   7  -6    1.24    0.11
   1   4  -6    0.44    0.05
   1   4  -6    0.32    0.05
   4   1  -6    0.17    0.04
  -5   4  -6    0.19    0.04
  -1   5   6    0.33    0.05
  -5   7  -6    1.71    0.10
   2   5   6    1.53    0.11
  -5  10  -6    1.60    0.14
   5   5   6    1.23    0.14
  -3   9  -6    0.04    0.06
   0   6  -6   18.68    0.34
   0   6  -6   19.01    0.40
  -6   6   6   18.94    0.30
   3   3  -6    1.63    0.09
   3   3  -6    1.60    0.10
  -3   6   6    1.49    0.07
  -6   6  -6   26.64    0.48
   6   0  -6   26.25    0.49
   0   6   6   26.74    0.49
   0   6   6   26.76    0.38
  -6   9  -6    0.41    0.08
   3   6   6    0.53    0.10
   6   6   6    0.01    0.07
  -4  11  -6    0.83    0.12
   7   4   6    0.59    0.11
  -1   8  -6    9.34    0.28
  -1   8  -6    9.20    0.21
   2   5  -6    1.00    0.10
   2   5  -6    1.15    0.08
  -5   7   6    1.15    0.07
  -7   5  -6    1.58    0.11
   5   2  -6    1.60    0.11
   5   2  -6    1.40    0.11
  -2   7   6    1.57    0.09
   8  -1  -6    5.23    0.20
  -7   8  -6    5.23    0.19
   1   7   6    5.49    0.21
  -7  11  -6    1.71    0.15
   4   7   6    1.92    0.18
   7   7   6    0.01    0.10
   8   5   6   -0.04    0.09
  -2  10  -6   -0.04    0.06
   1   7  -6    9.16    0.23
   1   7  -6    9.13    0.29
   4   4  -6    0.21    0.07
   4   4  -6    0.15    0.05
  -4   8   6    0.22    0.05
   7   1  -6    4.99    0.21
  -8   7  -6    5.36    0.19
  -1   8   6    5.52    0.20
  -8  10  -6   -0.01    0.06
  10  -2  -6    0.00    0.06
   2   8   6    0.09    0.07
   5   8   6    0.00    0.09
   8   8   6   -0.07    0.10
   9   6   6    0.08    0.10
  -3  12  -6    0.17    0.09
   9   3   6    0.09    0.09
   0   9  -6    0.26    0.08
   3   6  -6    0.12    0.05
   3   6  -6    0.05    0.06
   6   3  -6    0.45    0.10
   6   3  -6    0.46    0.09
  -3   9   6    0.46    0.07
   9   0  -6    0.96    0.13
  -9   9  -6    0.82    0.10
   0   9   6    0.92    0.12
  12  -3  -6   -0.05    0.07
   3   9   6    0.11    0.09
   6   9   6    0.18    0.12
  10   4   6    0.01    0.10
  -1  11  -6    1.57    0.17
   2   8  -6   -0.05    0.05
   5   5  -6    1.27    0.15
   5   5  -6    1.50    0.12
 -10   8  -6    0.12    0.06
   8   2  -6    0.08    0.08
  -2  10   6    0.09    0.06
  11  -1  -6    1.60    0.17
   1  10   6    1.32    0.16
   4  10   6   -0.08    0.09
  11   5   6   -0.17    0.10
  -2  13  -6    0.05    0.10
  11   2   6    0.17    0.11
   1  10  -6    1.54    0.18
   4   7  -6    0.96    0.14
   4   7  -6    0.93    0.11
   7   4  -6    1.86    0.17
   7   4  -6    2.05    0.19
  10   1  -6    1.56    0.17
  -1  11   6    1.65    0.16
  13  -2  -6    0.11    0.10
   2  11   6    0.03    0.09
   5  11   6    0.12    0.13
  12   3   6   -0.09    0.11
   0  12  -6    0.66    0.14
   3   9  -6    0.13    0.10
   6   6  -6   -0.01    0.08
   6   6  -6    0.01    0.07
   9   3  -6    0.02    0.09
   9   3  -6    0.04    0.09
  12   0  -6    0.40    0.12
   0  12   6    0.61    0.13
   3  12   6    0.01    0.11
  -1  14  -6   -0.15    0.09
  13   1   6   -0.11    0.11
   2  11  -6    0.13    0.10
   5   8  -6    0.02    0.09
   8   5  -6    0.02    0.08
   8   5  -6    0.05    0.09
  11   2  -6    0.00    0.10
  11   2  -6    0.23    0.12
  14  -1  -6   -0.15    0.10
   1  13   6    0.05    0.11
   1  13  -6   -0.02    0.10
   4  10  -6   -0.07    0.09
   7   7  -6    0.06    0.11
  10   4  -6   -0.06    0.10
  10   4  -6   -0.01    0.10
  13   1  -6    0.00    0.12
  13   1  -6   -0.08    0.10
   3  12  -6    0.12    0.11
   6   9  -6    0.13    0.12
   9   6  -6    0.14    0.11
   9   6  -6    0.03    0.11
  12   3  -6    0.01    0.13
  12   3  -6   -0.06    0.11
   5  11  -6   -0.11    0.11
   8   8  -6   -0.07    0.11
  11   5  -6    0.06    0.13
  11   5  -6   -0.10    0.12
   0   1  -7   -0.02    0.02
   0   1  -7    0.05    0.02
   1  -1  -7   -0.04    0.01
  -1   0  -7   -0.04    0.02
  -1   3  -7   -0.05    0.03
  -1   3  -7   -0.08    0.02
   2   0  -7   -0.12    0.02
  -2   2  -7   -0.13    0.02
   2   0  -7   -0.07    0.02
  -2   5  -7   18.74    0.36
  -2   5  -7   18.76    0.32
   1   2  -7   -0.04    0.03
  -3   1  -7   -0.02    0.03
   1   2  -7   -0.05    0.02
   4  -1  -7   15.61    0.27
  -3   4  -7   15.45    0.30
  -3   7  -7    4.98    0.18
   0   4  -7    0.00    0.02
   0   4  -7    0.15    0.04
   3   1  -7   15.91    0.31
   3   1  -7   15.82    0.30
  -4   3  -7   15.68    0.31
  -1   4   7   15.70    0.27
  -4   6  -7    7.62    0.21
  -4   9  -7    2.19    0.14
  -1   6  -7    0.81    0.06
  -1   6  -7    0.84    0.09
   2   3  -7   19.03    0.37
   2   3  -7   19.01    0.35
  -3   5   7   18.60    0.29
  -5   5  -7    0.01    0.03
   5   0  -7   -0.03    0.03
   0   5   7    0.00    0.03
  -5   8  -7    0.20    0.06
   3   5   7    0.13    0.06
  -5  11  -7    1.17    0.13
   6   5   7    1.04    0.14
  -2   8  -7    0.03    0.06
  -2   8  -7    0.08    0.04
   1   5  -7    0.75    0.07
   1   5  -7    0.88    0.10
  -5   6   7    0.84    0.05
   4   2  -7    7.85    0.22
  -6   4  -7    7.81    0.22
   4   2  -7    7.63    0.21
  -2   6   7    7.51    0.18
  -6   7  -7    0.52    0.08
   7  -1  -7    0.36    0.07
   1   6   7    0.43    0.05
   1   6   7    0.44    0.07
  -6  10  -7    4.18    0.19
   4   6   7    4.22    0.21
   7   6   7    0.36    0.13
  -3  10  -7    1.73    0.14
   0   7  -7   -0.01    0.03
   0   7  -7   -0.01    0.05
   3   4  -7    4.63    0.19
   3   4  -7    4.61    0.16
  -4   7   7    5.24    0.13
  -7   6  -7    0.48    0.07
   6   1  -7    0.30    0.07
  -1   7   7    0.52    0.07
   9  -2  -7    0.46    0.08
  -7   9  -7    0.68    0.10
   2   7   7    0.29    0.08
   5   7   7    0.20    0.09
   8   7   7    0.00    0.10
  -4  12  -7    1.18    0.15
   8   4   7    0.60    0.13
  -1   9  -7    0.26    0.08
   2   6  -7    0.05    0.04
   2   6  -7   -0.02    0.05
   5   3  -7    0.23    0.07
   5   3  -7    0.16    0.06
  -3   8   7    0.25    0.05
  -8   8  -7    0.03    0.05
   8   0  -7   -0.08    0.05
   0   8   7   -0.07    0.04
  11  -3  -7   -0.06    0.06
   3   8   7   -0.05    0.06
   6   8   7    0.09    0.11
   9   5   7    0.33    0.13
  -2  11  -7    0.12    0.08
   1   8  -7    0.29    0.06
   1   8  -7    0.11    0.07
   4   5  -7    2.45    0.14
   4   5  -7    2.33    0.16
   7   2  -7    0.40    0.09
   7   2  -7    0.46    0.10
  -9   7  -7    0.63    0.09
  -2   9   7    0.48    0.08
  10  -1  -7   -0.02    0.06
   1   9   7   -0.03    0.06
   4   9   7    0.88    0.16
   7   9   7    0.04    0.12
  10   6   7    0.06    0.12
  -3  13  -7    0.89    0.15
  10   3   7    0.60    0.14
   0  10  -7    0.01    0.06
   3   7  -7    2.05    0.16
   3   7  -7    2.14    0.13
   6   4  -7    4.24    0.20
   6   4  -7    4.37    0.22
   9   1  -7   -0.04    0.06
  -1  10   7    0.05    0.06
  12  -2  -7    0.94    0.14
   2  10   7    0.76    0.14
   5  10   7   -0.03    0.10
  11   4   7    0.13    0.11
  -1  12  -7    0.20    0.11
   2   9  -7    0.03    0.07
   5   6  -7    0.94    0.14
   5   6  -7    1.04    0.12
   8   3  -7   -0.05    0.07
   8   3  -7   -0.04    0.07
  -3  11   7    0.00    0.06
  11   0  -7    0.02    0.08
   0  11   7   -0.04    0.07
   3  11   7    0.06    0.10
  -2  14  -7   -0.05    0.10
  12   2   7    0.04    0.12
   1  11  -7    0.11    0.10
   4   8  -7    0.91    0.14
   7   5  -7    0.00    0.09
   7   5  -7    0.21    0.09
  10   2  -7    0.69    0.15
  10   2  -7    0.86    0.15
  13  -1  -7   -0.02    0.09
   1  12   7   -0.04    0.09
   4  12   7    0.05    0.13
   0  13  -7    0.08    0.11
   3  10  -7    0.49    0.13
   6   7  -7    0.52    0.13
   6   7  -7    0.44    0.11
   9   4  -7    1.35    0.19
   9   4  -7    1.17    0.18
  12   1  -7    0.11    0.11
  12   1  -7   -0.13    0.09
   2  13   7   -0.01    0.11
  -1  15  -7    0.06    0.13
  14   1   7    0.00    0.14
   2  12  -7    0.00    0.10
   5   9  -7    0.27    0.13
   8   6  -7    0.20    0.11
   8   6  -7    0.32    0.11
  11   3  -7    0.14    0.12
  11   3  -7   -0.01    0.12
  14   0  -7   -0.10    0.11
  14   0  -7    0.09    0.12
   1  14  -7   -0.12    0.11
  15  -1   7    0.09    0.13
   4  11  -7   -0.04    0.09
   7   8  -7   -0.11    0.08
  10   5  -7   -0.05    0.10
  10   5  -7   -0.06    0.11
  13   2  -7   -0.13    0.12
  13   2  -7   -0.05    0.12
   6  10  -7   -0.04    0.11
   9   7  -7    0.05    0.12
  12   4  -7    0.02    0.14
  12   4  -7    0.12    0.14
  -1   1  -8    7.18    0.15
   0  -1  -8    6.93    0.14
   1   0  -8    7.10    0.14
   1   0  -8    7.11    0.14
   0  -1  -8    7.29    0.13
   0   2  -8   32.59    0.49
   0   2  -8   34.81    0.52
   2  -2  -8   34.18    0.48
  -2   0  -8   33.48    0.52
   3  -1  -8  100.15    1.35
  -2   3  -8  100.06    1.33
  -2   3  -8   98.18    1.37
   3  -1  -8   99.67    1.32
  -1   4  -8   65.69    0.92
  -1   4  -8   67.18    0.98
  -3   2  -8   99.52    1.37
   2   1  -8   99.76    1.34
   2   1  -8   98.20    1.35
   5  -2  -8   44.36    0.64
  -3   5  -8   43.55    0.69
  -2   6  -8   19.09    0.33
  -2   6  -8   19.17    0.39
   1   3  -8   67.27    0.94
   3  -4  -8   66.00    0.89
   1   3  -8   66.64    0.98
   4   0  -8   16.87    0.33
   4   0  -8   16.34    0.31
  -4   4  -8   17.47    0.34
  -4   7  -8    7.91    0.23
  -3   8  -8    0.61    0.09
  -3   8  -8    0.69    0.07
   0   5  -8   -0.02    0.03
   0   5  -8    0.00    0.02
   3   2  -8   45.94    0.72
   3   2  -8   45.12    0.71
  -5   3  -8   45.88    0.73
  -2   5   8   45.83    0.66
  -5   6  -8    0.28    0.06
   6  -1  -8    0.22    0.05
   1   5   8    0.26    0.06
  -5   9  -8    3.57    0.17
   4   5   8    3.15    0.18
  -4  10  -8    2.57    0.16
  -1   7  -8    0.99    0.07
  -1   7  -8    0.76    0.09
   2   4  -8   20.73    0.41
   2   4  -8   19.45    0.37
  -4   6   8   19.92    0.31
   5   1  -8    0.19    0.06
   5   1  -8    0.23    0.06
  -6   5  -8    0.31    0.06
  -1   6   8    0.28    0.05
  -6   8  -8    0.41    0.07
   8  -2  -8    0.27    0.07
   2   6   8    0.28    0.07
  -6  11  -8    1.00    0.12
   5   6   8    0.87    0.13
  -5  12  -8   -0.05    0.06
   7   5   8   -0.17    0.06
  -2   9  -8   -0.01    0.05
   1   6  -8    0.96    0.08
  -7   4  -8    8.50    0.24
   4   3  -8    8.61    0.24
   4   3  -8    8.18    0.25
  -3   7   8    7.95    0.19
  -7   7  -8    5.16    0.19
   7   0  -8    4.97    0.19
   0   7   8    5.11    0.19
  -7  10  -8    1.62    0.13
  10  -3  -8    1.32    0.13
   3   7   8    1.50    0.15
   6   7   8   -0.03    0.08
   8   6   8    0.26    0.11
  -3  11  -8    0.30    0.09
   0   8  -8    4.95    0.22
   0   8  -8    4.72    0.16
   3   5  -8    0.63    0.08
   3   5  -8    0.79    0.11
  -5   8   8    0.70    0.06
  -8   6  -8    0.40    0.07
   6   2  -8    0.26    0.07
   6   2  -8    0.31    0.08
  -2   8   8    0.30    0.06
  -8   9  -8    0.43    0.08
   9  -1  -8    0.24    0.08
   1   8   8    0.17    0.07
   4   8   8    0.28    0.10
   7   8   8    0.33    0.12
   9   7   8   -0.03    0.12
  -4  13  -8    0.01    0.08
   9   4   8   -0.09    0.09
  -1  10  -8    0.39    0.10
   2   7  -8    0.02    0.04
   2   7  -8    0.03    0.06
   5   4  -8    3.43    0.17
   5   4  -8    3.41    0.19
  -4   9   8    3.46    0.14
   8   1  -8    0.32    0.08
  -9   8  -8    0.31    0.07
  -1   9   8    0.33    0.08
  11  -2  -8    0.41    0.10
   2   9   8    0.18    0.09
   5   9   8    0.20    0.12
  10   5   8    0.25    0.12
  -2  12  -8    0.14    0.10
   1   9  -8    0.44    0.11
   4   6  -8    2.71    0.16
   4   6  -8    2.50    0.17
   7   3  -8    1.49    0.15
   7   3  -8    1.53    0.15
  -3  10   8    1.46    0.12
  10   0  -8    1.25    0.15
   0  10   8    0.95    0.13
   3  10   8   -0.11    0.08
   6  10   8   -0.15    0.11
  -3  14  -8   -0.11    0.09
  11   3   8   -0.04    0.10
   0  11  -8    1.00    0.15
   3   8  -8    0.12    0.09
   6   5  -8    0.91    0.12
   6   5  -8    0.72    0.13
   9   2  -8    0.33    0.10
   9   2  -8    0.38    0.10
  -2  11   8    0.23    0.08
  12  -1  -8    0.30    0.11
   1  11   8    0.32    0.11
   4  11   8    0.23    0.13
  12   4   8   -0.01    0.12
  -1  13  -8   -0.04    0.09
   2  10  -8    0.27    0.11
   5   7  -8   -0.04    0.07
   5   7  -8   -0.02    0.06
   8   4  -8    0.04    0.08
   8   4  -8    0.10    0.10
  11   1  -8    0.33    0.13
  11   1  -8    0.47    0.12
  -1  12   8    0.25    0.11
   2  12   8    0.06    0.10
  -2  15  -8    0.05    0.13
  13   2   8    0.17    0.14
   1  12  -8   -0.08    0.09
   4   9  -8   -0.10    0.08
   7   6  -8   -0.12    0.07
   7   6  -8   -0.10    0.08
  10   3  -8   -0.12    0.08
  10   3  -8   -0.07    0.08
  13   0  -8   -0.04    0.09
  13   0  -8    0.07    0.11
   0  13   8   -0.05    0.09
   0  14  -8    0.12    0.13
  14   0   8    0.04    0.12
   3  11  -8    0.16    0.11
   6   8  -8    0.29    0.13
   9   5  -8    0.23    0.11
   9   5  -8    0.04    0.12
  12   2  -8    0.07    0.12
  12   2  -8    0.08    0.12
  15  -1  -8   -0.01    0.11
   2  13  -8    0.12    0.13
   5  10  -8    0.34    0.14
   8   7  -8    0.37    0.15
  11   4  -8    0.08    0.13
  11   4  -8    0.14    0.13
  14   1  -8    0.13    0.14
  14   1  -8    0.07    0.14
   4  12  -8    0.01    0.12
   7   9  -8   -0.12    0.11
  10   6  -8   -0.09    0.11
   0   0  -9   -0.04    0.01
   0   0  -9   -0.02    0.02
  -1   2  -9   70.70    0.96
   2  -1  -9   68.92    0.95
  -1   2  -9   70.90    0.99
   1   1  -9   70.79    0.97
   1   1  -9   70.54    0.96
   1  -2  -9   70.12    0.92
  -2   1  -9   69.70    0.99
   4  -2  -9   39.65    0.57
  -2   4  -9   41.07    0.64
  -2   4  -9   40.05    0.60
   0   3  -9   -0.02    0.02
   0   3  -9    0.02    0.02
   3  -3  -9   -0.01    0.02
   3   0  -9   -0.01    0.02
  -3   3  -9   -0.03    0.02
   3   0  -9    0.02    0.03
   6  -3  -9    9.29    0.19
  -3   6  -9    9.16    0.24
  -1   5  -9    2.31    0.09
  -1   5  -9    2.44    0.12
  -4   2  -9   39.22    0.64
   2   2  -9   39.96    0.62
   2   2  -9   39.06    0.61
  -2   4   9   40.06    0.55
   5  -1  -9    4.40    0.13
  -4   5  -9    4.09    0.15
  -4   8  -9    0.49    0.08
  -2   7  -9    3.35    0.16
  -2   7  -9    2.88    0.11
   1   4  -9    2.27    0.10
   1   4  -9    2.18    0.11
   4   1  -9    4.31    0.15
   4   1  -9    4.50    0.16
  -5   4  -9    5.03    0.17
  -1   5   9    4.43    0.13
  -5   7  -9    2.35    0.12
   7  -2  -9    2.24    0.11
   2   5   9    2.29    0.13
  -5  10  -9    3.89    0.19
   5   5   9    3.16    0.19
  -3   9  -9    5.52    0.18
  -3   9  -9    5.52    0.22
   0   6  -9    0.01    0.03
   0   6  -9    0.07    0.05
   3   3  -9    9.02    0.25
   3   3  -9    9.27    0.23
  -6   3  -9    9.21    0.25
  -3   6   9    9.13    0.18
  -6   6  -9   -0.02    0.03
   6   0  -9   -0.02    0.04
   0   6   9   -0.06    0.03
   0   6   9    0.00    0.02
  -6   9  -9    2.52    0.14
   9  -3  -9    2.23    0.13
   3   6   9    2.70    0.17
  -6  12  -9   -0.05    0.06
   6   6   9   -0.09    0.06
  -4  11  -9    0.21    0.08
  -1   8  -9    0.37    0.09
  -1   8  -9    0.53    0.07
   2   5  -9    2.99    0.15
   2   5  -9    3.09    0.13
  -5   7   9    3.19    0.09
  -7   5  -9    2.40    0.13
   5   2  -9    2.70    0.14
   5   2  -9    2.37    0.14
  -2   7   9    2.53    0.11
   8  -1  -9    0.01    0.05
  -7   8  -9    0.09    0.05
   1   7   9   -0.01    0.05
  -7  11  -9    0.14    0.07
   4   7   9   -0.05    0.06
   7   7   9    0.21    0.11
  -5  13  -9    1.24    0.16
   8   5   9    1.22    0.18
  -2  10  -9    0.00    0.07
   1   7  -9    0.35    0.08
   1   7  -9    0.53    0.07
   4   4  -9    0.33    0.07
   4   4  -9    0.38    0.08
  -4   8   9    0.31    0.05
   7   1  -9   -0.04    0.06
   7   1  -9   -0.02    0.05
  -8   7  -9    0.01    0.04
  -1   8   9   -0.01    0.04
  -8  10  -9    0.14    0.07
  10  -2  -9    0.17    0.07
   2   8   9    0.21    0.08
   5   8   9    0.46    0.13
   8   8   9   -0.09    0.10
   9   6   9   -0.06    0.10
  -3  12  -9    0.47    0.11
   0   9  -9   -0.02    0.06
   3   6  -9    5.73    0.20
   3   6  -9    5.64    0.24
   6   3  -9    2.34    0.15
   6   3  -9    2.39    0.17
  -9   6  -9    2.17    0.14
  -3   9   9    2.25    0.12
  -9   9  -9    0.06    0.05
   9   0  -9   -0.02    0.06
   0   9   9   -0.05    0.05
   3   9   9    0.78    0.14
   6   9   9    0.07    0.11
  -4  14  -9    0.25    0.11
  10   4   9    0.26    0.12
  -1  11  -9   -0.04    0.08
   2   8  -9    0.01    0.06
   2   8  -9    0.00    0.05
   5   5  -9    3.42    0.18
   5   5  -9    3.35    0.20
   8   2  -9    0.17    0.08
   8   2  -9    0.17    0.08
 -10   8  -9    0.17    0.07
  -2  10   9    0.12    0.07
  11  -1  -9    0.06    0.07
   1  10   9    0.13    0.09
   4  10   9    0.12    0.12
  11   5   9    0.04    0.12
  -2  13  -9    0.44    0.13
   1  10  -9    0.16    0.09
   4   7  -9    0.20    0.08
   4   7  -9    0.17    0.07
   7   4  -9    0.10    0.09
   7   4  -9    0.17    0.08
  10   1  -9    0.09    0.09
  10   1  -9    0.20    0.10
  -1  11   9    0.11    0.08
   2  11   9    0.51    0.13
   5  11   9    0.03    0.13
  -3  15  -9   -0.02    0.12
  12   3   9    0.03    0.12
   0  12  -9    0.01    0.08
   3   9  -9    0.54    0.12
   6   6  -9   -0.13    0.05
   6   6  -9   -0.01    0.08
   9   3  -9    0.47    0.12
   9   3  -9    0.63    0.13
  12   0  -9   -0.03    0.10
  12   0  -9   -0.16    0.08
   0  12   9   -0.12    0.08
   3  12   9   -0.06    0.10
  -1  14  -9   -0.06    0.11
  13   1   9   -0.03    0.11
   2  11  -9    0.23    0.12
   5   8  -9    1.12    0.17
   8   5  -9    0.54    0.13
   8   5  -9    0.46    0.12
  11   2  -9    0.76    0.16
  11   2  -9    0.51    0.13
  14  -1  -9    0.15    0.11
   1  13   9   -0.05    0.10
   1  13  -9   -0.09    0.10
   4  10  -9    0.32    0.13
   7   7  -9    0.11    0.11
  10   4  -9    0.26    0.12
  10   4  -9    0.12    0.12
  13   1  -9    0.07    0.12
  13   1  -9    0.05    0.12
   3  12  -9    0.20    0.13
   6   9  -9   -0.08    0.10
   9   6  -9   -0.13    0.10
   9   6  -9   -0.05    0.11
  12   3  -9   -0.04    0.11
  12   3  -9   -0.14    0.11
   5  11  -9    0.02    0.12
   8   8  -9   -0.07    0.11
  11   5  -9   -0.01    0.13
  11   5  -9   -0.03    0.12
  -1   0 -10  102.29    1.40
   0   1 -10  102.67    1.37
   1  -1 -10  104.29    1.36
   1  -1 -10  103.70    1.36
   0   1 -10  103.63    1.39
  -1   0 -10  102.97    1.36
  -1   3 -10    0.07    0.03
   3  -2 -10    0.06    0.03
  -1   3 -10    0.13    0.04
   2   0 -10   45.55    0.66
  -2   2 -10   45.15    0.68
   2   0 -10   45.64    0.65
   0  -2 -10   44.84    0.62
  -2   5 -10    0.47    0.05
   5  -3 -10    0.53    0.04
  -2   5 -10    0.44    0.06
  -3   1 -10    0.03    0.03
   1   2 -10    0.10    0.03
   2  -3 -10    0.06    0.02
   1   2 -10    0.04    0.02
  -3   4 -10    5.82    0.17
   4  -1 -10    5.90    0.14
   4  -1 -10    6.12    0.17
   7  -4 -10    0.14    0.03
  -3   7 -10    0.15    0.05
  -3   7 -10    0.19    0.04
   4  -4 -10    3.45    0.11
   0   4 -10    3.21    0.11
   0   4 -10    3.39    0.13
   3   1 -10    5.59    0.16
  -4   3 -10    5.50    0.17
   3   1 -10    6.02    0.17
   6  -2 -10    0.15    0.04
  -4   6 -10    0.14    0.05
  -4   9 -10    2.07    0.14
  -1   6 -10    3.26    0.15
  -1   6 -10    3.10    0.11
   3  -5 -10    0.49    0.03
  -5   2 -10    0.53    0.08
   2   3 -10    0.37    0.05
   2   3 -10    0.85    0.07
  -3   5  10    0.45    0.03
   5   0 -10    8.82    0.24
   5   0 -10    8.09    0.21
  -5   5 -10    8.29    0.23
   0   5  10    8.65    0.21
  -5   8 -10    0.49    0.08
   8  -3 -10    0.48    0.07
  -5  11 -10    0.27    0.08
   6   5  10    0.26    0.09
  -2   8 -10    4.67    0.15
  -2   8 -10    4.60    0.20
   1   5 -10    3.41    0.15
   1   5 -10    3.25    0.12
   4   2 -10    0.14    0.05
  -6   4 -10    0.15    0.05
   4   2 -10    0.13    0.05
  -2   6  10    0.16    0.04
  -6   7 -10   12.97    0.32
   7  -1 -10   13.18    0.30
   1   6  10   12.78    0.32
  -6  10 -10    2.67    0.16
   4   6  10    2.26    0.17
  -6  13 -10   -0.04    0.07
   7   6  10   -0.10    0.07
  -3  10 -10    0.39    0.10
   0   7 -10   17.56    0.42
   0   7 -10   17.63    0.35
   3   4 -10    0.10    0.05
   3   4 -10    0.28    0.06
  -4   7  10    0.13    0.03
  -7   6 -10   12.95    0.32
   6   1 -10   12.76    0.33
   6   1 -10   12.79    0.32
  -1   7  10   12.41    0.29
  -7   9 -10    0.65    0.09
   9  -2 -10    0.60    0.09
   2   7  10    0.74    0.11
  -7  12 -10    0.10    0.07
   5   7  10    0.01    0.08
   8   7  10   -0.08    0.08
  -4  12 -10    0.12    0.08
   8   4  10    0.09    0.09
  -1   9 -10    0.35    0.09
   2   6 -10    4.73    0.20
   2   6 -10    4.98    0.18
   5   3 -10    0.47    0.08
  -8   5 -10    0.69    0.09
   5   3 -10    0.37    0.07
  -3   8  10    0.50    0.07
  -8   8 -10    5.71    0.22
   8   0 -10    5.85    0.22
   0   8  10    6.00    0.22
  11  -3 -10    0.42    0.09
  -8  11 -10    0.43    0.09
   3   8  10    0.47    0.11
   6   8  10   -0.02    0.10
   9   5  10    0.02    0.11
  -2  11 -10    0.69    0.13
   1   8 -10    0.26    0.08
   1   8 -10    0.34    0.07
   4   5 -10    1.96    0.13
   4   5 -10    2.12    0.15
   7   2 -10    0.72    0.11
   7   2 -10    0.99    0.12
  -9   7 -10    0.69    0.10
  -2   9  10    0.83    0.10
  -9  10 -10    0.41    0.09
  10  -1 -10    0.47    0.10
   1   9  10    0.41    0.10
   4   9  10    0.26    0.12
   7   9  10    0.02    0.11
  10   6  10    0.05    0.11
  -3  13 -10    0.03    0.09
  10   3  10    0.11    0.11
   0  10 -10    1.33    0.16
   3   7 -10    0.40    0.08
   3   7 -10    0.25    0.09
   6   4 -10    2.45    0.17
   6   4 -10    2.67    0.16
   9   1 -10    0.59    0.11
 -10   9 -10    0.38    0.09
   9   1 -10    0.44    0.11
  -1  10  10    0.38    0.09
  12  -2 -10    0.34    0.10
   2  10  10    0.33    0.11
   5  10  10    0.05    0.11
  11   4  10   -0.06    0.11
  -1  12 -10    1.41    0.18
   2   9 -10    0.65    0.13
   5   6 -10    0.34    0.09
   5   6 -10    0.34    0.09
   8   3 -10    0.41    0.10
   8   3 -10    0.41    0.11
  11   0 -10    1.14    0.15
  11   0 -10    1.22    0.17
   0  11  10    1.25    0.16
   3  11  10   -0.08    0.09
  -2  14 -10    0.06    0.10
  12   2  10    0.07    0.12
   1  11 -10    1.11    0.17
   4   8 -10    0.29    0.10
   7   5 -10    0.04    0.08
   7   5 -10    0.01    0.08
  10   2 -10    0.38    0.12
  10   2 -10    0.39    0.12
  13  -1 -10    0.12    0.10
  13  -1 -10    0.23    0.12
   1  12  10    0.07    0.10
  16  -4 -10    0.04    0.12
   4  12  10   -0.03    0.12
   0  13 -10    0.12    0.12
   3  10 -10    0.08    0.09
   6   7 -10    0.01    0.07
   6   7 -10    0.05    0.09
   9   4 -10    0.07    0.09
   9   4 -10    0.27    0.12
  12   1 -10    0.14    0.12
  12   1 -10    0.07    0.10
  15  -2 -10    0.15    0.12
   2  13  10    0.13    0.13
  -1  15 -10   -0.16    0.12
  14   1  10    0.05    0.14
   2  12 -10   -0.02    0.11
   5   9 -10    0.07    0.10
   8   6 -10    0.08    0.09
   8   6 -10    0.09    0.11
  11   3 -10   -0.01    0.12
  11   3 -10   -0.09    0.09
  14   0 -10    0.00    0.12
   1  14 -10   -0.03    0.13
   4  11 -10    0.03    0.10
   7   8 -10    0.03    0.11
  10   5 -10    0.03    0.11
  10   5 -10   -0.03    0.10
  13   2 -10   -0.08    0.13
  13   2 -10   -0.09    0.12
   6  10 -10    0.02    0.12
   9   7 -10   -0.01    0.12
  12   4 -10   -0.01    0.14
  12   4 -10   -0.14    0.12
   1   0 -11   -0.01    0.02
  -1   1 -11    0.00    0.02
   1   0 -11    0.01    0.02
   0  -1 -11    0.00    0.02
  -1   1 -11   -0.01    0.02
   0  -1 -11    0.01    0.02
   0   2 -11   -0.02    0.02
  -2   0 -11    0.00    0.03
   0   2 -11   -0.03    0.03
   2  -2 -11    0.01    0.02
   3  -1 -11    4.05    0.12
   3  -1 -11    4.03    0.10
  -2   3 -11    4.20    0.14
  -2   3 -11    3.91    0.12
   4  -3 -11    2.87    0.10
  -1   4 -11    2.81    0.12
  -1   4 -11    2.99    0.10
  -3   2 -11    3.97    0.14
   2   1 -11    3.94    0.12
   2   1 -11    3.90    0.12
   1  -3 -11    3.94    0.09
  -3   5 -11   10.11    0.25
   5  -2 -11   10.19    0.20
   5  -2 -11    9.96    0.25
   6  -4 -11   10.07    0.18
  -2   6 -11   10.33    0.27
  -2   6 -11    9.92    0.23
  -4   1 -11    2.90    0.13
   1   3 -11    2.87    0.12
   1   3 -11    3.08    0.11
   3  -4 -11    2.92    0.08
  -4   4 -11   -0.04    0.03
   4   0 -11    0.00    0.03
   4   0 -11    0.00    0.03
   7  -3 -11    4.20    0.13
  -4   7 -11    4.41    0.17
  -3   8 -11    1.35    0.11
  -3   8 -11    1.57    0.10
   0   5 -11    0.01    0.03
   0   5 -11   -0.03    0.03
  -5   3 -11   10.42    0.26
   3   2 -11   10.05    0.24
   3   2 -11   10.07    0.25
  -2   5  11   10.31    0.20
   6  -1 -11    2.53    0.14
   6  -1 -11    2.93    0.12
  -5   6 -11    2.80    0.14
   9  -4 -11    2.53    0.12
  -5   9 -11    2.94    0.16
  -4  10 -11    3.67    0.19
  -1   7 -11    0.08    0.04
  -1   7 -11    0.06    0.05
   2   4 -11    9.68    0.27
   2   4 -11   10.31    0.25
   4  -6 -11   10.16    0.19
   5   1 -11    2.96    0.13
  -6   5 -11    2.58    0.14
   5   1 -11    2.86    0.14
  -1   6  11    2.73    0.11
  -6   8 -11    0.31    0.07
   8  -2 -11    0.23    0.06
   2   6  11    0.25    0.07
  -6  11 -11    0.93    0.12
   5   6  11    0.81    0.13
  -5  12 -11    0.04    0.07
   7   5  11   -0.07    0.06
  -2   9 -11    3.01    0.13
  -2   9 -11    2.81    0.17
   1   6 -11    0.04    0.05
   1   6 -11    0.06    0.04
   4   3 -11    4.10    0.17
  -7   4 -11    4.06    0.18
   4   3 -11    4.08    0.17
  -3   7  11    3.97    0.13
   7   0 -11   -0.03    0.04
  -7   7 -11   -0.04    0.04
   7   0 -11   -0.11    0.04
   0   7  11    0.02    0.05
  10  -3 -11    1.76    0.13
  -7  10 -11    1.62    0.15
   3   7  11    1.47    0.15
   6   7  11   -0.01    0.09
   8   6  11    0.28    0.12
  -3  11 -11   -0.04    0.07
   0   8 -11   -0.06    0.05
   0   8 -11   -0.03    0.04
   3   5 -11    1.30    0.10
   3   5 -11    1.39    0.12
   6   2 -11    0.27    0.08
  -8   6 -11    0.20    0.07
   6   2 -11    0.17    0.06
  -2   8  11    0.11    0.05
   9  -1 -11    0.07    0.06
  -8   9 -11    0.02    0.05
   1   8  11   -0.01    0.06
   4   8  11    0.24    0.10
   7   8  11    0.00    0.10
   9   7  11    0.17    0.12
  -4  13 -11    0.72    0.14
   9   4  11    0.69    0.14
  -1  10 -11    0.26    0.09
   2   7 -11    3.03    0.18
   2   7 -11    3.14    0.15
   5   4 -11    2.87    0.16
   5   4 -11    2.55    0.17
  -9   8 -11    0.06    0.06
   8   1 -11   -0.09    0.06
   8   1 -11    0.10    0.07
  -1   9  11   -0.09    0.05
  11  -2 -11    0.21    0.08
   2   9  11   -0.03    0.08
   5   9  11    0.07    0.11
  10   5  11   -0.13    0.10
  -2  12 -11    0.29    0.11
   1   9 -11    0.27    0.09
   4   6 -11    3.47    0.20
   4   6 -11    3.64    0.18
   7   3 -11    1.34    0.14
 -10   7 -11    1.74    0.16
   7   3 -11    1.68    0.17
  10   0 -11   -0.01    0.07
  10   0 -11    0.00    0.07
   0  10  11   -0.12    0.06
   3  10  11    0.49    0.13
   6  10  11    0.10    0.13
  -3  14 -11    0.00    0.10
  11   3  11    0.18    0.12
   0  11 -11    0.08    0.09
   3   8 -11   -0.03    0.06
   3   8 -11    0.08    0.06
   6   5 -11    1.10    0.15
   6   5 -11    1.00    0.13
   9   2 -11    0.02    0.08
 -11   9 -11    0.17    0.08
   9   2 -11    0.13    0.08
  12  -1 -11    0.56    0.13
  12  -1 -11    0.32    0.11
   1  11  11    0.35    0.11
  15  -4 -11    0.04    0.09
   4  11  11    0.12    0.13
  12   4  11    0.29    0.15
  -1  13 -11    0.10    0.11
   2  10 -11    0.20    0.10
   5   7 -11   -0.06    0.08
   5   7 -11    0.07    0.07
   8   4 -11    0.17    0.10
   8   4 -11    0.17    0.09
  11   1 -11    0.27    0.11
  11   1 -11    0.20    0.10
  14  -2 -11    0.00    0.10
   2  12  11   -0.02    0.10
  -2  15 -11    0.15    0.13
  13   2  11   -0.13    0.11
   1  12 -11    0.11    0.10
   4   9 -11    0.61    0.14
   7   6 -11    0.08    0.09
   7   6 -11    0.07    0.08
  10   3 -11    0.63    0.15
  10   3 -11    0.43    0.13
  13   0 -11   -0.01    0.10
  13   0 -11   -0.11    0.09
   0  14 -11   -0.15    0.11
   3  11 -11    0.00    0.09
   6   8 -11    0.17    0.11
   9   5 -11    0.09    0.10
   9   5 -11    0.16    0.11
  12   2 -11   -0.11    0.10
  12   2 -11    0.00    0.12
   2  13 -11    0.21    0.13
   5  10 -11   -0.10    0.09
   8   7 -11   -0.05    0.11
  11   4 -11   -0.06    0.12
  11   4 -11   -0.10    0.11
   4  12 -11    0.11    0.13
   7   9 -11    0.07    0.13
  10   6 -11   -0.01    0.12
  10   6 -11    0.08    0.12
   0   0 -12   19.47    0.32
   0   0 -12   19.61    0.33
  -1  -1 -12   61.09    0.89
  -1   2 -12   62.65    0.90
   2  -1 -12   61.89    0.85
   2  -1 -12   62.57    0.87
  -1   2 -12   61.88    0.87
   1   1 -12   61.07    0.88
   1   1 -12   61.53    0.87
   1  -2 -12   61.74    0.83
   1  -2 -12   61.59    0.84
  -2   4 -12    0.01    0.03
   4  -2 -12   -0.03    0.02
   4  -2 -12    0.02    0.02
  -2   4 -12    0.00    0.03
   0   3 -12   13.58    0.29
   0   3 -12   13.53    0.26
   3  -3 -12   13.58    0.25
   3   0 -12   13.13    0.25
  -3   3 -12   12.86    0.28
   3   0 -12   12.56    0.27
  -3   6 -12    1.71    0.09
   6  -3 -12    1.80    0.08
  -3   6 -12    1.58    0.11
  -1   5 -12    1.22    0.08
   5  -4 -12    0.97    0.07
  -1   5 -12    1.27    0.09
  -4   2 -12    0.00    0.03
   2  -4 -12    0.03    0.02
   2   2 -12    0.01    0.02
   2   2 -12    0.01    0.03
   5  -1 -12    0.46    0.07
  -4   5 -12    0.43    0.07
   5  -1 -12    0.49    0.06
  -4   8 -12    0.04    0.05
   8  -4 -12    0.01    0.03
  -2   7 -12    8.02    0.25
  -2   7 -12    7.61    0.20
   4  -5 -12    1.00    0.06
   1   4 -12    1.02    0.09
   1   4 -12    1.11    0.08
   4   1 -12    0.42    0.06
   4   1 -12    0.56    0.07
  -5   4 -12    0.42    0.07
  -1   5  12    0.57    0.06
   7  -2 -12   10.29    0.24
  -5   7 -12    9.54    0.27
  -5  10 -12    0.36    0.08
  -3   9 -12    0.45    0.09
  -3   9 -12    0.51    0.07
   0   6 -12   14.90    0.36
   0   6 -12   14.51    0.31
   3   3 -12    1.75    0.11
   3   3 -12    1.91    0.11
  -6   3 -12    1.65    0.12
  -3   6  12    1.62    0.07
   6   0 -12   16.44    0.35
   6   0 -12   15.98    0.38
  -6   6 -12   15.49    0.36
   0   6  12   16.27    0.34
   9  -3 -12    0.34    0.07
  -6   9 -12    0.42    0.08
   3   6  12    0.38    0.09
  -6  12 -12    0.89    0.13
   6   6  12    0.83    0.14
  -4  11 -12    0.62    0.11
  -1   8 -12   16.88    0.42
  -1   8 -12   16.88    0.35
   2   5 -12    7.79    0.25
   2   5 -12    7.83    0.22
   5  -7 -12    7.53    0.17
   5   2 -12   10.05    0.28
  -7   5 -12   10.21    0.29
   5   2 -12   10.49    0.29
  -2   7  12   10.31    0.24
  -7   8 -12   14.56    0.36
   8  -1 -12   13.98    0.38
   8  -1 -12   13.81    0.34
   1   7  12   14.07    0.36
  -7  11 -12    0.21    0.08
   4   7  12    0.15    0.09
   7   7  12    0.88    0.16
  -5  13 -12    0.24    0.10
   8   5  12    0.48    0.14
  -2  10 -12    0.24    0.09
   1   7 -12   16.89    0.36
   1   7 -12   16.32    0.42
   4   4 -12    0.14    0.06
   4   4 -12    0.09    0.05
  -4   8  12   -0.07    0.03
   7   1 -12   13.83    0.37
  -8   7 -12   14.19    0.36
   7   1 -12   14.24    0.36
  -1   8  12   14.11    0.33
  -8  10 -12   -0.01    0.07
  10  -2 -12    0.16    0.07
   2   8  12    0.17    0.08
   5   8  12    0.01    0.10
   8   8  12    0.20    0.14
   9   6  12    0.86    0.18
  -3  12 -12    0.23    0.10
   0   9 -12    2.00    0.18
   3   6 -12    0.53    0.09
   3   6 -12    0.53    0.10
  -9   6 -12    0.25    0.08
   6   3 -12    0.55    0.10
   6   3 -12    0.30    0.08
  -3   9  12    0.20    0.06
   9   0 -12    0.74    0.11
   9   0 -12    0.54    0.11
  -9   9 -12    0.69    0.11
   0   9  12    0.68    0.11
   3   9  12   -0.04    0.07
   6   9  12    0.89    0.17
  -4  14 -12    0.67    0.14
  10   4  12    0.66    0.15
  -1  11 -12    0.03    0.08
   2   8 -12    0.47    0.08
   2   8 -12    0.37    0.10
   5   5 -12    0.54    0.11
   5   5 -12    0.56    0.09
 -10   8 -12    0.18    0.08
   8   2 -12    0.13    0.08
   8   2 -12    0.05    0.07
  -2  10  12    0.11    0.07
  11  -1 -12    0.14    0.08
  11  -1 -12    0.15    0.08
   1  10  12   -0.01    0.08
   4  10  12    0.65    0.15
  11   5  12    0.06    0.13
  -2  13 -12   -0.06    0.08
   1  10 -12    0.01    0.07
   4   7 -12    0.41    0.10
   4   7 -12    0.57    0.10
   7   4 -12    0.12    0.08
   7   4 -12    0.26    0.09
  10   1 -12   -0.07    0.07
  10   1 -12   -0.03    0.08
  -1  11  12    0.01    0.07
  13  -2 -12    0.07    0.09
   2  11  12   -0.10    0.09
  16  -5 -12    0.25    0.13
   5  11  12   -0.01    0.12
  -3  15 -12    0.28    0.13
  12   3  12    0.24    0.14
   0  12 -12   -0.07    0.09
   3   9 -12    0.36    0.12
   6   6 -12    0.84    0.14
   6   6 -12    0.99    0.14
   9   3 -12    0.05    0.09
   9   3 -12    0.09    0.10
  12   0 -12    0.07    0.09
  12   0 -12    0.17    0.11
   0  12  12   -0.04    0.09
  15  -3 -12    0.31    0.13
   3  12  12    0.29    0.13
  -1  14 -12    0.19    0.13
   2  11 -12    0.07    0.10
   5   8 -12    0.37    0.12
   8   5 -12    0.01    0.08
   8   5 -12    0.12    0.10
  11   2 -12    0.07    0.11
  11   2 -12   -0.07    0.10
  14  -1 -12    0.39    0.14
   1  13 -12    0.22    0.13
   4  10 -12    0.55    0.14
   7   7 -12    0.82    0.14
   7   7 -12    0.95    0.17
  10   4 -12    0.83    0.17
  10   4 -12    1.06    0.19
  13   1 -12    0.36    0.14
  13   1 -12    0.22    0.14
   3  12 -12    0.20    0.13
   6   9 -12    0.81    0.18
   9   6 -12    0.89    0.17
   9   6 -12    0.68    0.17
  12   3 -12    0.43    0.16
  12   3 -12    0.24    0.15
   5  11 -12    0.18    0.14
   8   8 -12   -0.07    0.11
  11   5 -12    0.03    0.13
  11   5 -12   -0.03    0.13
   1  -1 -13    0.00    0.02
   1  -1 -13    0.04    0.02
   0   1 -13   -0.01    0.03
  -1   0 -13   -0.02    0.02
   0   1 -13   -0.01    0.02
  -1   0 -13    0.00    0.03
   3  -2 -13    0.11    0.02
  -1   3 -13    0.13    0.04
   3  -2 -13    0.10    0.03
  -1   3 -13    0.13    0.04
   0  -2 -13    0.02    0.02
   2   0 -13   -0.02    0.02
  -2   2 -13   -0.03    0.03
  -2   2 -13    0.00    0.03
   2   0 -13    0.01    0.02
   5  -3 -13   13.23    0.22
  -2   5 -13   13.33    0.31
   5  -3 -13   13.31    0.29
  -2   5 -13   12.93    0.27
  -3   1 -13    0.10    0.04
   1   2 -13    0.08    0.03
   2  -3 -13    0.23    0.03
   1   2 -13    0.14    0.04
   4  -1 -13    1.70    0.09
  -3   4 -13    1.86    0.11
   4  -1 -13    1.72    0.08
   7  -4 -13    2.28    0.09
  -3   7 -13    2.29    0.14
  -3   7 -13    2.31    0.12
   0   4 -13    0.08    0.03
   4  -4 -13    0.00    0.03
   0   4 -13    0.04    0.04
  -4   3 -13    1.59    0.10
   3   1 -13    1.87    0.10
   3   1 -13    1.76    0.09
  -4   6 -13   12.10    0.30
   6  -2 -13   12.00    0.25
   6  -2 -13   11.71    0.30
  -4   9 -13    3.95    0.20
   6  -5 -13    1.22    0.10
  -1   6 -13    1.33    0.09
  -1   6 -13    1.39    0.11
   2   3 -13   13.67    0.29
   3  -5 -13   13.32    0.22
  -5   2 -13   13.09    0.32
   2   3 -13   13.21    0.30
  -3   5  13   13.06    0.21
  -5   5 -13    0.08    0.05
   5   0 -13    0.04    0.04
   5   0 -13    0.03    0.04
   8  -3 -13    0.33    0.06
  -5   8 -13    0.38    0.07
  -5  11 -13    0.60    0.11
  -2   8 -13    3.16    0.18
  -2   8 -13    3.25    0.14
   1   5 -13    1.33    0.11
   1   5 -13    1.24    0.09
   5  -6 -13    1.25    0.08
  -6   4 -13   12.30    0.32
   4   2 -13   12.22    0.30
   4   2 -13   12.14    0.30
  -2   6  13   11.67    0.24
  -6   7 -13    0.10    0.06
   7  -1 -13    0.09    0.07
   7  -1 -13    0.04    0.04
   1   6  13    0.07    0.05
  -6  10 -13    2.89    0.18
   4   6  13    2.68    0.18
  -6  13 -13    0.31    0.10
   7   6  13    0.15    0.10
  -3  10 -13    2.08    0.16
   0   7 -13   -0.01    0.06
   0   7 -13    0.02    0.04
   3   4 -13    2.75    0.14
   3   4 -13    2.35    0.14
  -4   7  13    2.28    0.08
   6   1 -13   -0.02    0.05
   6   1 -13    0.05    0.05
  -7   6 -13   -0.04    0.05
  -1   7  13   -0.04    0.04
   9  -2 -13    1.11    0.13
  -7   9 -13    1.08    0.13
   9  -2 -13    0.91    0.10
   2   7  13    1.07    0.13
  -7  12 -13    0.05    0.07
   5   7  13   -0.03    0.08
   8   7  13    0.14    0.12
  -4  12 -13    0.39    0.11
  -1   9 -13    0.23    0.06
  -1   9 -13    0.12    0.08
   2   6 -13    3.46    0.16
   2   6 -13    3.42    0.18
  -8   5 -13    0.15    0.07
   5   3 -13    0.22    0.07
   5   3 -13    0.22    0.07
  -3   8  13    0.19    0.05
   8   0 -13   -0.05    0.06
  -8   8 -13   -0.02    0.06
   8   0 -13    0.00    0.06
   0   8  13    0.01    0.06
  -8  11 -13    0.02    0.07
   3   8  13   -0.06    0.07
   6   8  13    0.26    0.11
  -5  14 -13    0.64    0.14
   9   5  13    0.77    0.16
  -2  11 -13    0.34    0.10
   1   8 -13    0.10    0.06
   1   8 -13    0.24    0.09
   4   5 -13    4.21    0.21
   4   5 -13    3.90    0.18
   7   2 -13    1.11    0.14
  -9   7 -13    1.02    0.13
   7   2 -13    0.91    0.12
  -2   9  13    0.88    0.11
  -9  10 -13    0.15    0.07
  10  -1 -13    0.14    0.07
  10  -1 -13    0.10    0.08
   1   9  13    0.15    0.08
   4   9  13    0.60    0.14
  16  -7 -13    0.24    0.12
   7   9  13    0.14    0.12
  10   6  13    0.01    0.11
  -3  13 -13    0.37    0.11
   0  10 -13   -0.06    0.07
   3   7 -13    2.00    0.14
   3   7 -13    2.08    0.17
   6   4 -13    2.62    0.17
   6   4 -13    2.86    0.19
 -10   9 -13    0.09    0.07
   9   1 -13    0.14    0.09
   9   1 -13    0.09    0.08
  -1  10  13    0.00    0.07
  12  -2 -13    0.46    0.12
   2  10  13    0.57    0.13
  15  -5 -13   -0.06    0.08
   5  10  13    0.01    0.11
  -4  15 -13    0.08    0.12
  11   4  13    0.00    0.11
  -1  12 -13    0.08    0.11
   2   9 -13    0.27    0.10
   5   6 -13    0.52    0.11
   5   6 -13    0.54    0.10
   8   3 -13    0.03    0.07
 -11   8 -13    0.07    0.08
   8   3 -13    0.02    0.08
  11   0 -13    0.02    0.08
  11   0 -13    0.04    0.09
   0  11  13    0.11    0.09
  14  -3 -13    0.07    0.10
   3  11  13   -0.02    0.10
  -2  14 -13    0.15    0.12
   1  11 -13    0.05    0.10
   4   8 -13    0.40    0.10
   4   8 -13    0.55    0.12
   7   5 -13   -0.07    0.07
   7   5 -13   -0.06    0.07
  10   2 -13    0.71    0.15
  10   2 -13    0.70    0.14
  13  -1 -13    0.26    0.12
   1  12  13    0.18    0.10
   0  13 -13   -0.04    0.11
   3  10 -13    0.39    0.12
   6   7 -13    0.26    0.10
   6   7 -13    0.28    0.11
   9   4 -13    0.71    0.15
   9   4 -13    0.56    0.14
  12   1 -13    0.20    0.12
  12   1 -13    0.00    0.11
  15  -2 -13    0.00    0.12
   2  13  13    0.05    0.13
   2  12 -13    0.02    0.11
   5   9 -13    0.74    0.16
   8   6 -13    0.08    0.11
   8   6 -13    0.36    0.12
  11   3 -13    0.21    0.12
  11   3 -13    0.38    0.14
  14   0 -13    0.21    0.14
   4  11 -13    0.07    0.11
   7   8 -13   -0.01    0.11
  10   5 -13   -0.05    0.10
  10   5 -13   -0.08    0.10
  13   2 -13    0.02    0.12
  13   2 -13   -0.02    0.13
   6  10 -13   -0.13    0.11
   9   7 -13   -0.11    0.12
   0  -1 -14    0.33    0.04
   1   0 -14    0.30    0.04
  -1   1 -14    0.25    0.04
   0  -1 -14    0.28    0.04
  -1   1 -14    0.47    0.06
   1   0 -14    0.33    0.04
   0   2 -14   41.83    0.64
   2  -2 -14   39.69    0.57
   2  -2 -14   40.66    0.60
  -2   0 -14   40.29    0.64
   0   2 -14   40.48    0.62
  -2   3 -14   66.75    0.96
  -2   3 -14   66.99    1.00
   3  -1 -14   67.94    0.93
   3  -1 -14   66.56    0.96
  -1   4 -14   90.33    1.26
  -1   4 -14   90.62    1.31
   4  -3 -14   90.31    1.25
   2   1 -14   66.73    0.96
   1  -3 -14   66.96    0.90
  -3   2 -14   65.90    1.00
   2   1 -14   67.77    0.97
   5  -2 -14   92.83    1.34
   5  -2 -14   95.92    1.29
  -3   5 -14   94.09    1.38
  -3   5 -14   95.17    1.33
  -2   6 -14   46.74    0.73
   6  -4 -14   45.87    0.74
  -2   6 -14   47.67    0.79
   6  -4 -14   46.35    0.64
   1   3 -14   90.71    1.27
   3  -4 -14   90.33    1.21
  -4   1 -14   90.41    1.33
   1   3 -14   89.06    1.30
  -4   4 -14   93.20    1.37
   4   0 -14   93.12    1.34
   4   0 -14   94.59    1.31
   7  -3 -14   20.41    0.43
  -4   7 -14   20.84    0.45
   7  -3 -14   20.72    0.37
  -3   8 -14   16.59    0.35
  -3   8 -14   16.29    0.40
   0   5 -14   58.75    0.88
   5  -5 -14   58.64    0.85
   0   5 -14   58.60    0.94
   3   2 -14   96.33    1.36
   3   2 -14   95.82    1.37
  -5   3 -14   93.45    1.40
   2  -5 -14   93.43    1.23
   6  -1 -14   15.01    0.35
  -5   6 -14   14.66    0.35
   6  -1 -14   15.15    0.32
  -5   9 -14   26.25    0.56
  -4  10 -14   12.94    0.38
   7  -6 -14    0.36    0.07
  -1   7 -14    0.44    0.07
  -1   7 -14    0.40    0.09
   2   4 -14   48.32    0.81
   4  -6 -14   48.48    0.68
   2   4 -14   47.80    0.77
   5   1 -14   15.25    0.34
  -6   5 -14   15.52    0.37
   5   1 -14   15.08    0.36
  -1   6  14   15.45    0.31
   8  -2 -14    3.18    0.18
   8  -2 -14    3.22    0.15
  -6   8 -14    3.38    0.18
  -6  11 -14    4.62    0.23
   5   6  14    4.62    0.24
  -5  12 -14    2.18    0.18
  -2   9 -14    6.75    0.27
  -2   9 -14    6.20    0.20
   1   6 -14    0.32    0.06
   6  -7 -14    0.47    0.06
   1   6 -14    0.42    0.09
  -7   4 -14   21.06    0.47
   4   3 -14   21.46    0.45
   4   3 -14   21.14    0.45
  -3   7  14   20.77    0.36
  -7   7 -14    0.29    0.08
   7   0 -14    0.32    0.09
   7   0 -14    0.34    0.08
   0   7  14    0.21    0.07
  -7  10 -14   11.98    0.36
  10  -3 -14   12.50    0.38
   3   7  14   12.56    0.37
  -7  13 -14    2.81    0.22
   6   7  14    2.54    0.24
  -6  14 -14    0.15    0.11
   8   6  14    0.36    0.14
  -3  11 -14    3.65    0.22
   8  -8 -14    0.38    0.07
   0   8 -14    0.44    0.08
   0   8 -14    0.41    0.09
   3   5 -14   17.11    0.39
   3   5 -14   17.12    0.42
   6   2 -14    3.08    0.17
  -8   6 -14    3.22    0.18
   6   2 -14    3.00    0.17
  -2   8  14    2.87    0.14
   9  -1 -14    4.54    0.20
   9  -1 -14    4.15    0.22
  -8   9 -14    4.26    0.21
   1   8  14    4.13    0.20
  -8  12 -14    3.55    0.22
   4   8  14    3.57    0.23
  15  -7 -14    0.20    0.11
   7   8  14    0.07    0.11
  16  -9 -14    0.08    0.11
   9   7  14    0.16    0.13
  -4  13 -14    1.32    0.18
  -1  10 -14    6.35    0.29
   2   7 -14    6.80    0.23
   2   7 -14    6.57    0.27
   5   4 -14   24.83    0.53
   5   4 -14   25.12    0.55
   8   1 -14    4.48    0.23
   8   1 -14    4.26    0.21
  -9   8 -14    4.43    0.22
  -1   9  14    4.38    0.19
  11  -2 -14    3.74    0.20
  -9  11 -14    3.77    0.21
  11  -2 -14    3.74    0.23
   2   9  14    3.40    0.21
  14  -5 -14    0.43    0.12
   5   9  14    0.47    0.14
  10   5  14   -0.04    0.11
  -2  12 -14    3.14    0.24
   1   9 -14    7.19    0.30
   4   6 -14   12.72    0.39
   4   6 -14   12.76    0.35
   7   3 -14   11.82    0.37
   7   3 -14   12.92    0.39
 -10   7 -14   12.37    0.38
 -10  10 -14    6.66    0.27
  10   0 -14    6.50    0.30
  10   0 -14    6.55    0.27
   0  10  14    6.75    0.27
  13  -3 -14    1.57    0.19
   3  10  14    1.72    0.20
  16  -6 -14    0.35    0.14
   6  10  14    0.29    0.14
  -3  14 -14    0.33    0.12
   0  11 -14    5.10    0.29
   3   8 -14    3.68    0.19
   3   8 -14    3.85    0.23
   6   5 -14    4.53    0.23
   6   5 -14    4.59    0.24
   9   2 -14    3.45    0.22
 -11   9 -14    3.86    0.22
   9   2 -14    3.28    0.22
  12  -1 -14    2.58    0.24
  12  -1 -14    2.33    0.19
   1  11  14    2.31    0.20
  15  -4 -14    0.13    0.12
   4  11  14    0.15    0.14
  -1  13 -14    1.06    0.18
   2  10 -14    3.53    0.25
   5   7 -14    2.22    0.17
   5   7 -14    2.40    0.20
   8   4 -14    3.58    0.24
   8   4 -14    3.26    0.23
  11   1 -14    2.58    0.25
  11   1 -14    2.41    0.22
  14  -2 -14    0.18    0.11
   2  12  14    0.23    0.12
  -2  15 -14    0.01    0.13
  13   2  14   -0.01    0.13
   1  12 -14    1.10    0.18
   4   9 -14    1.21    0.19
   7   6 -14    2.83    0.21
   7   6 -14    2.50    0.25
  10   3 -14    1.88    0.22
  10   3 -14    1.59    0.20
  13   0 -14    0.34    0.14
   0  14 -14    0.15    0.13
   3  11 -14    0.35    0.14
   6   8 -14    0.26    0.12
   9   5 -14    0.30    0.13
   9   5 -14    0.40    0.14
  12   2 -14    0.37    0.13
  12   2 -14    0.39    0.14
   2  13 -14   -0.04    0.13
   5  10 -14    0.24    0.13
   8   7 -14    0.24    0.12
   8   7 -14    0.07    0.12
  11   4 -14   -0.01    0.13
  11   4 -14    0.16    0.14
   7   9 -14    0.33    0.14
  10   6 -14    0.25    0.16
  10   6 -14    0.25    0.15
   0   0 -15   -0.05    0.04
   0   0 -15   -0.03    0.04
  -1   2 -15    3.69    0.14
   2  -1 -15    3.69    0.11
   2  -1 -15    3.75    0.12
  -1  -1 -15    3.62    0.13
  -1   2 -15    3.80    0.13
   1  -2 -15    3.68    0.11
   1  -2 -15    3.79    0.11
  -2   1 -15    3.57    0.14
   1   1 -15    3.84    0.13
  -2   4 -15    0.03    0.04
   4  -2 -15    0.05    0.04
  -2   4 -15    0.05    0.05
   4  -2 -15    0.07    0.03
   3  -3 -15    0.06    0.03
   0   3 -15    0.00    0.04
  -3   0 -15   -0.12    0.05
   0   3 -15    0.06    0.04
   3   0 -15    0.09    0.04
  -3   3 -15    0.02    0.05
   3   0 -15    0.07    0.04
  -3   6 -15   28.94    0.51
   6  -3 -15   29.61    0.53
   6  -3 -15   29.37    0.45
  -3   6 -15   28.72    0.56
  -1   5 -15    5.74    0.18
  -1   5 -15    6.04    0.21
   5  -4 -15    6.18    0.18
   2   2 -15    0.08    0.04
   2   2 -15    0.12    0.05
  -4   2 -15    0.00    0.05
   2  -4 -15    0.06    0.03
   5  -1 -15    6.15    0.20
  -4   5 -15    5.84    0.21
   5  -1 -15    6.13    0.17
  -4   8 -15    0.88    0.12
   8  -4 -15    0.82    0.11
  -2   7 -15    0.59    0.09
  -2   7 -15    0.47    0.07
   7  -5 -15    0.52    0.08
   1   4 -15    6.08    0.21
   1   4 -15    5.85    0.18
   4  -5 -15    5.98    0.15
   4   1 -15    6.54    0.21
   4   1 -15    6.34    0.19
  -5   4 -15    6.19    0.22
   7  -2 -15    0.06    0.06
  -5   7 -15    0.03    0.06
   7  -2 -15    0.05    0.04
  -5  10 -15    3.41    0.20
  -3   9 -15    4.41    0.22
  -3   9 -15    4.51    0.18
   6  -6 -15    0.04    0.04
   0   6 -15    0.02    0.04
   0   6 -15    0.05    0.06
  -6   3 -15   28.97    0.57
   3   3 -15   29.25    0.54
   3  -6 -15   28.77    0.42
   3   3 -15   29.30    0.55
  -3   6  15   29.44    0.44
   6   0 -15    0.11    0.05
   6   0 -15   -0.01    0.06
  -6   6 -15    0.01    0.05
  -6   9 -15    2.11    0.17
   9  -3 -15    2.28    0.17
   9  -3 -15    2.05    0.13
  -6  12 -15    0.03    0.08
   6   6  15    0.00    0.08
  -4  11 -15    0.16    0.09
  -1   8 -15    1.03    0.13
   8  -7 -15    1.10    0.11
  -1   8 -15    1.05    0.10
   5  -7 -15    0.61    0.06
   2   5 -15    0.63    0.10
   2   5 -15    0.48    0.08
  -7   5 -15    0.02    0.06
   5   2 -15    0.12    0.06
   5   2 -15    0.09    0.06
  -2   7  15    0.00    0.04
   8  -1 -15    0.28    0.08
  -7   8 -15    0.51    0.10
   8  -1 -15    0.25    0.09
   1   7  15    0.38    0.09
  -7  11 -15    0.36    0.10
  11  -4 -15    0.38    0.10
   4   7  15    0.25    0.10
  14  -7 -15    0.16    0.10
   7   7  15    0.12    0.11
  -5  13 -15    0.82    0.15
   8   5  15    0.70    0.14
  -2  10 -15    0.13    0.09
   1   7 -15    1.26    0.14
   1   7 -15    1.05    0.11
  -8   4 -15    0.59    0.11
   4   4 -15    0.80    0.10
   4   4 -15    0.94    0.12
   7   1 -15    0.43    0.10
   7   1 -15    0.40    0.09
  -8   7 -15    0.32    0.09
  -1   8  15    0.26    0.08
  10  -2 -15    0.11    0.08
  -8  10 -15   -0.09    0.07
  10  -2 -15    0.09    0.07
   2   8  15    0.07    0.08
  13  -5 -15    0.49    0.12
   5   8  15    0.29    0.12
  16  -8 -15    0.07    0.11
   8   8  15    0.10    0.13
  15  -9 -15    0.20    0.11
   9   6  15    0.26    0.14
  -3  12 -15    0.27    0.10
   0   9 -15    0.17    0.09
   0   9 -15    0.01    0.06
   3   6 -15    4.25    0.22
   3   6 -15    4.53    0.20
   6   3 -15    1.83    0.17
  -9   6 -15    1.67    0.17
   6   3 -15    2.01    0.16
   9   0 -15   -0.01    0.07
   9   0 -15   -0.02    0.07
  -9   9 -15   -0.02    0.07
   0   9  15    0.09    0.07
  12  -3 -15    0.43    0.12
   3   9  15    0.19    0.10
  15  -6 -15    0.15    0.11
   6   9  15    0.08    0.11
  -4  14 -15    0.42    0.14
  10   4  15    0.38    0.14
  -1  11 -15    0.32    0.11
   2   8 -15    0.34    0.08
   2   8 -15    0.16    0.09
   5   5 -15    3.36    0.21
   5   5 -15    3.52    0.19
   8   2 -15    0.04    0.08
 -10   8 -15   -0.03    0.08
   8   2 -15   -0.01    0.07
  11  -1 -15    0.17    0.09
  11  -1 -15    0.14    0.09
   1  10  15    0.24    0.10
  14  -4 -15    0.35    0.12
   4  10  15    0.09    0.11
  11   5  15   -0.07    0.12
  -2  13 -15    0.12    0.12
   1  10 -15    0.45    0.12
   4   7 -15    0.23    0.09
   4   7 -15    0.58    0.12
   7   4 -15    0.39    0.11
   7   4 -15    0.37    0.11
  10   1 -15    0.37    0.11
  10   1 -15    0.24    0.10
 -11  10 -15    0.12    0.09
  13  -2 -15    0.32    0.11
   2  11  15    0.54    0.14
  16  -5 -15    0.10    0.12
   5  11  15   -0.01    0.12
  -3  15 -15    0.04    0.11
  12   3  15    0.15    0.13
   0  12 -15    0.08    0.11
   3   9 -15    0.50    0.13
   6   6 -15    0.07    0.08
   6   6 -15    0.04    0.08
 -12   9 -15    0.18    0.10
   9   3 -15    0.41    0.12
   9   3 -15    0.41    0.12
  12   0 -15    0.09    0.10
  12   0 -15   -0.06    0.09
  15  -3 -15    0.09    0.13
   3  12  15    0.12    0.13
  -1  14 -15    0.04    0.12
   2  11 -15    0.17    0.12
   5   8 -15    0.85    0.16
   8   5 -15    0.37    0.13
   8   5 -15    0.39    0.12
  11   2 -15    0.60    0.15
  11   2 -15    0.69    0.15
  14  -1 -15   -0.06    0.10
   1  13 -15    0.13    0.13
   4  10 -15    0.19    0.12
   7   7 -15    0.20    0.13
   7   7 -15    0.32    0.12
  10   4 -15    0.33    0.14
  10   4 -15    0.19    0.12
  13   1 -15   -0.05    0.11
  13   1 -15   -0.08    0.12
   3  12 -15    0.11    0.12
   6   9 -15    0.28    0.13
   9   6 -15    0.27    0.13
   9   6 -15    0.12    0.12
  12   3 -15    0.01    0.12
  12   3 -15   -0.13    0.12
   5  11 -15    0.13    0.13
   8   8 -15    0.06    0.13
  11   5 -15    0.12    0.14
  11   5 -15   -0.02    0.13
   0   1 -16  263.96    3.46
  -1   0 -16  264.70    3.53
  -1   0 -16  269.75    3.52
   1  -1 -16  264.74    3.53
   0   1 -16  272.05    3.52
   1  -1 -16  268.98    3.52
  -1   3 -16   57.21    0.88
   3  -2 -16   57.94    0.83
   3  -2 -16   55.45    0.79
  -1   3 -16   56.48    0.84
   0  -2 -16   70.38    1.02
  -2   2 -16   71.44    1.06
  -2   2 -16   71.10    1.02
   0  -2 -16   72.09    0.99
   2   0 -16   72.01    1.01
  -2   5 -16    2.94    0.15
   5  -3 -16    2.99    0.13
  -2   5 -16    2.87    0.13
   5  -3 -16    3.04    0.09
   2  -3 -16   56.92    0.80
  -3   1 -16   55.80    0.88
   1   2 -16   56.27    0.86
   1   2 -16   56.15    0.84
   2  -3 -16   57.23    0.78
  -3   4 -16   16.62    0.34
   4  -1 -16   16.22    0.34
   4  -1 -16   16.61    0.31
  -3   4 -16   16.50    0.37
   7  -4 -16   12.18    0.31
  -3   7 -16   12.34    0.34
   7  -4 -16   11.97    0.23
  -3   7 -16   12.57    0.29
   0   4 -16    5.60    0.20
   0   4 -16    5.46    0.18
   4  -4 -16    5.61    0.16
   1  -4 -16   16.57    0.28
   3   1 -16   16.76    0.34
  -4   3 -16   16.40    0.37
   3   1 -16   16.26    0.34
  -4   6 -16   19.49    0.43
   6  -2 -16   18.54    0.41
   6  -2 -16   19.06    0.35
  -4   9 -16    0.82    0.12
   9  -5 -16    1.03    0.11
  -1   6 -16   26.61    0.48
   6  -5 -16   26.84    0.48
  -1   6 -16   26.82    0.54
   2   3 -16    3.00    0.14
   2   3 -16    3.13    0.15
  -5   2 -16    2.81    0.16
   3  -5 -16    2.97    0.10
   5   0 -16   12.22    0.28
  -5   5 -16   10.94    0.30
   5   0 -16   11.53    0.30
   8  -3 -16   11.63    0.26
  -5   8 -16   10.83    0.33
   8  -3 -16   11.11    0.32
  11  -6 -16    3.39    0.20
  -5  11 -16    3.02    0.21
  -2   8 -16   22.16    0.51
  -2   8 -16   22.23    0.44
   8  -6 -16   22.06    0.46
   1   5 -16   25.90    0.49
   5  -6 -16   26.55    0.44
   1   5 -16   26.88    0.53
  -6   4 -16   19.40    0.44
   4   2 -16   18.51    0.40
   4   2 -16   19.26    0.42
  -2   6  16   19.02    0.34
  -6   7 -16   45.36    0.81
   7  -1 -16   46.49    0.76
   7  -1 -16   46.24    0.81
  -6  10 -16    0.30    0.09
  10  -4 -16    0.38    0.09
  13  -7 -16    0.47    0.11
  -6  13 -16    0.47    0.12
   7   6  16    0.47    0.13
  10  -7 -16    1.82    0.15
  -3  10 -16    1.71    0.18
   0   7 -16   47.68    0.87
   7  -7 -16   48.57    0.76
   0   7 -16   49.81    0.79
  -7   3 -16   12.54    0.35
   3   4 -16   12.83    0.34
   3   4 -16   12.48    0.32
  -7   6 -16   45.22    0.82
   6   1 -16   45.87    0.80
   6   1 -16   45.47    0.78
  -1   7  16   45.51    0.73
   9  -2 -16    6.40    0.27
   9  -2 -16    6.23    0.22
  -7   9 -16    6.24    0.26
   2   7  16    6.53    0.25
  12  -5 -16    0.73    0.13
  -7  12 -16    0.85    0.13
   5   7  16    0.77    0.14
  15  -8 -16    0.68    0.15
   8   7  16    0.54    0.15
  12  -8 -16    1.80    0.17
  -4  12 -16    1.64    0.19
  -1   9 -16    7.93    0.31
  -1   9 -16    8.37    0.25
   9  -8 -16    8.03    0.25
   2   6 -16   21.89    0.46
   2   6 -16   21.51    0.50
   5   3 -16   11.41    0.33
  -8   5 -16   12.06    0.35
   5   3 -16   11.28    0.33
  -3   8  16   11.35    0.28
  -8   8 -16   21.49    0.51
   8   0 -16   21.61    0.48
   8   0 -16   21.68    0.52
   0   8  16   21.76    0.47
  11  -3 -16    2.52    0.19
  -8  11 -16    2.12    0.19
   3   8  16    1.88    0.18
  14  -6 -16    1.04    0.16
   6   8  16    0.91    0.17
  -5  14 -16    1.22    0.17
  14  -9 -16    1.10    0.16
   9   5  16    1.18    0.20
  -2  11 -16    0.59    0.13
   1   8 -16    8.13    0.31
   1   8 -16    8.01    0.26
   4   5 -16    0.86    0.12
   4   5 -16    0.98    0.12
   7   2 -16    6.66    0.27
  -9   7 -16    5.83    0.25
   7   2 -16    6.38    0.26
  -2   9  16    6.25    0.22
  10  -1 -16    1.25    0.16
  10  -1 -16    0.99    0.13
  -9  10 -16    1.00    0.14
   1   9  16    1.11    0.14
  13  -4 -16    0.27    0.11
   4   9  16    0.25    0.11
  16  -7 -16    0.18    0.13
   7   9  16    0.05    0.12
  10   6  16    0.12    0.13
  -3  13 -16    0.26    0.11
   0  10 -16    0.08    0.09
   3   7 -16    1.83    0.18
   3   7 -16    1.55    0.14
   6   4 -16    0.23    0.09
   6   4 -16    0.44    0.10
   9   1 -16    1.23    0.15
   9   1 -16    1.23    0.16
 -10   9 -16    1.07    0.14
  -1  10  16    1.08    0.13
  12  -2 -16    0.27    0.11
   2  10  16    0.27    0.10
  15  -5 -16    0.41    0.14
   5  10  16    0.55    0.16
  -4  15 -16    0.45    0.15
  11   4  16    0.16    0.12
  -1  12 -16    0.08    0.10
   2   9 -16    0.72    0.14
   5   6 -16    3.05    0.20
   5   6 -16    3.20    0.21
   8   3 -16    2.27    0.19
 -11   8 -16    2.29    0.20
   8   3 -16    1.83    0.18
  11   0 -16    0.64    0.15
  11   0 -16    0.66    0.13
   0  11  16    0.66    0.13
  14  -3 -16    0.49    0.14
   3  11  16    0.40    0.13
  -2  14 -16    0.20    0.12
   1  11 -16    0.07    0.10
   4   8 -16    1.65    0.16
   4   8 -16    1.60    0.19
   7   5 -16    1.02    0.16
   7   5 -16    0.70    0.14
  10   2 -16    0.34    0.12
  10   2 -16    0.42    0.13
  13  -1 -16    0.19    0.11
   0  13 -16    0.08    0.11
   3  10 -16    0.30    0.12
   6   7 -16    0.37    0.11
   6   7 -16    0.35    0.13
   9   4 -16    0.32    0.12
   9   4 -16    0.47    0.13
  12   1 -16    0.10    0.11
  12   1 -16    0.20    0.12
  15  -2 -16    0.19    0.14
   2  12 -16    0.17    0.13
   5   9 -16    1.12    0.19
   8   6 -16    1.24    0.18
   8   6 -16    1.11    0.18
  11   3 -16    0.60    0.16
  11   3 -16    0.65    0.16
  14   0 -16    0.55    0.17
   4  11 -16    0.34    0.15
   7   8 -16    0.87    0.18
  10   5 -16    0.43    0.16
  10   5 -16    0.85    0.18
  13   2 -16    0.24    0.16
  13   2 -16    0.18    0.15
   6  10 -16    0.13    0.12
   9   7 -16    0.18    0.15
   1   0 -17    0.05    0.04
  -1   1 -17    0.01    0.04
  -1   1 -17    0.08    0.05
   1   0 -17    0.05    0.04
   0  -1 -17    0.03    0.04
   0  -1 -17    0.00    0.04
   2  -2 -17    0.06    0.03
   0   2 -17    0.03    0.04
   0   2 -17    0.05    0.04
   2  -2 -17    0.06    0.04
  -2   0 -17   -0.02    0.04
   3  -1 -17    6.02    0.16
  -2   3 -17    6.05    0.18
  -2   3 -17    6.17    0.20
   3  -1 -17    5.98    0.18
  -1   4 -17    0.36    0.08
   4  -3 -17    0.28    0.04
   4  -3 -17    0.33    0.06
  -1   4 -17    0.33    0.07
   2   1 -17    6.19    0.18
   1  -3 -17    5.94    0.15
   2   1 -17    6.22    0.18
  -3   2 -17    6.10    0.20
   5  -2 -17   19.65    0.40
  -3   5 -17   19.12    0.38
  -3   5 -17   18.82    0.42
   5  -2 -17   19.49    0.34
  -2   6 -17   14.28    0.36
   6  -4 -17   13.84    0.23
   6  -4 -17   14.13    0.32
  -2   6 -17   13.72    0.32
   1   3 -17    0.40    0.07
  -4   1 -17    0.34    0.07
   3  -4 -17    0.32    0.05
   1   3 -17    0.35    0.07
   4   0 -17    0.08    0.05
  -4   4 -17    0.06    0.06
   4   0 -17    0.07    0.05
   7  -3 -17    1.83    0.10
   7  -3 -17    1.86    0.14
  -4   7 -17    1.88    0.15
  -3   8 -17    2.69    0.14
  -3   8 -17    2.94    0.19
   8  -5 -17    2.81    0.16
   0   5 -17    0.02    0.05
   5  -5 -17    0.14    0.05
   0   5 -17    0.11    0.07
  -5   3 -17   18.80    0.42
   3   2 -17   19.38    0.40
   3   2 -17   18.89    0.39
   2  -5 -17   18.43    0.30
   6  -1 -17    1.41    0.11
  -5   6 -17    1.66    0.14
   6  -1 -17    1.69    0.13
   9  -4 -17    2.25    0.16
  -5   9 -17    1.80    0.17
  -4  10 -17    3.81    0.22
  10  -6 -17    3.90    0.20
   7  -6 -17    1.94    0.13
  -1   7 -17    1.61    0.12
  -1   7 -17    1.90    0.17
  -6   2 -17   13.16    0.36
   2   4 -17   13.95    0.33
   2   4 -17   13.47    0.34
   4  -6 -17   13.72    0.25
   5   1 -17    1.57    0.12
  -6   5 -17    1.28    0.13
   5   1 -17    1.66    0.13
   8  -2 -17    1.06    0.13
  -6   8 -17    1.04    0.13
   8  -2 -17    1.12    0.11
  -6  11 -17    0.58    0.12
  11  -5 -17    0.81    0.13
  12  -7 -17    0.18    0.09
  -5  12 -17    0.14    0.10
  -2   9 -17    1.52    0.13
  -2   9 -17    1.27    0.15
   9  -7 -17    1.44    0.13
   6  -7 -17    1.81    0.10
   1   6 -17    1.87    0.13
   1   6 -17    2.03    0.16
  -7   4 -17    1.51    0.15
   4   3 -17    1.88    0.14
   4   3 -17    2.07    0.14
  -3   7  17    1.68    0.09
  -7   7 -17    0.06    0.08
   7   0 -17    0.09    0.07
   7   0 -17    0.07    0.06
  -7  10 -17    0.64    0.12
  10  -3 -17    0.64    0.12
   3   7  17    0.65    0.11
  13  -6 -17    0.25    0.11
  -7  13 -17    0.09    0.10
   6   7  17    0.24    0.12
  14  -8 -17    0.55    0.13
  -6  14 -17    0.54    0.13
   8   6  17    0.46    0.14
  11  -8 -17    0.15    0.08
  -3  11 -17    0.17    0.09
   8  -8 -17    0.03    0.06
   0   8 -17    0.02    0.06
   0   8 -17    0.02    0.08
   3   5 -17    3.04    0.18
   3   5 -17    2.94    0.17
   6   2 -17    0.90    0.12
   6   2 -17    0.87    0.11
  -8   6 -17    0.89    0.13
  -2   8  17    0.97    0.10
   9  -1 -17    0.03    0.06
  -8   9 -17   -0.06    0.07
   9  -1 -17    0.11    0.07
   1   8  17   -0.06    0.06
  -8  12 -17    0.05    0.09
  12  -4 -17    0.05    0.08
   4   8  17    0.06    0.09
  15  -7 -17   -0.10    0.09
   7   8  17    0.17    0.13
  16  -9 -17    0.03    0.11
   9   7  17    0.09    0.12
  13  -9 -17    0.82    0.14
  -4  13 -17    0.58    0.14
  -1  10 -17    0.25    0.10
   2   7 -17    1.40    0.15
   2   7 -17    1.59    0.13
   5   4 -17    1.57    0.15
  -9   5 -17    1.74    0.17
   5   4 -17    1.84    0.15
  -9   8 -17   -0.03    0.07
   8   1 -17   -0.03    0.07
   8   1 -17    0.05    0.07
  -1   9  17    0.09    0.07
  -9  11 -17    0.16    0.09
  11  -2 -17    0.23    0.10
   2   9  17    0.32    0.10
  14  -5 -17    0.07    0.09
   5   9  17    0.00    0.10
  -5  15 -17    0.10    0.11
  10   5  17    0.16    0.12
  -2  12 -17    0.39    0.12
   1   9 -17    0.21    0.10
   1   9 -17    0.21    0.09
   4   6 -17    3.91    0.23
   4   6 -17    3.68    0.20
   7   3 -17    0.58    0.12
 -10   7 -17    0.67    0.12
   7   3 -17    0.55    0.11
  10   0 -17    0.13    0.09
  10   0 -17    0.08    0.08
 -10  10 -17    0.15    0.09
   0  10  17    0.01    0.07
  13  -3 -17    0.15    0.11
   3  10  17    0.33    0.12
  16  -6 -17    0.08    0.12
   6  10  17    0.22    0.14
  -3  14 -17    0.24    0.12
   0  11 -17    0.13    0.11
   3   8 -17    0.02    0.07
   3   8 -17    0.07    0.07
   6   5 -17    0.70    0.13
   6   5 -17    0.37    0.10
 -11   9 -17    0.13    0.09
   9   2 -17    0.22    0.10
   9   2 -17    0.21    0.11
  12  -1 -17    0.32    0.12
   1  11  17    0.31    0.11
  15  -4 -17   -0.13    0.10
   4  11  17   -0.08    0.11
  -1  13 -17    0.06    0.12
   2  10 -17    0.27    0.11
   5   7 -17    0.11    0.09
   5   7 -17    0.26    0.11
   8   4 -17    0.15    0.10
   8   4 -17    0.14    0.10
  11   1 -17    0.33    0.13
  11   1 -17    0.16    0.12
  14  -2 -17    0.20    0.13
   2  12  17    0.14    0.12
  -2  15 -17   -0.02    0.12
   1  12 -17    0.07    0.12
   4   9 -17    0.72    0.16
   7   6 -17    0.06    0.10
   7   6 -17    0.16    0.11
  10   3 -17    0.42    0.14
  10   3 -17    0.39    0.13
  13   0 -17    0.02    0.11
   0  14 -17    0.06    0.12
   3  11 -17    0.18    0.12
   6   8 -17    0.27    0.13
   9   5 -17    0.11    0.12
   9   5 -17    0.10    0.12
  12   2 -17    0.17    0.13
  12   2 -17    0.13    0.12
   2  13 -17    0.03    0.14
   5  10 -17    0.26    0.13
   8   7 -17    0.00    0.11
   8   7 -17    0.08    0.11
  11   4 -17   -0.01    0.12
  11   4 -17   -0.03    0.11
   7   9 -17   -0.04    0.11
  10   6 -17    0.30    0.16
  10   6 -17    0.27    0.16
   0   0 -18   15.84    0.31
   0   0 -18   15.05    0.30
   2  -1 -18    4.94    0.16
   2  -1 -18    5.18    0.15
  -1   2 -18    4.83    0.16
  -1   2 -18    5.09    0.18
  -1  -1 -18    5.09    0.15
  -1  -1 -18    5.25    0.17
   1  -2 -18    4.96    0.14
   1  -2 -18    5.00    0.15
   1   1 -18    4.60    0.16
  -2   1 -18    4.62    0.16
   1   1 -18    4.93    0.16
   4  -2 -18   47.27    0.73
   4  -2 -18   44.73    0.67
  -2   4 -18   45.69    0.77
  -2   4 -18   47.01    0.73
  -3   0 -18   84.94    1.26
   0   3 -18   84.24    1.24
   3  -3 -18   82.87    1.13
   0   3 -18   85.49    1.21
   3  -3 -18   84.39    1.17
   3   0 -18   91.88    1.29
  -3   3 -18   90.45    1.34
   3   0 -18   90.95    1.30
  -3   6 -18   36.24    0.66
  -3   6 -18   35.78    0.61
   6  -3 -18   34.28    0.62
   6  -3 -18   35.38    0.54
  -1   5 -18   61.91    1.00
  -1   5 -18   62.18    0.94
   5  -4 -18   61.96    0.93
   2   2 -18   47.01    0.75
   2   2 -18   45.58    0.74
  -4   2 -18   46.64    0.78
   2  -4 -18   46.05    0.67
   5  -1 -18   50.92    0.82
  -4   5 -18   49.74    0.84
   5  -1 -18   49.79    0.76
   8  -4 -18   15.56    0.39
  -4   8 -18   16.76    0.42
  -2   7 -18    2.73    0.17
  -2   7 -18    2.75    0.15
   7  -5 -18    2.76    0.16
   1   4 -18   62.14    0.95
   4  -5 -18   62.61    0.89
   1   4 -18   61.69    0.99
  -5   1 -18   62.55    1.02
   4   1 -18   49.12    0.79
  -5   4 -18   48.65    0.84
   4   1 -18   50.78    0.82
   7  -2 -18    1.59    0.14
   7  -2 -18    1.77    0.11
  -5   7 -18    1.76    0.16
  10  -5 -18    9.41    0.32
  -5  10 -18    9.32    0.33
   9  -6 -18    7.96    0.27
  -3   9 -18    7.43    0.24
  -3   9 -18    7.73    0.30
   0   6 -18    1.15    0.13
   0   6 -18    1.08    0.11
   6  -6 -18    1.08    0.10
   3  -6 -18   36.04    0.53
  -6   3 -18   36.67    0.69
   3   3 -18   36.85    0.66
   3   3 -18   37.13    0.65
  -3   6  18   36.67    0.54
  -6   6 -18    2.35    0.16
   6   0 -18    2.20    0.13
   6   0 -18    2.46    0.15
  -6   9 -18   11.35    0.36
   9  -3 -18   11.25    0.35
  12  -6 -18    1.27    0.15
  -6  12 -18    1.11    0.16
  11  -7 -18    1.35    0.15
  -4  11 -18    1.41    0.17
   8  -7 -18    0.21    0.07
  -1   8 -18    0.24    0.08
  -1   8 -18    0.13    0.07
   2   5 -18    2.69    0.17
   2   5 -18    2.80    0.16
   5  -7 -18    2.65    0.12
   5   2 -18    1.67    0.14
   5   2 -18    1.66    0.14
  -7   5 -18    1.65    0.16
  -2   7  18    1.72    0.10
  -7   8 -18    0.06    0.08
   8  -1 -18    0.04    0.07
   8  -1 -18    0.04    0.08
  11  -4 -18    2.43    0.19
  -7  11 -18    2.62    0.21
   4   7  18    2.73    0.20
  14  -7 -18    0.01    0.09
  -7  14 -18    0.15    0.11
   7   7  18    0.15    0.11
  13  -8 -18    0.56    0.13
  -5  13 -18    0.39    0.12
  10  -8 -18    2.82    0.17
  -2  10 -18    2.41    0.20
   1   7 -18    0.08    0.07
   1   7 -18    0.13    0.08
   4   4 -18   16.51    0.42
   4   4 -18   16.56    0.41
  -8   4 -18   16.55    0.44
  -8   7 -18    0.14    0.08
   7   1 -18    0.04    0.07
   7   1 -18    0.07    0.07
  -1   8  18    0.07    0.06
  10  -2 -18    3.99    0.23
  -8  10 -18    3.69    0.22
   2   8  18    3.86    0.21
  13  -5 -18    1.37    0.18
  -8  13 -18    1.25    0.17
   5   8  18    1.42    0.18
  16  -8 -18    0.01    0.11
   8   8  18    0.06    0.12
  15  -9 -18   -0.03    0.10
   9   6  18   -0.02    0.10
  -3  12 -18    1.19    0.17
   0   9 -18    2.70    0.21
   0   9 -18    3.04    0.17
   3   6 -18    7.67    0.27
   3   6 -18    7.92    0.30
   6   3 -18   11.02    0.35
   6   3 -18   10.97    0.35
  -9   6 -18   11.21    0.36
   9   0 -18    4.89    0.23
   9   0 -18    5.27    0.26
  -9   9 -18    5.08    0.25
   0   9  18    5.26    0.23
  12  -3 -18    2.19    0.21
  -9  12 -18    2.24    0.20
   3   9  18    2.75    0.22
  15  -6 -18    0.07    0.11
   6   9  18    0.06    0.11
  -4  14 -18    0.10    0.11
  -1  11 -18    2.80    0.23
   2   8 -18    2.63    0.19
   2   8 -18    2.80    0.17
   5   5 -18    9.72    0.32
   5   5 -18    9.57    0.34
   8   2 -18    3.81    0.22
   8   2 -18    4.08    0.24
 -10   8 -18    3.58    0.22
  11  -1 -18    2.12    0.21
 -10  11 -18    2.10    0.20
   1  10  18    2.20    0.18
  14  -4 -18    0.28    0.13
   4  10  18    0.08    0.11
  -2  13 -18    0.76    0.16
   1  10 -18    2.68    0.23
   4   7 -18    1.30    0.17
   4   7 -18    1.24    0.14
   7   4 -18    2.92    0.21
   7   4 -18    2.51    0.20
 -11  10 -18    1.90    0.19
  10   1 -18    1.89    0.20
  10   1 -18    1.78    0.19
  13  -2 -18    0.73    0.15
   2  11  18    0.94    0.16
  -3  15 -18    0.07    0.12
   0  12 -18    1.50    0.21
   3   9 -18    1.17    0.18
   6   6 -18    1.34    0.18
   6   6 -18    1.44    0.17
   9   3 -18    2.07    0.21
 -12   9 -18    2.15    0.21
   9   3 -18    2.45    0.24
  12   0 -18    0.75    0.16
  15  -3 -18    0.04    0.13
   3  12  18    0.05    0.12
  -1  14 -18    0.06    0.13
   2  11 -18    1.08    0.18
   5   8 -18    0.67    0.15
   5   8 -18    0.47    0.12
   8   5 -18    1.28    0.18
   8   5 -18    1.27    0.19
  11   2 -18    1.07    0.19
  11   2 -18    0.77    0.16
  14  -1 -18   -0.02    0.12
   1  13 -18    0.17    0.14
   4  10 -18    0.12    0.12
   7   7 -18    0.13    0.10
   7   7 -18    0.09    0.11
  10   4 -18    0.03    0.11
  10   4 -18    0.28    0.13
  13   1 -18    0.08    0.13
   3  12 -18    0.07    0.13
   6   9 -18    0.04    0.12
   9   6 -18    0.03    0.12
   9   6 -18    0.01    0.12
  12   3 -18    0.09    0.13
  12   3 -18    0.13    0.14
   8   8 -18    0.19    0.15
   0   1 -19   -0.02    0.04
   0   1 -19   -0.05    0.04
   1  -1 -19   -0.05    0.04
   1  -1 -19   -0.04    0.03
  -1   0 -19    0.03    0.04
  -1   0 -19    0.06    0.05
  -1   3 -19    0.54    0.08
   3  -2 -19    0.67    0.06
  -1   3 -19    0.58    0.08
   3  -2 -19    0.68    0.08
  -2  -1 -19    0.75    0.09
   0  -2 -19    0.10    0.04
  -2   2 -19    0.04    0.05
  -2   2 -19   -0.01    0.04
   2   0 -19    0.01    0.04
   2   0 -19   -0.02    0.05
   5  -3 -19   16.79    0.35
   5  -3 -19   16.10    0.28
  -2   5 -19   16.38    0.35
  -2   5 -19   15.68    0.39
   2  -3 -19    0.65    0.06
   1   2 -19    0.59    0.08
   1   2 -19    0.53    0.07
  -3   1 -19    0.72    0.09
   2  -3 -19    0.63    0.06
  -3   4 -19    0.06    0.05
  -3   4 -19    0.09    0.06
   4  -1 -19    0.06    0.05
   4  -1 -19    0.02    0.04
   7  -4 -19    0.99    0.11
  -3   7 -19    0.87    0.12
  -3   7 -19    0.90    0.10
   0   4 -19   -0.06    0.05
   0   4 -19   -0.16    0.05
   4  -4 -19   -0.03    0.04
   1  -4 -19    0.13    0.04
   3   1 -19    0.11    0.06
   3   1 -19    0.04    0.05
  -4   3 -19    0.19    0.06
   6  -2 -19   14.86    0.36
  -4   6 -19   15.44    0.38
   6  -2 -19   15.13    0.30
  -4   9 -19    2.07    0.19
   9  -5 -19    2.29    0.16
  -1   6 -19    1.87    0.15
  -1   6 -19    1.94    0.13
   6  -5 -19    2.05    0.13
   2   3 -19   16.21    0.37
  -5   2 -19   15.95    0.39
   3  -5 -19   16.10    0.29
   2   3 -19   16.10    0.36
   5   0 -19    0.07    0.06
   5   0 -19   -0.02    0.05
  -5   5 -19   -0.07    0.06
   8  -3 -19    0.14    0.08
  -5   8 -19    0.16    0.08
  -5  11 -19    0.38    0.11
  11  -6 -19    0.37    0.10
  -2   8 -19    3.12    0.20
  -2   8 -19    2.93    0.16
   8  -6 -19    2.97    0.16
   1   5 -19    2.06    0.13
   1   5 -19    1.85    0.15
   5  -6 -19    1.96    0.10
   4   2 -19   15.21    0.37
   4   2 -19   15.24    0.36
  -6   4 -19   15.30    0.39
   7  -1 -19    0.09    0.06
   7  -1 -19    0.21    0.08
  -6   7 -19    0.05    0.08
  10  -4 -19    0.85    0.13
  -6  10 -19    1.05    0.14
  -6  13 -19    0.12    0.11
  13  -7 -19    0.31    0.11
   7   6  19    0.47    0.12
  10  -7 -19    1.45    0.15
  -3  10 -19    1.41    0.13
  -3  10 -19    1.29    0.16
   7  -7 -19   -0.10    0.05
   0   7 -19    0.02    0.07
   0   7 -19   -0.01    0.06
   3   4 -19    1.02    0.12
   3   4 -19    0.92    0.12
  -7   3 -19    1.06    0.13
   6   1 -19    0.11    0.07
   6   1 -19    0.10    0.07
  -7   6 -19    0.13    0.08
  -1   7  19    0.17    0.06
   9  -2 -19    0.18    0.09
   9  -2 -19    0.11    0.07
  -7   9 -19    0.10    0.09
  12  -5 -19    0.05    0.09
  -7  12 -19    0.00    0.09
   5   7  19    0.08    0.09
  15  -8 -19    0.32    0.12
   8   7  19   -0.03    0.10
  -4  12 -19    0.37    0.12
  12  -8 -19    0.44    0.11
  -1   9 -19    0.12    0.09
   9  -8 -19   -0.06    0.06
  -1   9 -19    0.00    0.06
   2   6 -19    2.54    0.18
   2   6 -19    2.77    0.16
   5   3 -19    0.11    0.07
  -8   5 -19    0.08    0.08
   5   3 -19    0.08    0.07
   8   0 -19   -0.07    0.06
  -8   8 -19    0.02    0.07
   8   0 -19   -0.01    0.07
   0   8  19    0.10    0.07
  -8  11 -19   -0.03    0.08
  11  -3 -19    0.03    0.08
   3   8  19    0.12    0.08
  14  -6 -19    0.33    0.12
   6   8  19    0.09    0.11
  14  -9 -19    0.83    0.15
  -5  14 -19    0.57    0.15
  -2  11 -19    0.43    0.12
   1   8 -19   -0.06    0.07
   1   8 -19    0.05    0.07
   4   5 -19    2.27    0.18
   4   5 -19    1.96    0.16
  -9   7 -19    0.25    0.09
   7   2 -19    0.16    0.09
   7   2 -19    0.15    0.09
  -9  10 -19    0.09    0.09
  10  -1 -19    0.19    0.09
  10  -1 -19    0.08    0.09
   1   9  19    0.09    0.08
  13  -4 -19    0.26    0.12
   4   9  19    0.34    0.12
  16  -7 -19    0.11    0.12
   7   9  19    0.20    0.13
  10   6  19    0.02    0.12
  -3  13 -19    0.18    0.12
   0  10 -19    0.06    0.10
   3   7 -19    1.42    0.15
   3   7 -19    1.43    0.18
   6   4 -19    1.00    0.14
 -10   6 -19    1.10    0.15
   6   4 -19    0.96    0.14
   9   1 -19    0.17    0.10
   9   1 -19   -0.01    0.08
 -10   9 -19    0.06    0.09
 -10  12 -19    0.55    0.13
  12  -2 -19    0.61    0.14
   2  10  19    0.81    0.14
  15  -5 -19   -0.04    0.11
   5  10  19   -0.03    0.10
  -4  15 -19   -0.02    0.11
  -1  12 -19    0.07    0.11
   2   9 -19    0.46    0.13
   5   6 -19    0.32    0.10
   5   6 -19    0.36    0.10
   8   3 -19    0.13    0.09
 -11   8 -19   -0.07    0.07
   8   3 -19   -0.07    0.08
 -11  11 -19    0.01    0.09
  11   0 -19    0.08    0.09
  11   0 -19    0.05    0.08
  14  -3 -19    0.16    0.11
   3  11  19    0.16    0.11
  -2  14 -19    0.11    0.11
   1  11 -19    0.09    0.11
   4   8 -19    0.29    0.10
   4   8 -19    0.51    0.14
   7   5 -19    0.10    0.10
   7   5 -19   -0.03    0.09
 -12  10 -19    0.62    0.14
  10   2 -19    0.56    0.14
  10   2 -19    0.55    0.15
  13  -1 -19    0.02    0.12
   0  13 -19    0.06    0.12
   3  10 -19    0.39    0.14
   6   7 -19    0.21    0.11
   6   7 -19    0.41    0.13
   9   4 -19    0.33    0.13
   9   4 -19    0.37    0.12
  12   1 -19    0.13    0.12
  12   1 -19    0.12    0.12
   2  12 -19    0.06    0.13
   5   9 -19    0.58    0.16
   8   6 -19    0.12    0.12
   8   6 -19    0.18    0.12
  11   3 -19    0.09    0.12
  11   3 -19    0.07    0.12
  14   0 -19    0.00    0.13
   4  11 -19   -0.07    0.11
   7   8 -19    0.25    0.13
  10   5 -19    0.10    0.13
  10   5 -19    0.11    0.13
   6  10 -19    0.22    0.14
   9   7 -19   -0.01    0.13
   9   7 -19    0.18    0.15
   1   0 -20   38.47    0.61
   1   0 -20   37.77    0.61
  -1   1 -20   38.47    0.62
  -1   1 -20   37.99    0.64
   0  -1 -20   37.98    0.60
   0  -1 -20   38.90    0.62
  -2   0 -20   28.84    0.53
   0   2 -20   29.13    0.52
   0   2 -20   29.27    0.51
   2  -2 -20   28.72    0.46
   2  -2 -20   29.11    0.48
  -2   3 -20    5.22    0.19
   3  -1 -20    5.30    0.18
   3  -1 -20    5.22    0.15
  -2   3 -20    5.19    0.17
   4  -3 -20    2.76    0.09
   4  -3 -20    2.76    0.13
  -1   4 -20    2.89    0.16
  -1   4 -20    2.76    0.13
  -3   2 -20    5.27    0.19
   1  -3 -20    5.38    0.15
   1  -3 -20    5.43    0.15
   2   1 -20    5.58    0.18
   2   1 -20    5.23    0.18
  -3   5 -20    0.51    0.08
   5  -2 -20    0.48    0.07
   5  -2 -20    0.33    0.08
  -3   5 -20    0.49    0.09
  -2   6 -20    0.23    0.08
  -2   6 -20    0.34    0.07
   6  -4 -20    0.35    0.08
   1   3 -20    3.10    0.14
  -4   1 -20    3.19    0.16
   1   3 -20    2.77    0.15
   3  -4 -20    2.75    0.12
   4   0 -20    4.69    0.17
  -4   4 -20    4.88    0.20
   4   0 -20    4.56    0.18
   7  -3 -20    0.94    0.08
  -4   7 -20    1.12    0.14
   7  -3 -20    0.90    0.11
   8  -5 -20    0.02    0.07
  -3   8 -20    0.05    0.06
  -3   8 -20   -0.07    0.07
   5  -5 -20    0.08    0.05
   0   5 -20    0.03    0.05
   0   5 -20    0.10    0.06
  -5   3 -20    0.59    0.10
   3   2 -20    0.43    0.08
   2  -5 -20    0.45    0.05
   3   2 -20    0.35    0.08
  -5   6 -20    5.31    0.23
   6  -1 -20    5.27    0.18
   6  -1 -20    5.78    0.22
  -5   9 -20    1.10    0.15
   9  -4 -20    1.32    0.15
  10  -6 -20    0.39    0.10
  -4  10 -20    0.32    0.11
  -1   7 -20   15.56    0.41
   7  -6 -20   14.59    0.34
  -1   7 -20   15.17    0.36
  -6   2 -20    0.41    0.08
   2   4 -20    0.25    0.07
   2   4 -20    0.26    0.07
   4  -6 -20    0.35    0.05
  -6   5 -20    5.86    0.24
   5   1 -20    5.59    0.22
   5   1 -20    5.52    0.20
   8  -2 -20    4.90    0.23
   8  -2 -20    4.83    0.18
  -6   8 -20    4.86    0.23
  -6  11 -20   -0.02    0.08
  11  -5 -20    0.03    0.08
  -5  12 -20   -0.12    0.08
  12  -7 -20   -0.18    0.07
  -2   9 -20    0.97    0.13
  -2   9 -20    1.21    0.12
   9  -7 -20    1.11    0.13
   1   6 -20   14.84    0.41
   1   6 -20   14.90    0.36
   6  -7 -20   15.26    0.31
   4   3 -20    0.84    0.11
  -7   4 -20    1.03    0.13
   4   3 -20    0.84    0.11
   7   0 -20   18.83    0.46
   7   0 -20   18.30    0.41
  -7   7 -20   18.23    0.46
  10  -3 -20    0.11    0.08
  -7  10 -20    0.13    0.09
  -7  13 -20   -0.01    0.09
  13  -6 -20    0.03    0.09
   6   7  20    0.01    0.10
  -6  14 -20    0.20    0.12
  14  -8 -20    0.17    0.11
   8   6  20    0.26    0.13
  -3  11 -20    0.07    0.09
  11  -8 -20    0.01    0.07
   0   8 -20    3.84    0.22
   0   8 -20    3.97    0.19
   3   5 -20   -0.01    0.07
   3   5 -20   -0.09    0.06
   6   2 -20    5.22    0.23
  -8   6 -20    5.27    0.24
   6   2 -20    4.80    0.23
  -2   8  20    5.09    0.20
   9  -1 -20    0.44    0.09
   9  -1 -20    0.44    0.11
  -8   9 -20    0.45    0.10
   1   8  20    0.39    0.09
  12  -4 -20    0.26    0.11
  -8  12 -20    0.19    0.10
   4   8  20    0.18    0.10
  15  -7 -20   -0.10    0.10
   7   8  20   -0.01    0.10
  16  -9 -20    0.13    0.12
   9   7  20    0.21    0.14
  -4  13 -20    0.16    0.11
  -1  10 -20    0.47    0.13
   2   7 -20    1.00    0.12
   2   7 -20    1.24    0.15
   5   4 -20    1.22    0.15
   5   4 -20    1.23    0.14
  -9   5 -20    1.47    0.16
  -9   8 -20    0.42    0.10
   8   1 -20    0.24    0.10
   8   1 -20    0.48    0.11
  -1   9  20    0.54    0.09
  -9  11 -20    0.04    0.09
  11  -2 -20   -0.12    0.06
   2   9  20    0.06    0.08
  14  -5 -20    0.14    0.12
   5   9  20    0.11    0.11
  -5  15 -20   -0.04    0.12
  10   5  20    0.14    0.12
  -2  12 -20    0.25    0.11
   1   9 -20    0.14    0.08
   1   9 -20    0.05    0.09
   4   6 -20    0.32    0.10
   4   6 -20    0.36    0.10
   7   3 -20    0.12    0.09
 -10   7 -20    0.29    0.10
   7   3 -20    0.06    0.09
 -10  10 -20    0.03    0.08
  10   0 -20    0.18    0.09
  10   0 -20    0.16    0.09
   0  10  20    0.21    0.09
  13  -3 -20   -0.05    0.09
   3  10  20    0.07    0.10
  -3  14 -20    0.07    0.11
   0  11 -20    1.04    0.17
   3   8 -20    0.07    0.08
   3   8 -20   -0.05    0.08
   6   5 -20   -0.07    0.08
   6   5 -20   -0.04    0.07
   9   2 -20    0.10    0.09
   9   2 -20    0.13    0.10
 -11   9 -20   -0.05    0.08
  12  -1 -20    0.15    0.10
  15  -4 -20    0.04    0.12
   4  11  20   -0.01    0.11
  -1  13 -20    0.22    0.13
   2  10 -20    0.31    0.12
   5   7 -20    0.01    0.10
   5   7 -20    0.03    0.09
   8   4 -20    0.13    0.11
   8   4 -20    0.26    0.11
  11   1 -20    0.03    0.11
  11   1 -20    0.07    0.11
  14  -2 -20    0.01    0.11
   1  12 -20    0.26    0.14
   4   9 -20    0.15    0.10
   7   6 -20   -0.12    0.09
   7   6 -20   -0.12    0.09
  10   3 -20    0.12    0.11
  10   3 -20    0.12    0.11
  13   0 -20    0.09    0.12
   3  11 -20   -0.06    0.11
   6   8 -20    0.15    0.11
   6   8 -20    0.00    0.11
   9   5 -20   -0.01    0.11
   9   5 -20    0.02    0.11
  12   2 -20    0.01    0.12
  12   2 -20   -0.11    0.12
   5  10 -20    0.10    0.13
   8   7 -20    0.09    0.12
   8   7 -20    0.01    0.11
  11   4 -20    0.01    0.11
  11   4 -20    0.14    0.14
   7   9 -20    0.20    0.13
   0   0 -21    0.00    0.03
   0   0 -21    0.00    0.03
   2  -1 -21    0.60    0.06
  -1   2 -21    0.60    0.07
  -1  -1 -21    0.73    0.08
  -1   2 -21    0.52    0.07
   2  -1 -21    0.58    0.07
  -1  -1 -21    0.64    0.07
   1   1 -21    0.60    0.08
   1  -2 -21    0.65    0.07
   1  -2 -21    0.61    0.07
  -2   1 -21    0.62    0.08
  -2   1 -21    0.56    0.07
   1   1 -21    0.58    0.07
  -2   4 -21    0.09    0.05
   4  -2 -21    0.13    0.06
  -2   4 -21    0.22    0.05
   4  -2 -21    0.16    0.04
   3  -3 -21    0.00    0.03
   0   3 -21   -0.12    0.04
  -3   0 -21    0.03    0.04
   3  -3 -21   -0.06    0.03
   0   3 -21   -0.02    0.03
  -3   3 -21    0.03    0.04
   0  -3 -21   -0.02    0.03
  -3   3 -21   -0.06    0.04
   3   0 -21   -0.06    0.03
   3   0 -21    0.12    0.05
  -3   6 -21   14.51    0.38
  -3   6 -21   14.66    0.34
   6  -3 -21   14.28    0.27
   6  -3 -21   15.08    0.35
   5  -4 -21   10.65    0.26
  -1   5 -21   10.82    0.28
   5  -4 -21   10.51    0.19
  -1   5 -21   10.71    0.31
   2   2 -21    0.07    0.05
   2  -4 -21    0.09    0.04
   2   2 -21    0.07    0.05
  -4   2 -21    0.14    0.05
   5  -1 -21   12.35    0.28
  -4   5 -21   12.61    0.34
   5  -1 -21   12.14    0.32
  -4   8 -21   -0.03    0.05
  -4   8 -21    0.04    0.06
   8  -4 -21    0.02    0.06
  -2   7 -21    0.34    0.10
   7  -5 -21    0.38    0.08
  -2   7 -21    0.28    0.07
   4  -5 -21   10.88    0.24
  -5   1 -21   10.43    0.31
   1   4 -21   10.17    0.29
   1   4 -21   10.48    0.28
  -5   4 -21   12.84    0.35
   4   1 -21   11.93    0.30
   4   1 -21   12.28    0.32
   7  -2 -21    0.03    0.05
  -5   7 -21   -0.01    0.06
   7  -2 -21    0.03    0.07
  -5  10 -21    1.66    0.18
  10  -5 -21    2.05    0.17
  -3   9 -21    3.35    0.17
   9  -6 -21    3.21    0.18
  -3   9 -21    3.22    0.21
   6  -6 -21   -0.10    0.04
   0   6 -21   -0.10    0.05
   0   6 -21   -0.10    0.07
  -6   3 -21   14.50    0.38
   3   3 -21   14.28    0.36
   3   3 -21   14.68    0.36
   3  -6 -21   14.34    0.26
   6   0 -21   -0.09    0.04
  -6   6 -21    0.01    0.06
   6   0 -21   -0.11    0.05
  -6   9 -21    0.83    0.13
   9  -3 -21    0.70    0.12
  12  -6 -21   -0.09    0.07
  -6  12 -21   -0.02    0.09
  11  -7 -21    0.24    0.09
  -4  11 -21    0.12    0.10
  -1   8 -21    0.31    0.08
  -1   8 -21    0.23    0.09
   8  -7 -21    0.29    0.08
   2   5 -21    0.24    0.08
   2   5 -21    0.35    0.08
   5   2 -21   -0.04    0.06
   5   2 -21    0.01    0.06
  -7   5 -21    0.12    0.07
  -2   7  21    0.01    0.05
  -7   8 -21   -0.13    0.06
   8  -1 -21    0.00    0.07
   8  -1 -21   -0.13    0.05
  -7  11 -21    0.27    0.10
  11  -4 -21    0.03    0.08
  14  -7 -21    0.08    0.10
  -7  14 -21   -0.01    0.10
   7   7  21    0.10    0.12
  13  -8 -21    0.56    0.13
  -5  13 -21    0.46    0.13
  -2  10 -21    0.08    0.08
  10  -8 -21   -0.14    0.06
  -2  10 -21    0.00    0.06
   1   7 -21    0.46    0.10
   1   7 -21    0.13    0.09
   4   4 -21   -0.02    0.05
   4   4 -21    0.01    0.08
  -8   4 -21    0.17    0.08
   7   1 -21   -0.06    0.06
  -8   7 -21    0.09    0.08
   7   1 -21    0.12    0.08
  -1   8  21   -0.02    0.05
  10  -2 -21   -0.04    0.07
  -8  10 -21    0.02    0.08
   2   8  21   -0.01    0.07
  13  -5 -21   -0.08    0.09
  -8  13 -21    0.11    0.10
   5   8  21    0.01    0.09
  16  -8 -21    0.31    0.14
   8   8  21    0.18    0.13
  15  -9 -21    0.12    0.12
  -6  15 -21    0.01    0.12
   9   6  21    0.21    0.13
  -3  12 -21    0.30    0.12
   0   9 -21   -0.03    0.08
   0   9 -21   -0.13    0.06
   3   6 -21    3.37    0.21
   3   6 -21    3.47    0.19
   6   3 -21    0.76    0.12
   6   3 -21    0.52    0.10
  -9   6 -21    0.97    0.14
   9   0 -21   -0.09    0.07
  -9   9 -21    0.04    0.08
   9   0 -21    0.01    0.07
   0   9  21    0.04    0.06
  12  -3 -21    0.26    0.11
  -9  12 -21    0.42    0.12
   3   9  21    0.58    0.13
  15  -6 -21    0.04    0.11
   6   9  21   -0.01    0.10
  -4  14 -21    0.24    0.12
  -1  11 -21    0.02    0.10
   2   8 -21    0.07    0.07
   2   8 -21   -0.02    0.08
   5   5 -21    1.98    0.18
   5   5 -21    2.05    0.20
 -10   8 -21    0.04    0.07
   8   2 -21   -0.04    0.07
   8   2 -21    0.00    0.08
 -10  11 -21    0.37    0.12
  11  -1 -21    0.27    0.11
   1  10  21    0.47    0.11
  14  -4 -21   -0.06    0.10
   4  10  21    0.06    0.10
  -2  13 -21    0.09    0.11
   1  10 -21   -0.05    0.10
   4   7 -21   -0.03    0.07
   4   7 -21   -0.12    0.08
 -11   7 -21    0.28    0.10
   7   4 -21    0.09    0.09
   7   4 -21    0.20    0.10
  10   1 -21    0.27    0.11
 -11  10 -21    0.27    0.11
  10   1 -21    0.26    0.11
  13  -2 -21    0.02    0.09
   2  11  21    0.28    0.11
  -3  15 -21   -0.01    0.13
   0  12 -21    0.06    0.12
   3   9 -21    0.26    0.11
   6   6 -21    0.02    0.09
   6   6 -21   -0.06    0.08
   9   3 -21    0.28    0.12
   9   3 -21    0.46    0.13
 -12   9 -21    0.28    0.11
  12   0 -21    0.15    0.12
  15  -3 -21    0.00    0.11
  -1  14 -21    0.01    0.12
   2  11 -21    0.10    0.12
   5   8 -21    0.49    0.14
   5   8 -21    0.35    0.11
   8   5 -21    0.13    0.11
   8   5 -21    0.07    0.11
  11   2 -21    0.11    0.11
  11   2 -21    0.02    0.11
  14  -1 -21    0.03    0.12
   1  13 -21   -0.05    0.12
   4  10 -21    0.28    0.14
   7   7 -21    0.09    0.11
   7   7 -21    0.02    0.11
  10   4 -21   -0.05    0.12
  10   4 -21    0.25    0.14
  13   1 -21   -0.14    0.12
   3  12 -21    0.16    0.15
   6   9 -21    0.22    0.14
   9   6 -21   -0.03    0.12
   9   6 -21    0.03    0.12
  12   3 -21   -0.08    0.13
  12   3 -21   -0.03    0.12
   8   8 -21    0.15    0.15
   1  -1 -22    6.13    0.17
  -1   0 -22    6.34    0.18
   0   1 -22    5.81    0.19
   0   1 -22    6.46    0.19
   1  -1 -22    6.07    0.18
  -1   0 -22    6.22    0.19
   3  -2 -22    2.96    0.13
   3  -2 -22    3.00    0.11
  -1   3 -22    3.16    0.13
  -2  -1 -22    3.18    0.14
  -1   3 -22    2.99    0.14
  -2   2 -22    0.03    0.04
   2   0 -22    0.00    0.03
   0  -2 -22    0.04    0.03
  -2   2 -22    0.06    0.03
   2   0 -22    0.00    0.03
   0  -2 -22    0.02    0.03
   5  -3 -22   11.62    0.29
   5  -3 -22   11.88    0.23
  -2   5 -22   11.64    0.29
  -2   5 -22   11.85    0.32
   2  -3 -22    2.92    0.12
   2  -3 -22    3.05    0.11
  -3   1 -22    2.86    0.14
   1   2 -22    3.04    0.14
   1   2 -22    2.94    0.14
   4  -1 -22   11.73    0.26
   4  -1 -22   11.53    0.29
  -3   4 -22   12.01    0.32
  -3   4 -22   11.57    0.29
   7  -4 -22    0.24    0.08
  -3   7 -22    0.29    0.08
  -3   7 -22    0.52    0.08
   0   4 -22   13.36    0.34
   0   4 -22   13.48    0.32
  -4   0 -22   13.85    0.35
   4  -4 -22   13.48    0.23
   4  -4 -22   13.22    0.29
   1  -4 -22   11.36    0.24
  -4   3 -22   11.31    0.31
   3   1 -22   11.59    0.28
   3   1 -22   11.85    0.30
  -4   6 -22    1.02    0.12
   6  -2 -22    1.19    0.09
   6  -2 -22    0.83    0.11
   9  -5 -22    3.00    0.18
  -4   9 -22    2.90    0.16
  -4   9 -22    2.69    0.19
  -1   6 -22   -0.08    0.04
  -1   6 -22   -0.02    0.04
   6  -5 -22   -0.09    0.04
  -5   2 -22   11.78    0.33
   2   3 -22   11.27    0.30
   3  -5 -22   11.49    0.24
   2   3 -22   11.60    0.31
   5   0 -22    0.57    0.08
  -5   5 -22    0.55    0.09
   5   0 -22    0.67    0.10
  -5   8 -22    0.12    0.07
   8  -3 -22    0.10    0.07
  11  -6 -22   -0.07    0.07
  -5  11 -22   -0.03    0.08
   8  -6 -22    0.79    0.11
  -2   8 -22    0.68    0.12
  -2   8 -22    0.98    0.11
   1   5 -22   -0.01    0.05
   1   5 -22    0.01    0.07
   5  -6 -22   -0.10    0.03
  -6   4 -22    0.91    0.12
   4   2 -22    0.71    0.10
   4   2 -22    0.86    0.10
   7  -1 -22    5.77    0.20
  -6   7 -22    5.61    0.24
   7  -1 -22    5.49    0.23
  10  -4 -22    1.37    0.16
  -6  10 -22    1.57    0.18
  -6  13 -22   -0.06    0.09
  13  -7 -22   -0.07    0.09
  -3  10 -22    0.35    0.08
  10  -7 -22    0.24    0.09
  -3  10 -22    0.14    0.09
   0   7 -22   11.94    0.37
   0   7 -22   11.95    0.32
   7  -7 -22   11.79    0.29
   3   4 -22    0.13    0.08
   3   4 -22    0.28    0.08
  -7   3 -22    0.52    0.10
   6   1 -22    5.91    0.22
   6   1 -22    5.72    0.24
  -7   6 -22    5.78    0.25
   9  -2 -22   -0.08    0.07
  -7   9 -22   -0.02    0.07
  12  -5 -22    0.27    0.11
  -7  12 -22    0.35    0.12
  -7  15 -22    0.04    0.11
  15  -8 -22    0.07    0.12
   8   7  22    0.11    0.12
  -4  12 -22   -0.04    0.09
  12  -8 -22    0.06    0.09
  -1   9 -22   -0.03    0.06
  -1   9 -22   -0.01    0.07
   2   6 -22    0.97    0.14
   2   6 -22    0.88    0.12
  -8   5 -22    0.03    0.07
   5   3 -22    0.06    0.07
   5   3 -22    0.07    0.08
   8   0 -22    1.62    0.16
   8   0 -22    1.54    0.14
  -8   8 -22    1.86    0.18
   0   8  22    1.74    0.14
  11  -3 -22    0.09    0.09
  -8  11 -22    0.23    0.11
   3   8  22    0.20    0.09
  -8  14 -22    0.13    0.11
  14  -6 -22   -0.11    0.09
   6   8  22    0.09    0.11
  -5  14 -22    0.11    0.12
  -2  11 -22    0.11    0.10
   1   8 -22    0.07    0.07
   1   8 -22   -0.01    0.08
   4   5 -22    2.94    0.18
   4   5 -22    2.81    0.19
  -9   7 -22    0.05    0.07
   7   2 -22   -0.06    0.07
   7   2 -22   -0.01    0.07
  10  -1 -22    0.30    0.10
  -9  10 -22    0.38    0.11
   1   9  22    0.46    0.10
  -9  13 -22    0.14    0.11
  13  -4 -22    0.01    0.09
   4   9  22    0.22    0.12
  -3  13 -22   -0.06    0.10
   0  10 -22    0.66    0.14
   3   7 -22    0.06    0.07
   3   7 -22    0.15    0.09
   6   4 -22    1.99    0.19
   6   4 -22    1.47    0.16
 -10   6 -22    1.44    0.17
 -10   9 -22    0.53    0.12
   9   1 -22    0.32    0.10
   9   1 -22    0.52    0.13
  12  -2 -22    0.21    0.10
 -10  12 -22    0.37    0.12
   2  10  22    0.41    0.11
  15  -5 -22    0.00    0.11
   5  10  22   -0.04    0.11
  -4  15 -22   -0.01    0.12
  -1  12 -22    0.79    0.17
   2   9 -22    0.34    0.10
   2   9 -22    0.30    0.12
   5   6 -22   -0.01    0.08
   5   6 -22   -0.06    0.07
 -11   8 -22    0.28    0.10
   8   3 -22    0.18    0.09
   8   3 -22    0.23    0.10
  11   0 -22    0.20    0.12
 -11  11 -22    0.20    0.11
  14  -3 -22   -0.03    0.10
   3  11  22   -0.06    0.10
  -2  14 -22   -0.11    0.11
   1  11 -22    0.76    0.16
   4   8 -22    0.11    0.10
   4   8 -22   -0.05    0.08
   7   5 -22    0.52    0.14
   7   5 -22    0.20    0.11
 -12  10 -22    0.16    0.10
  10   2 -22    0.28    0.13
  10   2 -22    0.43    0.13
  13  -1 -22   -0.06    0.10
   0  13 -22   -0.03    0.12
   3  10 -22   -0.03    0.11
   6   7 -22    0.02    0.09
   6   7 -22   -0.01    0.10
   9   4 -22   -0.06    0.10
   9   4 -22    0.05    0.11
  12   1 -22    0.06    0.10
   2  12 -22    0.01    0.13
   5   9 -22    0.17    0.13
   8   6 -22   -0.11    0.10
   8   6 -22    0.03    0.11
  11   3 -22   -0.14    0.11
  11   3 -22    0.06    0.13
   4  11 -22   -0.10    0.10
   7   8 -22   -0.17    0.10
  10   5 -22    0.16    0.13
  10   5 -22    0.05    0.12
  -1   1 -23    0.00    0.03
   0  -1 -23   -0.01    0.03
   1   0 -23   -0.02    0.03
   1   0 -23   -0.04    0.02
   0  -1 -23    0.00    0.03
  -1   1 -23   -0.02    0.03
   0   2 -23    0.02    0.03
   0   2 -23   -0.02    0.03
  -2   0 -23   -0.02    0.03
   2  -2 -23   -0.03    0.02
   2  -2 -23   -0.02    0.02
  -1  -2 -23    0.45    0.07
  -2   3 -23    0.49    0.08
   3  -1 -23    0.55    0.06
  -2   3 -23    0.61    0.08
   3  -1 -23    0.53    0.07
   4  -3 -23    0.41    0.05
  -1   4 -23    0.37    0.08
   4  -3 -23    0.34    0.06
  -1   4 -23    0.46    0.07
   1  -3 -23    0.48    0.06
  -3   2 -23    0.61    0.09
   1  -3 -23    0.54    0.06
   2   1 -23    0.48    0.08
   2   1 -23    0.54    0.07
   5  -2 -23   18.50    0.40
   5  -2 -23   18.09    0.34
  -3   5 -23   18.10    0.43
  -3   5 -23   18.31    0.40
  -2   6 -23    8.22    0.28
   6  -4 -23    8.22    0.25
  -2   6 -23    8.52    0.25
  -4   1 -23    0.31    0.07
   1   3 -23    0.27    0.06
   1   3 -23    0.36    0.08
   3  -4 -23    0.48    0.05
   3  -4 -23    0.34    0.05
   4   0 -23    0.01    0.04
  -4   4 -23    0.02    0.05
   4   0 -23    0.01    0.05
  -4   7 -23    1.23    0.12
  -4   7 -23    1.07    0.13
   7  -3 -23    1.07    0.11
  -3   8 -23    0.37    0.08
  -3   8 -23    0.26    0.09
   8  -5 -23    0.39    0.09
   5  -5 -23   -0.07    0.03
   0   5 -23   -0.04    0.05
   0   5 -23   -0.06    0.04
   3   2 -23   17.81    0.40
   2  -5 -23   17.97    0.32
   3   2 -23   17.90    0.40
  -5   3 -23   17.64    0.43
   6  -1 -23    0.94    0.11
  -5   6 -23    1.04    0.13
   6  -1 -23    1.23    0.11
   9  -4 -23    0.71    0.11
  -5   9 -23    0.43    0.10
  -4  10 -23    2.75    0.20
  10  -6 -23    2.69    0.18
  -4  10 -23    2.71    0.16
  -1   7 -23    1.38    0.15
  -1   7 -23    1.87    0.13
   7  -6 -23    1.56    0.12
  -6   2 -23    8.25    0.29
   2   4 -23    8.61    0.26
   4  -6 -23    7.97    0.20
   2   4 -23    7.65    0.27
   5   1 -23    1.21    0.13
   5   1 -23    1.10    0.11
  -6   5 -23    1.20    0.14
   8  -2 -23   -0.17    0.06
  -6   8 -23   -0.01    0.07
   8  -2 -23   -0.08    0.05
  -6  11 -23    0.40    0.11
  11  -5 -23    0.33    0.10
  -5  12 -23    0.04    0.10
  12  -7 -23    0.03    0.09
   9  -7 -23    0.49    0.09
  -2   9 -23    0.41    0.09
  -2   9 -23    0.34    0.10
   1   6 -23    1.81    0.15
   1   6 -23    1.77    0.13
   4   3 -23    1.02    0.12
  -7   4 -23    1.34    0.14
   4   3 -23    1.23    0.13
   7   0 -23   -0.11    0.05
   7   0 -23   -0.01    0.06
  -7   7 -23    0.00    0.06
  10  -3 -23    0.31    0.10
  -7  10 -23    0.51    0.12
  -7  13 -23    0.01    0.09
  13  -6 -23    0.00    0.09
   6   7  23    0.07    0.10
  -6  14 -23    0.27    0.12
  14  -8 -23    0.11    0.11
  11  -8 -23   -0.03    0.07
  -3  11 -23   -0.08    0.08
   0   8 -23   -0.08    0.08
   0   8 -23   -0.11    0.05
   3   5 -23    0.40    0.09
   3   5 -23    0.21    0.08
   6   2 -23   -0.02    0.06
   6   2 -23   -0.07    0.05
  -8   6 -23   -0.07    0.06
  -8   9 -23    0.04    0.07
   9  -1 -23   -0.09    0.05
   9  -1 -23   -0.16    0.05
   1   8  23   -0.10    0.06
  12  -4 -23    0.05    0.08
  -8  12 -23    0.07    0.09
   4   8  23    0.10    0.09
  15  -7 -23   -0.02    0.10
   7   8  23    0.01    0.12
  -4  13 -23    0.55    0.14
  -1  10 -23    0.00    0.08
   2   7 -23    0.45    0.12
   2   7 -23    0.63    0.11
   5   4 -23    0.68    0.12
  -9   5 -23    0.67    0.12
   5   4 -23    0.75    0.13
  -9   8 -23   -0.08    0.06
   8   1 -23   -0.14    0.06
   8   1 -23   -0.12    0.06
  -9  11 -23    0.29    0.10
  11  -2 -23    0.29    0.10
   2   9  23    0.19    0.09
  14  -5 -23   -0.02    0.10
   5   9  23   -0.04    0.10
  -5  15 -23    0.03    0.12
  -2  12 -23    0.28    0.12
   1   9 -23   -0.09    0.06
   1   9 -23   -0.09    0.08
   4   6 -23    2.26    0.19
   4   6 -23    2.38    0.18
 -10   7 -23    0.44    0.11
   7   3 -23    0.34    0.09
   7   3 -23    0.42    0.11
 -10  10 -23    0.10    0.09
  10   0 -23   -0.04    0.07
  10   0 -23   -0.09    0.08
  13  -3 -23    0.13    0.11
   3  10  23    0.13    0.10
  -3  14 -23    0.11    0.11
   0  11 -23   -0.05    0.09
   3   8 -23   -0.08    0.07
   3   8 -23   -0.01    0.07
   6   5 -23    0.32    0.10
   6   5 -23    0.33    0.11
   9   2 -23    0.26    0.12
   9   2 -23    0.29    0.11
 -11   9 -23    0.23    0.10
 -11  12 -23   -0.03    0.09
  12  -1 -23    0.18    0.11
  15  -4 -23    0.00    0.11
   4  11  23    0.05    0.11
  -1  13 -23    0.01    0.11
   2  10 -23    0.23    0.12
   5   7 -23    0.02    0.10
   5   7 -23    0.19    0.10
 -12   8 -23    0.18    0.10
   8   4 -23    0.08    0.11
   8   4 -23   -0.02    0.09
  11   1 -23    0.07    0.11
  11   1 -23    0.11    0.10
 -12  11 -23    0.22    0.11
  14  -2 -23    0.10    0.13
   1  12 -23    0.01    0.12
   4   9 -23    0.36    0.14
   7   6 -23   -0.05    0.09
   7   6 -23   -0.05    0.09
  10   3 -23    0.05    0.11
  10   3 -23    0.04    0.11
 -13  10 -23    0.27    0.12
  13   0 -23    0.02    0.12
   3  11 -23   -0.06    0.11
   6   8 -23    0.32    0.15
   6   8 -23    0.16    0.12
   9   5 -23   -0.02    0.11
   9   5 -23    0.06    0.12
  12   2 -23    0.06    0.12
  12   2 -23    0.11    0.13
   5  10 -23    0.14    0.13
   8   7 -23    0.13    0.14
   8   7 -23   -0.12    0.10
  11   4 -23    0.04    0.13
  11   4 -23    0.05    0.14
   0   0 -24   15.46    0.33
   0   0 -24   15.86    0.34
   2  -1 -24    0.11    0.04
   2  -1 -24    0.03    0.03
  -1   2 -24    0.14    0.05
  -1  -1 -24    0.13    0.05
  -1   2 -24    0.12    0.05
  -1  -1 -24    0.05    0.04
   1   1 -24    0.10    0.04
   1  -2 -24    0.07    0.04
   1  -2 -24    0.11    0.04
  -2   1 -24    0.09    0.04
  -2   1 -24    0.08    0.04
   1   1 -24    0.10    0.04
  -2   4 -24   17.04    0.37
  -2   4 -24   17.49    0.41
   4  -2 -24   16.99    0.37
   4  -2 -24   17.31    0.32
   0   3 -24    8.89    0.26
   0   3 -24    9.17    0.25
   3  -3 -24    9.50    0.24
   3  -3 -24    9.08    0.20
  -3   0 -24    9.56    0.28
   0  -3 -24    8.45    0.21
  -3   3 -24    8.76    0.25
   3   0 -24    8.46    0.23
  -3   3 -24    8.67    0.27
   3   0 -24    8.53    0.24
   6  -3 -24    5.33    0.16
  -3   6 -24    5.34    0.23
   6  -3 -24    5.29    0.20
  -3   6 -24    5.58    0.20
  -1   5 -24    9.80    0.27
  -1   5 -24    9.50    0.30
   5  -4 -24    9.53    0.26
   2  -4 -24   17.64    0.33
   2   2 -24   17.72    0.39
  -4   2 -24   16.89    0.41
   2   2 -24   17.30    0.39
   5  -1 -24    5.00    0.17
  -4   5 -24    5.13    0.22
   5  -1 -24    4.91    0.20
  -4   8 -24    2.19    0.14
   8  -4 -24    1.92    0.14
  -4   8 -24    1.85    0.16
  -2   7 -24    0.05    0.07
  -2   7 -24    0.00    0.05
   7  -5 -24   -0.07    0.05
   1   4 -24    9.39    0.29
   1   4 -24   10.10    0.28
  -5   1 -24    9.89    0.31
   4  -5 -24    9.91    0.24
  -5   4 -24    5.36    0.22
   4   1 -24    5.01    0.19
   4   1 -24    4.95    0.20
   7  -2 -24    0.14    0.05
   7  -2 -24    0.04    0.06
  -5   7 -24    0.12    0.07
  10  -5 -24    1.50    0.16
  -5  10 -24    1.43    0.17
  -3   9 -24    1.12    0.15
  -3   9 -24    1.18    0.12
   9  -6 -24    0.83    0.11
   0   6 -24    1.48    0.12
   0   6 -24    1.70    0.16
   6  -6 -24    1.28    0.10
   3   3 -24    5.35    0.21
   3  -6 -24    5.32    0.15
   3   3 -24    5.28    0.22
  -6   3 -24    5.69    0.24
  -6   6 -24    1.78    0.14
   6   0 -24    1.32    0.13
   6   0 -24    1.45    0.11
   9  -3 -24    2.01    0.16
  -6   9 -24    1.86    0.18
  12  -6 -24    0.20    0.10
  -6  12 -24    0.22    0.11
  -4  11 -24   -0.01    0.08
  11  -7 -24    0.14    0.08
  -1   8 -24    2.15    0.17
   8  -7 -24    2.10    0.14
  -1   8 -24    2.43    0.16
   2   5 -24   -0.01    0.05
   2   5 -24   -0.06    0.06
  -7   5 -24    0.14    0.07
   5   2 -24    0.10    0.06
   5   2 -24    0.13    0.07
   8  -1 -24    1.55    0.13
  -7   8 -24    2.00    0.19
   8  -1 -24    1.56    0.15
  -7  11 -24    0.99    0.15
  11  -4 -24    0.80    0.13
  -7  14 -24   -0.09    0.09
  14  -7 -24   -0.02    0.09
   7   7  24   -0.02    0.09
  -5  13 -24   -0.04    0.09
  13  -8 -24   -0.02    0.09
  -2  10 -24   -0.03    0.08
  -2  10 -24    0.08    0.07
   1   7 -24    2.06    0.17
   1   7 -24    2.02    0.15
  -8   4 -24    1.97    0.16
   4   4 -24    1.84    0.15
   4   4 -24    1.98    0.16
   7   1 -24    1.30    0.14
  -8   7 -24    1.58    0.17
   7   1 -24    1.69    0.14
  10  -2 -24    0.24    0.10
  -8  10 -24    0.23    0.09
   2   8  24    0.12    0.08
  13  -5 -24   -0.01    0.09
  -8  13 -24    0.18    0.11
   5   8  24    0.10    0.11
  -6  15 -24    0.15    0.13
   9   6  24    0.10    0.12
  -3  12 -24    0.39    0.12
   0   9 -24    0.31    0.09
   0   9 -24    0.16    0.09
   3   6 -24    0.80    0.12
   3   6 -24    0.75    0.12
   6   3 -24    1.92    0.17
   6   3 -24    1.74    0.17
  -9   6 -24    1.68    0.18
  -9   9 -24    0.22    0.10
   9   0 -24    0.12    0.08
   9   0 -24    0.25    0.10
  12  -3 -24    0.42    0.12
  -9  12 -24    0.63    0.13
   3   9  24    0.50    0.12
  15  -6 -24   -0.01    0.10
   6   9  24    0.01    0.11
  -4  14 -24    0.03    0.11
  -1  11 -24    0.62    0.14
   2   8 -24    0.04    0.07
   2   8 -24    0.00    0.08
   5   5 -24    1.25    0.15
   5   5 -24    1.39    0.16
   8   2 -24    0.30    0.10
   8   2 -24    0.24    0.09
 -10   8 -24    0.25    0.09
  11  -1 -24    0.37    0.11
 -10  11 -24    0.43    0.13
  14  -4 -24   -0.08    0.10
   4  10  24   -0.10    0.09
  -2  13 -24    0.26    0.13
   1  10 -24    0.95    0.17
   4   7 -24    0.12    0.09
   4   7 -24    0.00    0.07
   7   4 -24    0.92    0.15
 -11   7 -24    0.89    0.14
   7   4 -24    0.81    0.14
  10   1 -24    0.31    0.11
  10   1 -24    0.35    0.13
 -11  10 -24    0.60    0.13
  13  -2 -24    0.07    0.10
   0  12 -24    0.67    0.18
   3   9 -24    0.20    0.10
   3   9 -24    0.16    0.11
   6   6 -24    0.26    0.11
   6   6 -24    0.15    0.11
   9   3 -24    0.64    0.14
 -12   9 -24    0.65    0.14
   9   3 -24    0.25    0.12
  12   0 -24    0.24    0.12
  -1  14 -24    0.04    0.12
   2  11 -24    0.14    0.13
   5   8 -24   -0.05    0.08
   5   8 -24   -0.04    0.10
   8   5 -24    0.00    0.10
   8   5 -24   -0.04    0.09
  11   2 -24    0.15    0.12
  11   2 -24    0.20    0.12
  14  -1 -24   -0.13    0.12
   1  13 -24   -0.17    0.10
   4  10 -24   -0.06    0.11
   7   7 -24    0.05    0.10
   7   7 -24   -0.11    0.11
  10   4 -24   -0.04    0.11
  10   4 -24   -0.06    0.12
  13   1 -24   -0.14    0.12
   6   9 -24    0.18    0.14
   9   6 -24   -0.03    0.12
   9   6 -24   -0.01    0.12
  -1   0 -25    0.02    0.04
   0   1 -25   -0.01    0.04
   0   1 -25   -0.04    0.03
   1  -1 -25    0.01    0.03
  -1   0 -25   -0.01    0.03
   1  -1 -25    0.04    0.03
  -1   3 -25    0.64    0.08
   3  -2 -25    0.75    0.07
   3  -2 -25    0.84    0.09
  -1   3 -25    0.79    0.09
  -2  -1 -25    0.70    0.09
   2   0 -25    0.01    0.03
  -2   2 -25   -0.01    0.03
  -2   2 -25   -0.03    0.04
   2   0 -25   -0.02    0.03
   0  -2 -25   -0.02    0.03
   0  -2 -25    0.01    0.03
  -2   5 -25    9.75    0.27
   5  -3 -25    9.07    0.26
   5  -3 -25    9.36    0.21
  -2   5 -25    9.00    0.29
   2  -3 -25    0.74    0.08
  -3   1 -25    0.78    0.10
   1   2 -25    0.83    0.09
   1   2 -25    0.67    0.09
   2  -3 -25    0.65    0.07
  -3   4 -25    6.80    0.24
  -3   4 -25    7.13    0.23
   4  -1 -25    6.81    0.19
   4  -1 -25    6.81    0.22
  -3   7 -25    0.90    0.12
  -3   7 -25    1.18    0.12
   7  -4 -25    1.28    0.13
  -4   0 -25    0.04    0.05
   4  -4 -25   -0.02    0.03
   0   4 -25   -0.03    0.04
   0   4 -25   -0.04    0.04
   4  -4 -25   -0.04    0.03
   1  -4 -25    6.60    0.18
  -4   3 -25    7.18    0.25
   3   1 -25    6.67    0.21
   3   1 -25    6.42    0.22
   6  -2 -25    3.53    0.14
   6  -2 -25    3.34    0.17
  -4   6 -25    3.80    0.18
  -4   6 -25    3.47    0.19
  -4   9 -25    1.46    0.14
   9  -5 -25    1.81    0.16
  -4   9 -25    1.60    0.17
  -1   6 -25    0.43    0.09
  -1   6 -25    0.61    0.09
   6  -5 -25    0.35    0.07
   2   3 -25    8.97    0.27
  -5   2 -25    9.30    0.30
   2   3 -25    8.77    0.27
   3  -5 -25    8.90    0.22
   5   0 -25    0.01    0.05
   5   0 -25   -0.08    0.04
  -5   5 -25   -0.06    0.04
  -5   8 -25   -0.09    0.05
   8  -3 -25   -0.02    0.05
  11  -6 -25    0.45    0.10
  -5  11 -25    0.32    0.10
  -2   8 -25    2.18    0.17
   8  -6 -25    2.09    0.14
  -2   8 -25    2.38    0.15
   5  -6 -25    0.55    0.07
   1   5 -25    0.53    0.09
   1   5 -25    0.49    0.10
   4   2 -25    3.40    0.17
  -6   4 -25    3.83    0.20
   4   2 -25    3.35    0.17
  -6   7 -25    0.29    0.09
   7  -1 -25    0.34    0.09
   7  -1 -25    0.32    0.07
  10  -4 -25    1.11    0.14
  -6  10 -25    1.11    0.15
  -6  13 -25    0.07    0.11
  13  -7 -25    0.14    0.10
  10  -7 -25    0.94    0.12
  -3  10 -25    0.90    0.14
  -3  10 -25    1.01    0.12
   7  -7 -25   -0.07    0.05
   0   7 -25   -0.02    0.05
   0   7 -25   -0.05    0.07
   3   4 -25    1.27    0.14
   3   4 -25    1.11    0.13
  -7   3 -25    1.63    0.17
  -7   6 -25    0.44    0.10
   6   1 -25    0.21    0.08
   6   1 -25    0.33    0.08
  -7   9 -25   -0.01    0.07
   9  -2 -25   -0.02    0.07
  12  -5 -25   -0.09    0.07
  -7  12 -25   -0.02    0.09
  15  -8 -25    0.12    0.11
  -7  15 -25    0.22    0.13
   8   7  25   -0.08    0.11
  -4  12 -25    0.28    0.12
  12  -8 -25    0.39    0.11
  -1   9 -25   -0.01    0.06
  -1   9 -25   -0.08    0.05
   2   6 -25    2.19    0.20
   2   6 -25    2.22    0.15
   5   3 -25   -0.04    0.05
   5   3 -25   -0.04    0.06
  -8   5 -25    0.07    0.07
  -8   8 -25    0.09    0.07
   8   0 -25   -0.05    0.06
   8   0 -25   -0.17    0.05
  -8  11 -25   -0.15    0.07
  11  -3 -25   -0.07    0.07
   3   8  25    0.02    0.08
  14  -6 -25    0.03    0.10
  -8  14 -25   -0.04    0.10
   6   8  25   -0.07    0.09
  -5  14 -25    0.60    0.15
  -2  11 -25    0.00    0.08
   1   8 -25   -0.15    0.07
   1   8 -25   -0.12    0.05
   4   5 -25    1.84    0.18
   4   5 -25    1.51    0.15
   7   2 -25    0.00    0.06
   7   2 -25    0.04    0.07
  -9   7 -25    0.13    0.08
  10  -1 -25   -0.08    0.07
  -9  10 -25   -0.04    0.07
   1   9  25   -0.06    0.06
  13  -4 -25   -0.04    0.09
  -9  13 -25    0.05    0.10
   4   9  25   -0.02    0.10
  -3  13 -25    0.15    0.11
   0  10 -25   -0.06    0.08
   3   7 -25    1.08    0.14
   3   7 -25    0.67    0.13
   6   4 -25    1.25    0.15
 -10   6 -25    1.43    0.18
   6   4 -25    1.16    0.16
 -10   9 -25    0.05    0.08
   9   1 -25   -0.02    0.07
   9   1 -25   -0.06    0.07
 -10  12 -25    0.54    0.14
  12  -2 -25    0.31    0.12
   2  10  25    0.40    0.12
  15  -5 -25   -0.10    0.10
   5  10  25   -0.11    0.12
  -4  15 -25    0.05    0.13
  -1  12 -25    0.09    0.11
   2   9 -25    0.04    0.08
   2   9 -25   -0.05    0.09
   5   6 -25    0.61    0.12
   5   6 -25    0.32    0.11
   8   3 -25   -0.01    0.07
 -11   8 -25   -0.02    0.08
   8   3 -25   -0.18    0.07
 -11  11 -25   -0.01    0.09
  11   0 -25   -0.04    0.09
  14  -3 -25    0.10    0.12
  -2  14 -25    0.01    0.12
   1  11 -25    0.01    0.10
   4   8 -25    0.36    0.12
   4   8 -25    0.34    0.11
   7   5 -25   -0.04    0.09
   7   5 -25    0.06    0.10
 -12  10 -25    0.48    0.14
  10   2 -25    0.22    0.12
  10   2 -25    0.41    0.13
  13  -1 -25    0.02    0.11
   0  13 -25   -0.05    0.10
   3  10 -25    0.20    0.14
   6   7 -25    0.27    0.13
   6   7 -25    0.25    0.11
   9   4 -25    0.24    0.12
   9   4 -25    0.11    0.12
  12   1 -25   -0.12    0.10
   2  12 -25   -0.05    0.12
   5   9 -25    0.45    0.15
   8   6 -25   -0.11    0.10
   8   6 -25    0.05    0.12
  11   3 -25   -0.05    0.12
  11   3 -25   -0.03    0.12
   4  11 -25   -0.14    0.12
   7   8 -25   -0.11    0.11
   7   8 -25    0.10    0.13
  10   5 -25   -0.23    0.11
  10   5 -25   -0.09    0.13
   1   0 -26   15.67    0.35
  -1   1 -26   15.63    0.35
   0  -1 -26   15.69    0.34
   1   0 -26   15.81    0.34
   0  -1 -26   15.19    0.34
  -1   1 -26   15.51    0.36
   0   2 -26    0.25    0.06
  -2   0 -26    0.27    0.06
   2  -2 -26    0.28    0.06
   2  -2 -26    0.30    0.05
   0   2 -26    0.17    0.05
  -2   0 -26    0.36    0.06
   3  -1 -26    2.43    0.12
  -1  -2 -26    2.55    0.13
  -2   3 -26    2.46    0.13
   3  -1 -26    2.44    0.13
  -2   3 -26    2.50    0.15
  -1   4 -26    6.81    0.22
   4  -3 -26    6.54    0.21
   4  -3 -26    6.70    0.17
  -1   4 -26    6.78    0.24
  -3  -1 -26    6.89    0.24
   2   1 -26    2.30    0.13
  -3   2 -26    2.52    0.15
   2   1 -26    2.36    0.13
   1  -3 -26    2.45    0.11
   1  -3 -26    2.52    0.12
   5  -2 -26    8.16    0.21
  -3   5 -26    7.89    0.25
   5  -2 -26    8.14    0.25
  -3   5 -26    8.49    0.28
   6  -4 -26    1.48    0.12
  -2   6 -26    1.51    0.12
  -2   6 -26    1.49    0.15
   3  -4 -26    6.71    0.17
   1   3 -26    6.66    0.23
  -4   1 -26    7.31    0.25
   3  -4 -26    6.73    0.20
   1   3 -26    6.88    0.23
  -4   4 -26    3.22    0.17
   4   0 -26    3.01    0.15
   4   0 -26    3.17    0.14
  -4   7 -26    0.60    0.10
  -4   7 -26    0.60    0.09
   7  -3 -26    0.53    0.09
  -3   8 -26    0.74    0.10
   8  -5 -26    0.63    0.10
  -3   8 -26    0.64    0.11
   0   5 -26    2.95    0.15
   5  -5 -26    2.67    0.13
   0   5 -26    2.53    0.16
   3   2 -26    7.90    0.26
   3   2 -26    8.25    0.26
  -5   3 -26    8.22    0.28
   2  -5 -26    8.26    0.21
  -5   6 -26    0.26    0.07
   6  -1 -26    0.31    0.07
   6  -1 -26    0.26    0.08
  -5   9 -26    2.85    0.20
   9  -4 -26    2.59    0.17
  -4  10 -26    0.37    0.08
  10  -6 -26    0.31    0.09
  -4  10 -26    0.24    0.09
   7  -6 -26    3.75    0.17
  -1   7 -26    3.60    0.18
  -1   7 -26    3.42    0.21
   2   4 -26    1.41    0.12
   2   4 -26    1.71    0.14
  -6   2 -26    1.90    0.18
   4  -6 -26    1.42    0.09
  -6   5 -26    0.30    0.08
   5   1 -26    0.24    0.07
   5   1 -26    0.37    0.09
  -6   8 -26    0.54    0.11
   8  -2 -26    0.48    0.10
  11  -5 -26    0.45    0.11
  -6  11 -26    0.71    0.14
  -5  12 -26    0.29    0.11
  12  -7 -26    0.24    0.10
   9  -7 -26   -0.08    0.05
  -2   9 -26    0.01    0.07
  -2   9 -26    0.04    0.05
   1   6 -26    3.60    0.18
   1   6 -26    3.42    0.21
   4   3 -26    0.54    0.09
   4   3 -26    0.48    0.10
  -7   4 -26    0.61    0.10
   7   0 -26    4.35    0.19
  -7   7 -26    4.06    0.22
  10  -3 -26    0.38    0.10
  -7  10 -26    0.92    0.14
  -7  13 -26   -0.02    0.10
  13  -6 -26   -0.10    0.08
  14  -8 -26    0.09    0.10
  -6  14 -26    0.08    0.11
  11  -8 -26    0.25    0.10
  -3  11 -26    0.20    0.10
   0   8 -26    0.20    0.07
   0   8 -26    0.26    0.09
   3   5 -26    0.71    0.11
  -8   3 -26    0.54    0.11
   3   5 -26    0.72    0.12
   6   2 -26    0.48    0.10
   6   2 -26    0.44    0.09
  -8   6 -26    0.47    0.10
  -8   9 -26    0.09    0.07
   9  -1 -26   -0.09    0.06
  -8  12 -26    0.40    0.12
  12  -4 -26    0.41    0.12
   4   8  26    0.49    0.12
  15  -7 -26   -0.05    0.10
  -8  15 -26    0.07    0.12
   7   8  26   -0.12    0.11
  -4  13 -26    0.09    0.11
  -1  10 -26    0.07    0.09
  -1  10 -26    0.28    0.09
   2   7 -26   -0.06    0.06
   2   7 -26   -0.08    0.06
  -9   5 -26    2.23    0.18
   5   4 -26    2.86    0.19
   5   4 -26    2.74    0.18
  -9   8 -26    0.02    0.07
   8   1 -26   -0.11    0.05
   8   1 -26   -0.12    0.05
  11  -2 -26    0.51    0.12
  -9  11 -26    0.51    0.13
   2   9  26    0.43    0.11
  14  -5 -26    0.01    0.10
  -9  14 -26   -0.07    0.10
   5   9  26   -0.16    0.09
  -5  15 -26    0.04    0.12
  -2  12 -26    0.71    0.16
   1   9 -26    0.07    0.09
   1   9 -26    0.06    0.07
   4   6 -26    0.45    0.11
   4   6 -26    0.31    0.10
   7   3 -26    0.55    0.11
   7   3 -26    0.53    0.12
 -10   7 -26    0.67    0.13
 -10  10 -26    0.45    0.12
  10   0 -26    0.34    0.11
  13  -3 -26   -0.02    0.10
 -10  13 -26    0.11    0.11
   3  10  26    0.11    0.11
  -3  14 -26    0.02    0.11
   0  11 -26    2.07    0.24
   3   8 -26    0.45    0.11
   3   8 -26    0.25    0.12
   6   5 -26    0.58    0.13
   6   5 -26    0.55    0.12
 -11   9 -26    0.51    0.12
   9   2 -26    0.41    0.12
   9   2 -26    0.35    0.12
  12  -1 -26    0.10    0.11
 -11  12 -26    0.20    0.11
  -1  13 -26    0.32    0.14
   2  10 -26    0.61    0.16
   5   7 -26    0.12    0.10
   5   7 -26    0.30    0.13
   8   4 -26    0.51    0.14
   8   4 -26    0.47    0.13
 -12   8 -26    0.62    0.13
 -12  11 -26    0.21    0.11
  11   1 -26    0.17    0.12
  14  -2 -26   -0.05    0.10
   1  12 -26    0.27    0.15
   4   9 -26   -0.01    0.11
   7   6 -26    0.02    0.10
   7   6 -26    0.07    0.10
  10   3 -26   -0.02    0.11
  10   3 -26   -0.02    0.11
 -13  10 -26    0.13    0.11
  13   0 -26   -0.12    0.10
   3  11 -26   -0.02    0.11
   6   8 -26   -0.09    0.10
   6   8 -26    0.01    0.10
   9   5 -26   -0.04    0.11
   9   5 -26   -0.03    0.11
  12   2 -26   -0.09    0.11
   5  10 -26   -0.08    0.13
   8   7 -26    0.21    0.13
   8   7 -26   -0.06    0.12
   0   0 -27    0.04    0.04
   0   0 -27   -0.01    0.03
   2  -1 -27    2.32    0.12
  -1  -1 -27    2.48    0.12
  -1   2 -27    2.39    0.13
  -1   2 -27    2.18    0.13
   2  -1 -27    2.46    0.13
  -1  -1 -27    2.40    0.13
   1  -2 -27    2.43    0.12
   1   1 -27    2.47    0.13
  -2   1 -27    2.51    0.13
   1  -2 -27    2.44    0.12
  -2   1 -27    2.53    0.14
   1   1 -27    2.36    0.13
  -2   4 -27    1.41    0.12
   4  -2 -27    1.45    0.11
   4  -2 -27    1.33    0.09
  -2   4 -27    1.44    0.11
   3  -3 -27   -0.01    0.03
   0   3 -27   -0.02    0.04
   0   3 -27   -0.04    0.04
  -3   0 -27   -0.03    0.04
   3  -3 -27   -0.03    0.03
   3   0 -27   -0.04    0.04
  -3   3 -27    0.04    0.04
  -3   3 -27    0.00    0.05
   0  -3 -27   -0.01    0.03
   3   0 -27   -0.05    0.03
  -3   6 -27    4.01    0.18
  -3   6 -27    4.12    0.21
   6  -3 -27    4.09    0.18
  -1   5 -27    3.41    0.18
  -1   5 -27    3.48    0.17
   5  -4 -27    3.41    0.15
   2   2 -27    1.42    0.11
  -4   2 -27    1.72    0.13
   2   2 -27    1.46    0.11
   2  -4 -27    1.37    0.09
   5  -1 -27    4.50    0.17
   5  -1 -27    4.74    0.20
  -4   5 -27    4.84    0.22
  -4   8 -27    0.15    0.06
   8  -4 -27    0.00    0.05
  -4   8 -27   -0.04    0.06
  -2   7 -27    0.24    0.07
   7  -5 -27    0.28    0.07
  -2   7 -27    0.29    0.09
  -5   1 -27    3.52    0.19
   4  -5 -27    3.34    0.14
   1   4 -27    3.75    0.18
   1   4 -27    3.65    0.18
   4   1 -27    4.71    0.19
  -5   4 -27    4.98    0.23
   4   1 -27    4.82    0.20
   7  -2 -27    0.25    0.07
  -5   7 -27    0.30    0.09
  -5  10 -27    2.41    0.20
  10  -5 -27    2.52    0.18
   9  -6 -27    1.98    0.15
  -3   9 -27    2.21    0.21
  -3   9 -27    2.21    0.16
   0   6 -27   -0.05    0.06
   6  -6 -27   -0.01    0.04
   0   6 -27   -0.08    0.04
   3   3 -27    4.16    0.19
  -6   3 -27    4.02    0.21
   3   3 -27    4.34    0.20
  -6   6 -27   -0.01    0.05
   6   0 -27   -0.06    0.04
   6   0 -27   -0.06    0.05
   9  -3 -27    0.33    0.09
  -6   9 -27    0.39    0.11
  12  -6 -27    0.00    0.08
  -6  12 -27   -0.09    0.08
  11  -7 -27    0.24    0.09
  -4  11 -27    0.22    0.10
   8  -7 -27    0.03    0.06
  -1   8 -27    0.19    0.07
  -1   8 -27    0.10    0.08
   2   5 -27    0.29    0.07
  -7   2 -27    0.14    0.08
   2   5 -27    0.20    0.08
   5   2 -27    0.41    0.09
   5   2 -27    0.22    0.08
  -7   5 -27    0.37    0.10
   8  -1 -27    0.10    0.06
  -7   8 -27    0.02    0.07
   8  -1 -27    0.05    0.06
  -7  11 -27    0.13    0.10
  11  -4 -27    0.18    0.10
  -7  14 -27   -0.08    0.10
  14  -7 -27    0.12    0.11
  13  -8 -27    0.54    0.13
  -5  13 -27    0.53    0.14
  -2  10 -27    0.55    0.13
  -2  10 -27    0.43    0.09
   1   7 -27    0.05    0.06
   1   7 -27   -0.01    0.08
   4   4 -27    0.14    0.08
  -8   4 -27    0.13    0.08
   4   4 -27    0.07    0.07
  -8   7 -27    0.11    0.08
   7   1 -27    0.03    0.06
   7   1 -27   -0.03    0.06
  -8  10 -27    0.06    0.08
  10  -2 -27    0.03    0.07
  -8  13 -27    0.06    0.10
  13  -5 -27    0.03    0.10
   5   8  27   -0.08    0.09
  -6  15 -27   -0.03    0.12
  -3  12 -27    0.15    0.11
   0   9 -27   -0.05    0.07
   0   9 -27   -0.02    0.06
   3   6 -27    2.14    0.17
   3   6 -27    2.04    0.17
   6   3 -27    0.30    0.09
  -9   6 -27    0.34    0.11
   6   3 -27    0.32    0.10
   9   0 -27    0.04    0.07
   9   0 -27   -0.03    0.07
  -9   9 -27   -0.09    0.07
  12  -3 -27    0.28    0.11
  -9  12 -27    0.42    0.12
   3   9  27    0.33    0.12
  15  -6 -27    0.05    0.11
   6   9  27   -0.14    0.11
  -4  14 -27    0.26    0.13
  -1  11 -27   -0.01    0.09
   2   8 -27    0.49    0.10
   2   8 -27    0.31    0.11
   5   5 -27    2.58    0.20
   5   5 -27    2.22    0.18
   8   2 -27    0.04    0.07
   8   2 -27    0.10    0.09
 -10   8 -27    0.16    0.09
 -10  11 -27    0.18    0.11
  11  -1 -27    0.05    0.10
  14  -4 -27    0.13    0.13
   4  10  27    0.08    0.11
  -2  13 -27   -0.08    0.11
   1  10 -27   -0.02    0.10
   4   7 -27    0.18    0.11
   4   7 -27    0.18    0.09
   7   4 -27    0.22    0.10
 -11   7 -27    0.28    0.11
   7   4 -27    0.14    0.10
 -11  10 -27    0.16    0.11
  10   1 -27    0.27    0.11
  10   1 -27    0.22    0.11
 -11  13 -27    0.13    0.13
  13  -2 -27   -0.01    0.11
   0  12 -27    0.01    0.11
   3   9 -27    0.27    0.11
   3   9 -27    0.04    0.11
   6   6 -27   -0.08    0.08
   6   6 -27    0.00    0.09
   9   3 -27    0.28    0.13
   9   3 -27    0.19    0.11
 -12   9 -27    0.34    0.12
 -12  12 -27   -0.03    0.10
  12   0 -27    0.07    0.12
   2  11 -27    0.12    0.13
   5   8 -27    0.37    0.13
   5   8 -27    0.44    0.12
   8   5 -27   -0.16    0.09
   8   5 -27    0.26    0.12
 -13  11 -27    0.06    0.12
  11   2 -27    0.06    0.13
  11   2 -27    0.12    0.12
   4  10 -27    0.33    0.15
   7   7 -27    0.13    0.11
   7   7 -27   -0.15    0.09
  10   4 -27    0.30    0.14
  10   4 -27   -0.11    0.11
   6   9 -27   -0.08    0.12
   9   6 -27   -0.11    0.12
   9   6 -27    0.07    0.14
  -1   0 -28   16.21    0.36
  -1   0 -28   16.28    0.38
   1  -1 -28   15.41    0.34
   0   1 -28   15.86    0.36
   1  -1 -28   16.35    0.36
   0   1 -28   16.40    0.37
   3  -2 -28    2.62    0.12
  -1   3 -28    3.39    0.15
  -1   3 -28    2.90    0.16
   3  -2 -28    2.80    0.14
   2   0 -28    0.04    0.04
  -2   2 -28   -0.02    0.03
   0  -2 -28   -0.02    0.03
  -2   2 -28   -0.05    0.03
   2   0 -28   -0.04    0.03
   0  -2 -28    0.00    0.03
  -2   5 -28    7.72    0.28
   5  -3 -28    7.78    0.24
  -2   5 -28    7.78    0.25
   2  -3 -28    2.87    0.13
  -3   1 -28    3.16    0.16
   1   2 -28    3.15    0.15
   2  -3 -28    2.97    0.12
   1   2 -28    2.87    0.15
  -3   4 -28    4.16    0.20
   4  -1 -28    4.15    0.16
  -3   4 -28    3.86    0.17
   4  -1 -28    4.49    0.18
  -3   7 -28    0.77    0.11
  -3   7 -28    0.57    0.10
   7  -4 -28    0.87    0.11
   0   4 -28    5.20    0.22
   0   4 -28    4.97    0.20
  -4   0 -28    4.49    0.21
   4  -4 -28    4.73    0.17
   1  -4 -28    4.21    0.15
   3   1 -28    4.16    0.17
  -4   3 -28    4.08    0.20
   3   1 -28    4.16    0.18
  -4   6 -28    0.58    0.09
   6  -2 -28    0.62    0.08
   6  -2 -28    0.87    0.11
  -4   6 -28    0.81    0.11
  -4   9 -28    0.84    0.14
  -4   9 -28    0.62    0.10
   9  -5 -28    0.80    0.12
   6  -5 -28    0.03    0.05
  -1   6 -28    0.05    0.05
  -1   6 -28   -0.05    0.06
  -5   2 -28    7.45    0.28
   2   3 -28    7.83    0.26
   3  -5 -28    8.20    0.22
   2   3 -28    8.02    0.26
  -5   5 -28    0.20    0.07
   5   0 -28    0.07    0.05
   5   0 -28    0.10    0.06
   8  -3 -28    0.40    0.09
  -5   8 -28    0.47    0.10
  11  -6 -28    0.13    0.09
  -5  11 -28    0.09    0.09
   8  -6 -28    0.71    0.10
  -2   8 -28    0.51    0.11
  -2   8 -28    0.65    0.10
   1   5 -28    0.01    0.07
   5  -6 -28    0.14    0.05
   1   5 -28    0.07    0.06
  -6   4 -28    0.67    0.11
   4   2 -28    0.70    0.10
   4   2 -28    0.66    0.10
  -6   7 -28    3.18    0.19
   7  -1 -28    3.23    0.16
   7  -1 -28    2.99    0.18
  -6  10 -28    0.36    0.11
  10  -4 -28    0.25    0.09
  13  -7 -28    0.07    0.09
  -6  13 -28   -0.02    0.10
  -3  10 -28    0.01    0.06
  -3  10 -28   -0.04    0.08
  10  -7 -28    0.07    0.07
   0   7 -28    3.21    0.21
   0   7 -28    3.46    0.19
   3   4 -28    0.80    0.12
   3   4 -28    0.80    0.11
  -7   3 -28    0.85    0.14
  -7   6 -28    3.54    0.21
   6   1 -28    3.31    0.19
   6   1 -28    3.31    0.18
  -7   9 -28    0.02    0.08
   9  -2 -28    0.00    0.07
  -7  12 -28    0.19    0.10
  12  -5 -28    0.13    0.10
  15  -8 -28    0.11    0.11
  -7  15 -28    0.24    0.14
   8   7  28    0.20    0.12
  -4  12 -28    0.08    0.09
  12  -8 -28   -0.05    0.08
  -1   9 -28    0.39    0.09
  -1   9 -28    0.48    0.12
   2   6 -28    0.57    0.12
   2   6 -28    0.73    0.12
   5   3 -28    0.52    0.10
  -8   5 -28    0.55    0.11
   5   3 -28    0.55    0.10
   8   0 -28    0.42    0.09
  -8   8 -28    0.71    0.13
   8   0 -28    0.44    0.09
  -8  11 -28    0.72    0.15
  11  -3 -28    0.40    0.10
  14  -6 -28   -0.06    0.10
  -8  14 -28    0.05    0.11
   6   8  28    0.09    0.11
  -5  14 -28    0.18    0.13
  -2  11 -28    0.00    0.09
   1   8 -28    0.48    0.11
   1   8 -28    0.30    0.10
   4   5 -28    0.58    0.12
  -9   4 -28    0.64    0.14
   4   5 -28    0.70    0.12
   7   2 -28    0.07    0.07
   7   2 -28   -0.01    0.06
  -9   7 -28    0.00    0.06
  10  -1 -28   -0.05    0.07
  -9  10 -28   -0.08    0.07
  -9  13 -28    0.06    0.11
  13  -4 -28    0.02    0.10
   4   9  28    0.04    0.10
  -3  13 -28    0.16    0.11
   0  10 -28    0.26    0.10
   0  10 -28    0.21    0.11
   3   7 -28   -0.05    0.07
   3   7 -28    0.02    0.07
   6   4 -28    0.47    0.12
 -10   6 -28    0.33    0.12
   6   4 -28    0.46    0.11
   9   1 -28   -0.01    0.08
 -10   9 -28    0.05    0.09
   9   1 -28    0.04    0.08
 -10  12 -28    0.12    0.10
  12  -2 -28    0.07    0.10
  15  -5 -28   -0.01    0.12
   5  10  28    0.09    0.13
  -1  12 -28    0.42    0.14
   2   9 -28    0.24    0.10
   2   9 -28   -0.07    0.09
   5   6 -28    0.09    0.10
   5   6 -28    0.07    0.09
 -11   8 -28    0.93    0.17
   8   3 -28    0.68    0.14
   8   3 -28    0.68    0.14
  11   0 -28    0.21    0.12
 -11  11 -28    0.16    0.11
  14  -3 -28    0.20    0.13
  -2  14 -28    0.03    0.13
   1  11 -28    0.45    0.15
   4   8 -28    0.00    0.10
   4   8 -28    0.00    0.08
   7   5 -28    0.16    0.11
   7   5 -28    0.15    0.11
  10   2 -28    0.01    0.09
  10   2 -28    0.13    0.10
 -12  10 -28    0.00    0.10
  13  -1 -28   -0.18    0.10
   0  13 -28   -0.06    0.11
   3  10 -28   -0.19    0.10
   6   7 -28    0.10    0.11
   6   7 -28   -0.01    0.11
   9   4 -28    0.06    0.12
   9   4 -28   -0.01    0.12
 -13   9 -28    0.01    0.11
  12   1 -28   -0.02    0.11
   2  12 -28   -0.07    0.13
   5   9 -28    0.29    0.16
   8   6 -28    0.11    0.11
   8   6 -28    0.01    0.12
  11   3 -28   -0.01    0.13
  11   3 -28    0.04    0.12
   7   8 -28    0.27    0.15
   7   8 -28    0.24    0.15
  10   5 -28   -0.05    0.13
  10   5 -28    0.09    0.14
   1   0 -29   -0.02    0.03
   0  -1 -29   -0.01    0.04
   1   0 -29    0.02    0.04
   0  -1 -29   -0.01    0.04
  -1   1 -29    0.02    0.04
  -1   1 -29    0.02    0.03
  -2   0 -29   -0.03    0.04
   2  -2 -29    0.01    0.03
   2  -2 -29    0.01    0.04
  -2   0 -29    0.01    0.04
   0   2 -29    0.01    0.04
   0   2 -29   -0.02    0.03
  -2   3 -29    1.65    0.12
   3  -1 -29    1.42    0.10
  -1  -2 -29    1.36    0.12
  -1  -2 -29    1.35    0.10
  -2   3 -29    1.41    0.11
   3  -1 -29    1.74    0.11
  -3  -1 -29    1.68    0.16
   4  -3 -29    1.61    0.11
   4  -3 -29    1.39    0.09
  -1   4 -29    1.77    0.14
  -1   4 -29    1.85    0.13
  -3   2 -29    1.59    0.15
   1  -3 -29    1.52    0.11
   2   1 -29    1.56    0.11
   1  -3 -29    1.62    0.10
   2   1 -29    1.53    0.12
  -3   5 -29    5.90    0.23
  -3   5 -29    5.79    0.25
   5  -2 -29    6.12    0.19
   5  -2 -29    6.11    0.22
  -2   6 -29    0.67    0.11
  -2   6 -29    0.69    0.10
   6  -4 -29    0.70    0.09
  -4   1 -29    1.57    0.13
   3  -4 -29    1.71    0.11
   1   3 -29    1.72    0.13
   3  -4 -29    1.56    0.09
   1   3 -29    1.59    0.12
   4   0 -29    0.05    0.05
  -4   4 -29    0.10    0.06
   4   0 -29    0.01    0.04
  -4   7 -29    0.76    0.13
  -4   7 -29    0.68    0.11
   7  -3 -29    0.69    0.10
  -3   8 -29    0.50    0.11
   8  -5 -29    0.55    0.10
  -3   8 -29    0.55    0.10
   0   5 -29    0.01    0.05
   0   5 -29    0.03    0.06
   5  -5 -29    0.02    0.04
   3   2 -29    5.81    0.22
  -5   3 -29    5.87    0.25
   3   2 -29    5.76    0.23
   2  -5 -29    5.55    0.18
   6  -1 -29    0.60    0.10
  -5   6 -29    0.81    0.12
   6  -1 -29    0.81    0.10
   9  -4 -29    1.09    0.14
  -5   9 -29    1.09    0.16
  10  -6 -29    1.53    0.16
  -4  10 -29    1.60    0.18
  -4  10 -29    1.67    0.16
  -1   7 -29    0.12    0.06
   7  -6 -29    0.12    0.06
  -1   7 -29    0.05    0.07
   2   4 -29    0.68    0.10
   4  -6 -29    0.74    0.08
  -6   2 -29    0.61    0.12
   2   4 -29    0.72    0.11
   5   1 -29    0.61    0.10
   5   1 -29    0.83    0.11
  -6   5 -29    0.85    0.13
   8  -2 -29    0.02    0.07
  -6   8 -29    0.18    0.09
  11  -5 -29    0.58    0.12
  -6  11 -29    0.53    0.13
  -5  12 -29    0.14    0.11
  12  -7 -29    0.07    0.09
  -2   9 -29    1.11    0.13
   9  -7 -29    1.24    0.13
  -2   9 -29    1.02    0.15
   1   6 -29    0.12    0.07
   1   6 -29    0.18    0.08
  -7   4 -29    0.79    0.13
   4   3 -29    0.57    0.10
   4   3 -29    0.72    0.11
   7   0 -29    0.01    0.06
   7   0 -29   -0.03    0.05
  -7   7 -29   -0.01    0.07
  -7  10 -29    0.54    0.12
  10  -3 -29    0.82    0.14
  -7  13 -29    0.09    0.11
  13  -6 -29   -0.05    0.09
  -6  14 -29    0.41    0.15
  14  -8 -29    0.09    0.11
  -3  11 -29   -0.01    0.09
   0   8 -29    0.11    0.08
   0   8 -29   -0.05    0.07
   3   5 -29    0.51    0.11
   3   5 -29    0.50    0.11
  -8   3 -29    0.51    0.12
   6   2 -29    0.21    0.09
   6   2 -29    0.08    0.08
  -8   6 -29    0.05    0.08
  -8   9 -29    0.08    0.09
   9  -1 -29    0.02    0.07
  -8  12 -29    0.33    0.13
  12  -4 -29    0.19    0.09
  15  -7 -29    0.05    0.12
  -8  15 -29    0.06    0.12
   7   8  29   -0.07    0.12
  -4  13 -29    0.60    0.15
  -1  10 -29   -0.04    0.09
  -1  10 -29    0.00    0.07
   2   7 -29    1.07    0.14
   2   7 -29    0.87    0.15
   5   4 -29    1.20    0.15
  -9   5 -29    1.30    0.18
   5   4 -29    1.00    0.14
  -9   8 -29    0.02    0.09
   8   1 -29   -0.05    0.07
   8   1 -29   -0.04    0.07
  -9  11 -29    0.27    0.11
  11  -2 -29    0.32    0.12
   2   9  29    0.11    0.09
  14  -5 -29    0.24    0.13
  -9  14 -29    0.16    0.12
   5   9  29   -0.01    0.12
  -2  12 -29    0.17    0.11
   1   9 -29    0.06    0.09
   1   9 -29    0.03    0.08
   4   6 -29    1.99    0.19
   4   6 -29    1.50    0.18
   7   3 -29    0.93    0.15
 -10   7 -29    0.55    0.13
   7   3 -29    0.78    0.14
  10   0 -29   -0.06    0.08
 -10  10 -29    0.00    0.09
  13  -3 -29    0.24    0.12
 -10  13 -29    0.07    0.11
  -3  14 -29   -0.02    0.12
   0  11 -29    0.13    0.11
   3   8 -29    0.14    0.11
   3   8 -29    0.05    0.08
   6   5 -29    0.57    0.13
   6   5 -29    0.49    0.13
   9   2 -29    0.40    0.12
 -11   9 -29    0.28    0.11
   9   2 -29    0.18    0.12
 -11  12 -29    0.35    0.13
  12  -1 -29    0.03    0.09
  -1  13 -29    0.00    0.11
   2  10 -29    0.09    0.12
   5   7 -29    0.06    0.10
   5   7 -29    0.17    0.12
 -12   8 -29    0.04    0.10
   8   4 -29    0.23    0.12
   8   4 -29    0.17    0.11
 -12  11 -29    0.20    0.12
  11   1 -29    0.29    0.13
  14  -2 -29   -0.08    0.11
   1  12 -29    0.04    0.13
   4   9 -29    0.73    0.18
   4   9 -29    0.92    0.17
   7   6 -29    0.07    0.11
   7   6 -29    0.09    0.11
  10   3 -29    0.04    0.12
 -13  10 -29   -0.03    0.11
  10   3 -29    0.20    0.13
  13   0 -29   -0.05    0.12
   3  11 -29    0.15    0.14
   6   8 -29    0.29    0.15
   6   8 -29    0.49    0.14
   9   5 -29   -0.04    0.12
   9   5 -29    0.00    0.12
  12   2 -29    0.08    0.12
   8   7 -29   -0.04    0.12
   8   7 -29   -0.06    0.13
   0   0 -30   71.07    1.07
   0   0 -30   66.76    1.07
   2  -1 -30    0.84    0.10
   2  -1 -30    0.77    0.09
  -1   2 -30    0.60    0.08
  -1   2 -30    0.81    0.11
  -1  -1 -30    0.65    0.09
  -1  -1 -30    0.86    0.10
   1  -2 -30    0.95    0.10
   1   1 -30    0.88    0.10
   1  -2 -30    0.90    0.09
  -2   1 -30    0.54    0.08
  -2   1 -30    0.69    0.10
   1   1 -30    0.82    0.10
   4  -2 -30    6.28    0.19
   4  -2 -30    5.99    0.22
  -2   4 -30    6.24    0.25
  -2   4 -30    6.47    0.24
   3  -3 -30    1.71    0.10
   3  -3 -30    1.52    0.11
   0   3 -30    1.55    0.12
  -3   0 -30    0.93    0.12
   0   3 -30    1.52    0.13
   3   0 -30    0.70    0.09
  -3   3 -30    0.82    0.11
   3   0 -30    0.73    0.09
   0  -3 -30    0.73    0.09
   0  -3 -30    0.64    0.08
  -3   6 -30    4.21    0.22
   6  -3 -30    4.33    0.20
  -3   6 -30    4.33    0.20
   5  -4 -30    2.18    0.14
  -1   5 -30    2.24    0.16
  -1   5 -30    2.15    0.15
  -4   2 -30    6.14    0.25
   2  -4 -30    6.19    0.20
   2   2 -30    6.21    0.23
   2   2 -30    5.98    0.23
   2  -4 -30    6.05    0.19
  -4   5 -30    0.45    0.10
   5  -1 -30    0.59    0.08
   5  -1 -30    0.63    0.10
  -4   8 -30    1.09    0.14
   8  -4 -30    1.02    0.12
  -4   8 -30    1.01    0.13
  -2   7 -30    0.08    0.07
  -2   7 -30    0.06    0.07
   7  -5 -30    0.10    0.06
   1   4 -30    2.14    0.15
  -5   1 -30    2.09    0.19
   4  -5 -30    2.15    0.13
   1   4 -30    2.18    0.16
   1  -5 -30    0.41    0.07
   4   1 -30    0.54    0.09
  -5   4 -30    0.73    0.12
   4   1 -30    0.44    0.09
  -5   7 -30    0.46    0.11
   7  -2 -30    0.31    0.09
  10  -5 -30    0.22    0.09
  -5  10 -30    0.22    0.10
  -3   9 -30    0.17    0.09
  -3   9 -30    0.12    0.08
   9  -6 -30    0.04    0.06
   6  -6 -30    1.65    0.12
   0   6 -30    1.62    0.15
   0   6 -30    1.67    0.17
  -6   3 -30    4.14    0.22
   3   3 -30    4.18    0.20
   3   3 -30    4.08    0.20
  -6   6 -30    1.65    0.18
   6   0 -30    1.29    0.13
   6   0 -30    1.58    0.16
  -6   9 -30    0.71    0.13
   9  -3 -30    0.73    0.12
  12  -6 -30    0.10    0.10
  -6  12 -30    0.21    0.12
  11  -7 -30    0.41    0.11
  -4  11 -30    0.50    0.13
  -4  11 -30    0.50    0.11
  -1   8 -30    0.92    0.13
   8  -7 -30    1.02    0.13
  -1   8 -30    0.69    0.13
  -7   2 -30   -0.08    0.08
   2   5 -30    0.23    0.08
   2   5 -30    0.07    0.07
   5   2 -30    0.32    0.08
   5   2 -30    0.37    0.09
  -7   5 -30    0.17    0.10
   8  -1 -30    1.03    0.14
  -7   8 -30    1.18    0.16
  11  -4 -30    0.58    0.13
  -7  11 -30    0.72    0.15
  14  -7 -30    0.06    0.11
  -7  14 -30    0.17    0.13
  -5  13 -30    0.06    0.11
  -2  10 -30    0.06    0.09
  -2  10 -30    0.11    0.08
   1   7 -30    0.89    0.14
   1   7 -30    0.72    0.12
   4   4 -30    1.08    0.14
  -8   4 -30    0.82    0.14
   4   4 -30    1.07    0.14
  -8   7 -30    0.88    0.14
   7   1 -30    0.95    0.13
   7   1 -30    1.23    0.14
  -8  10 -30    0.05    0.09
  10  -2 -30    0.14    0.09
  -8  13 -30    0.14    0.11
  13  -5 -30   -0.14    0.08
  -3  12 -30    0.23    0.12
   0   9 -30    0.11    0.08
   0   9 -30    0.11    0.09
   3   6 -30    0.08    0.09
   3   6 -30    0.19    0.08
  -9   6 -30    0.81    0.15
   6   3 -30    0.88    0.14
   6   3 -30    0.72    0.13
  -9   9 -30   -0.04    0.09
   9   0 -30    0.04    0.08
  12  -3 -30    0.21    0.11
  -9  12 -30    0.16    0.12
   3   9  30    0.25    0.11
  -4  14 -30   -0.11    0.10
  -1  11 -30    0.89    0.17
   2   8 -30    0.05    0.09
   2   8 -30    0.04    0.10
   5   5 -30    0.35    0.12
   5   5 -30    0.34    0.11
 -10   5 -30    0.12    0.11
 -10   8 -30   -0.05    0.09
   8   2 -30    0.08    0.09
   8   2 -30    0.08    0.09
 -10  11 -30    0.23    0.13
  11  -1 -30    0.22    0.11
 -10  14 -30   -0.01    0.12
  14  -4 -30   -0.01    0.11
   4  10  30    0.04    0.12
  -2  13 -30    0.07    0.12
   1  10 -30    0.77    0.14
   1  10 -30    0.73    0.16
   4   7 -30    0.56    0.15
   4   7 -30    0.48    0.12
 -11   7 -30    0.66    0.15
   7   4 -30    0.97    0.16
   7   4 -30    0.73    0.14
  10   1 -30    0.43    0.13
 -11  10 -30    0.18    0.12
 -11  13 -30   -0.06    0.12
  13  -2 -30    0.05    0.12
   0  12 -30    0.62    0.17
   3   9 -30    0.05    0.11
   3   9 -30    0.14    0.11
   6   6 -30    0.12    0.12
   6   6 -30    0.18    0.11
   9   3 -30    0.24    0.11
 -12   9 -30    0.17    0.12
   9   3 -30    0.46    0.13
 -12  12 -30    0.07    0.12
  12   0 -30    0.08    0.11
   2  11 -30    0.16    0.14
   5   8 -30    0.17    0.13
   5   8 -30    0.02    0.11
   8   5 -30   -0.02    0.11
   8   5 -30    0.12    0.11
  11   2 -30    0.05    0.13
 -13  11 -30    0.06    0.12
   4  10 -30    0.13    0.13
   7   7 -30    0.13    0.13
   7   7 -30    0.12    0.13
  10   4 -30    0.04    0.13
  10   4 -30    0.03    0.12
   0   1 -31    0.09    0.06
  -1   0 -31   -0.04    0.06
   0   1 -31    0.09    0.06
  -1   0 -31    0.04    0.06
   1  -1 -31    0.04    0.05
   1  -1 -31    0.00    0.05
   3  -2 -31    1.14    0.12
  -1   3 -31    1.08    0.13
  -2  -1 -31    1.14    0.14
   3  -2 -31    1.21    0.10
  -1   3 -31    0.95    0.11
   2   0 -31    0.06    0.05
   0  -2 -31   -0.06    0.05
  -2   2 -31    0.11    0.06
   0  -2 -31    0.03    0.05
  -2   2 -31    0.01    0.06
   2   0 -31    0.07    0.05
   5  -3 -31    4.71    0.20
  -2   5 -31    4.50    0.21
  -2   5 -31    4.48    0.23
   2  -3 -31    1.08    0.11
   1   2 -31    1.10    0.12
   2  -3 -31    1.09    0.10
   1   2 -31    1.11    0.12
  -3   1 -31    0.92    0.13
   4  -1 -31    2.63    0.14
  -3   4 -31    2.69    0.18
  -3   4 -31    2.77    0.17
   4  -1 -31    3.02    0.17
  -3   7 -31    0.02    0.07
   7  -4 -31    0.00    0.06
  -3   7 -31    0.07    0.08
   0   4 -31    0.18    0.08
  -4   0 -31   -0.12    0.07
   0   4 -31    0.13    0.07
   4  -4 -31    0.09    0.06
  -4   3 -31    2.75    0.19
   3   1 -31    2.97    0.17
   1  -4 -31    2.65    0.14
   3   1 -31    2.63    0.15
   6  -2 -31    2.01    0.15
  -4   6 -31    2.02    0.19
  -4   6 -31    1.90    0.16
  -4   9 -31    1.48    0.16
  -4   9 -31    1.40    0.18
   9  -5 -31    1.43    0.15
  -1   6 -31    0.24    0.09
  -1   6 -31    0.36    0.10
   6  -5 -31    0.38    0.08
   3  -5 -31    4.56    0.17
   2   3 -31    4.74    0.21
  -5   2 -31    4.07    0.22
   2   3 -31    4.58    0.22
   5   0 -31    0.13    0.06
  -5   5 -31    0.05    0.07
   5   0 -31    0.03    0.06
  -5   8 -31    0.16    0.09
   8  -3 -31    0.04    0.06
  11  -6 -31    0.71    0.13
  -5  11 -31    0.41    0.13
   8  -6 -31    0.12    0.07
  -2   8 -31    0.21    0.08
  -2   8 -31    0.07    0.08
   5  -6 -31    0.29    0.07
   1   5 -31    0.16    0.08
   1   5 -31    0.23    0.08
  -6   1 -31    0.21    0.11
  -6   4 -31    1.92    0.19
   4   2 -31    2.23    0.16
   4   2 -31    1.86    0.15
   7  -1 -31    0.61    0.11
  -6   7 -31    0.62    0.13
  10  -4 -31    1.88    0.19
  -6  10 -31    2.07    0.22
  13  -7 -31    0.08    0.10
  -6  13 -31    0.32    0.13
  10  -7 -31    1.53    0.16
  -3  10 -31    1.49    0.16
  -3  10 -31    1.27    0.17
   0   7 -31    0.06    0.08
   0   7 -31    0.16    0.08
  -7   3 -31    0.00    0.08
   3   4 -31    0.21    0.09
   3   4 -31    0.12    0.07
  -7   6 -31    0.32    0.12
   6   1 -31    0.51    0.10
   6   1 -31    0.40    0.10
   9  -2 -31    0.14    0.08
  -7   9 -31    0.11    0.10
  12  -5 -31    0.19    0.10
  -7  12 -31    0.22    0.12
  -4  12 -31    0.40    0.13
  -1   9 -31    0.75    0.13
  -1   9 -31    0.68    0.14
   2   6 -31    0.10    0.09
   2   6 -31    0.06    0.08
   5   3 -31    0.19    0.08
   5   3 -31    0.13    0.08
  -8   5 -31    0.04    0.08
  -8   8 -31   -0.04    0.09
   8   0 -31    0.00    0.07
  -8  11 -31    0.05    0.10
  11  -3 -31    0.13    0.10
  -8  14 -31    0.10    0.13
  14  -6 -31    0.11    0.12
   6   8  31    0.17    0.13
  -5  14 -31    0.52    0.17
  -2  11 -31   -0.01    0.10
   1   8 -31    0.55    0.13
   1   8 -31    0.82    0.13
   4   5 -31    1.68    0.18
   4   5 -31    1.24    0.15
  -9   4 -31    1.57    0.20
   7   2 -31    0.12    0.09
  -9   7 -31    0.00    0.09
   7   2 -31    0.10    0.09
  -9  10 -31    0.06    0.10
  10  -1 -31    0.04    0.09
  13  -4 -31    0.25    0.13
  -9  13 -31    0.12    0.12
   4   9  31    0.33    0.13
  -3  13 -31    0.38    0.14
   0  10 -31    0.06    0.09
   0  10 -31    0.07    0.10
   3   7 -31    1.74    0.18
   3   7 -31    1.46    0.19
   6   4 -31    1.76    0.19
   6   4 -31    1.73    0.19
 -10   6 -31    1.35    0.18
   9   1 -31    0.12    0.10
   9   1 -31    0.01    0.09
 -10   9 -31    0.07    0.10
  12  -2 -31    0.35    0.13
 -10  12 -31    0.23    0.12
  -1  12 -31    0.07    0.12
   2   9 -31    0.25    0.13
   2   9 -31    0.02    0.09
   5   6 -31    0.54    0.14
   5   6 -31    0.44    0.12
   8   3 -31    0.08    0.09
   8   3 -31    0.00    0.09
 -11   8 -31   -0.11    0.09
  11   0 -31   -0.14    0.08
 -11  11 -31   -0.01    0.10
  14  -3 -31    0.09    0.12
   1  11 -31    0.11    0.12
   4   8 -31    0.39    0.13
   4   8 -31    0.46    0.15
   7   5 -31    0.02    0.10
   7   5 -31    0.00    0.10
 -12  10 -31    0.16    0.14
  10   2 -31    0.25    0.13
 -12  13 -31    0.10    0.13
  13  -1 -31    0.14    0.13
   3  10 -31    0.39    0.15
   6   7 -31    0.12    0.13
   6   7 -31    0.09    0.12
   9   4 -31    0.56    0.16
 -13   9 -31    0.21    0.13
   9   4 -31    0.31    0.14
 -13  12 -31   -0.09    0.12
  12   1 -31    0.04    0.12
   5   9 -31    0.43    0.18
   5   9 -31    0.38    0.15
   8   6 -31    0.08    0.12
   8   6 -31    0.04    0.13
 -14  11 -31   -0.03    0.13
  11   3 -31    0.02    0.14
   1   0 -32   15.75    0.38
   0  -1 -32   15.31    0.37
   0  -1 -32   15.51    0.37
   1   0 -32   15.63    0.37
  -1   1 -32   15.19    0.39
  -1   1 -32   14.82    0.37
   0   2 -32    0.33    0.09
   2  -2 -32    0.22    0.07
  -2   0 -32    0.11    0.09
  -2   0 -32    0.28    0.10
   2  -2 -32    0.28    0.08
   0   2 -32    0.26    0.08
   3  -1 -32    2.60    0.15
  -1  -2 -32    2.56    0.17
   3  -1 -32    2.63    0.16
  -2   3 -32    2.55    0.18
  -1  -2 -32    2.36    0.15
  -2   3 -32    2.55    0.16
   4  -3 -32    5.94    0.22
  -1   4 -32    5.48    0.24
  -3  -1 -32    5.99    0.26
   1  -3 -32    2.35    0.15
  -3   2 -32    2.65    0.19
   2   1 -32    2.84    0.17
   2   1 -32    2.75    0.17
  -3   2 -32    2.30    0.17
   1  -3 -32    2.90    0.15
   5  -2 -32    2.31    0.16
  -3   5 -32    2.49    0.18
   5  -2 -32    2.59    0.14
  -3   5 -32    2.61    0.17
  -2   6 -32    2.05    0.18
   6  -4 -32    2.30    0.16
  -2   6 -32    1.74    0.18
   1   3 -32    5.67    0.24
   3  -4 -32    5.83    0.21
   1   3 -32    5.58    0.23
  -4   1 -32    5.54    0.26
  -4   4 -32    0.19    0.10
   4   0 -32    0.33    0.09
   4   0 -32    0.24    0.07
   7  -3 -32    0.89    0.12
  -4   7 -32    0.63    0.12
  -4   7 -32    0.78    0.14
  -3   8 -32    0.14    0.10
   8  -5 -32    0.13    0.08
  -3   8 -32    0.02    0.09
   5  -5 -32    1.42    0.13
   0   5 -32    1.42    0.16
   0   5 -32    1.17    0.14
   2  -5 -32    2.47    0.14
  -5   3 -32    2.63    0.20
   3   2 -32    2.43    0.17
   3   2 -32    2.69    0.18
   6  -1 -32    0.33    0.10
   6  -1 -32    0.38    0.08
  -5   6 -32    0.28    0.11
   9  -4 -32    0.79    0.12
  -5   9 -32    0.65    0.14
  -4  10 -32    0.20    0.10
  -4  10 -32    0.30    0.11
  10  -6 -32    0.17    0.09
  -1   7 -32    0.90    0.14
  -1   7 -32    0.60    0.11
   7  -6 -32    0.70    0.10
   2   4 -32    2.12    0.16
  -6   2 -32    1.92    0.19
   2   4 -32    2.25    0.18
  -6   5 -32    0.26    0.11
   5   1 -32    0.48    0.11
   5   1 -32    0.42    0.09
   8  -2 -32    0.40    0.10
  -6   8 -32    0.25    0.11
  11  -5 -32    0.33    0.11
  -6  11 -32    0.61    0.15
  12  -7 -32    0.15    0.10
  -5  12 -32    0.31    0.13
   9  -7 -32    0.36    0.09
  -2   9 -32    0.31    0.11
  -2   9 -32    0.18    0.09
   1   6 -32    0.47    0.11
   1   6 -32    0.68    0.13
   4   3 -32    0.88    0.13
   4   3 -32    0.80    0.13
  -7   4 -32    0.72    0.14
   7   0 -32    3.73    0.20
  -7   7 -32    3.44    0.24
   7   0 -32    3.83    0.23
  -7  10 -32    0.20    0.12
  10  -3 -32    0.16    0.10
  -7  13 -32    0.04    0.11
  13  -6 -32    0.09    0.11
  -6  14 -32    0.23    0.14
  -3  11 -32    0.03    0.10
  -3  11 -32    0.21    0.10
   0   8 -32    1.71    0.18
   0   8 -32    1.89    0.18
  -8   3 -32    0.00    0.10
   3   5 -32    0.16    0.10
   3   5 -32    0.21    0.09
  -8   6 -32    0.09    0.10
   6   2 -32    0.37    0.10
   6   2 -32    0.36    0.10
  -8   9 -32    0.18    0.11
   9  -1 -32    0.22    0.10
  -8  12 -32    0.35    0.14
  12  -4 -32    0.35    0.12
  -4  13 -32    0.04    0.11
  -1  10 -32    0.06    0.10
  -1  10 -32    0.06    0.09
   2   7 -32    0.15    0.09
   2   7 -32    0.39    0.11
  -9   5 -32    0.61    0.16
   5   4 -32    0.82    0.14
   5   4 -32    0.94    0.15
  -9   8 -32    0.05    0.10
   8   1 -32    0.23    0.10
   8   1 -32    0.19    0.10
  -9  11 -32    0.25    0.13
  11  -2 -32    0.37    0.11
  14  -5 -32   -0.01    0.11
  -9  14 -32    0.07    0.14
   5   9  32    0.13    0.12
  -2  12 -32    0.24    0.13
   1   9 -32    0.15    0.11
   1   9 -32   -0.08    0.09
   4   6 -32    0.30    0.12
   4   6 -32    0.37    0.12
   7   3 -32    0.06    0.09
 -10   7 -32    0.15    0.12
   7   3 -32    0.28    0.11
  10   0 -32    0.07    0.10
 -10  10 -32    0.10    0.11
  13  -3 -32    0.00    0.11
 -10  13 -32   -0.03    0.11
   0  11 -32    0.91    0.18
   3   8 -32    0.37    0.12
   3   8 -32    0.17    0.12
   6   5 -32    0.71    0.15
 -11   6 -32    0.43    0.15
   6   5 -32    0.51    0.13
   9   2 -32    0.45    0.13
 -11   9 -32    0.27    0.13
   9   2 -32    0.55    0.14
 -11  12 -32    0.25    0.14
  12  -1 -32    0.07    0.12
  -1  13 -32    0.23    0.14
   2  10 -32    0.24    0.13
   5   7 -32    0.10    0.11
   5   7 -32    0.18    0.13
 -12   8 -32    0.22    0.13
   8   4 -32    0.47    0.14
   8   4 -32    0.48    0.14
 -12  11 -32    0.08    0.12
  11   1 -32    0.10    0.13
   1  12 -32    0.25    0.14
   4   9 -32    0.09    0.12
   4   9 -32    0.00    0.13
   7   6 -32    0.15    0.12
   7   6 -32    0.04    0.13
  10   3 -32   -0.01    0.12
  10   3 -32    0.11    0.12
 -13  10 -32    0.03    0.12
   6   8 -32    0.40    0.16
   6   8 -32    0.29    0.15
   9   5 -32    0.01    0.12
   9   5 -32    0.02    0.13
   0   0 -33    0.11    0.08
   0   0 -33   -0.05    0.07
  -1   2 -33    0.11    0.09
   2  -1 -33    0.10    0.07
  -1  -1 -33    0.00    0.07
  -1   2 -33    0.06    0.09
   2  -1 -33    0.24    0.08
  -1  -1 -33    0.00    0.08
  -2   1 -33   -0.05    0.08
  -2   1 -33    0.11    0.09
   1  -2 -33    0.06    0.07
   1   1 -33    0.06    0.07
   1  -2 -33    0.10    0.07
   1   1 -33    0.05    0.07
  -2  -2 -33    6.57    0.27
  -2   4 -33    6.50    0.28
  -2   4 -33    6.21    0.25
   4  -2 -33    7.08    0.23
   4  -2 -33    6.98    0.25
   0   3 -33    0.03    0.08
   0   3 -33    0.03    0.08
   3  -3 -33    0.07    0.07
   3  -3 -33    0.04    0.06
  -3   0 -33    0.11    0.09
   3   0 -33    0.23    0.08
  -3   3 -33    0.11    0.09
  -3   3 -33   -0.03    0.08
   0  -3 -33   -0.05    0.07
   3   0 -33    0.30    0.08
   0  -3 -33    0.00    0.08
  -3   6 -33    0.97    0.14
  -3   6 -33    0.89    0.15
   6  -3 -33    1.21    0.14
   5  -4 -33    0.36    0.09
  -1   5 -33    0.17    0.09
  -1   5 -33    0.15    0.09
   2   2 -33    6.96    0.27
   2  -4 -33    6.43    0.22
  -4   2 -33    6.53    0.28
   2   2 -33    6.58    0.26
   2  -4 -33    6.83    0.23
   5  -1 -33    1.69    0.16
  -4   5 -33    1.48    0.17
   5  -1 -33    1.73    0.14
  -4   8 -33   -0.06    0.08
  -4   8 -33   -0.01    0.09
   8  -4 -33    0.08    0.08
  -2   7 -33    0.06    0.08
   7  -5 -33    0.11    0.07
  -2   7 -33    0.01    0.08
  -5   1 -33    0.20    0.11
   4  -5 -33    0.36    0.08
   1   4 -33    0.22    0.09
   1   4 -33    0.22    0.09
  -5   4 -33    1.28    0.16
   4   1 -33    1.63    0.16
   4   1 -33    1.92    0.16
   1  -5 -33    1.52    0.13
   7  -2 -33    0.98    0.13
  -5   7 -33    0.84    0.15
  -5  10 -33    1.66    0.21
  10  -5 -33    1.42    0.16
  -3   9 -33    1.25    0.15
  -3   9 -33    1.16    0.17
   9  -6 -33    1.59    0.16
   6  -6 -33    0.14    0.07
   0   6 -33    0.06    0.08
   0   6 -33    0.16    0.09
   3   3 -33    0.99    0.13
  -6   3 -33    0.81    0.15
   3   3 -33    1.08    0.14
   6   0 -33    0.13    0.08
  -6   6 -33    0.12    0.10
   6   0 -33    0.11    0.08
   9  -3 -33    0.58    0.12
  -6   9 -33    0.40    0.13
  12  -6 -33    0.24    0.11
  -6  12 -33   -0.17    0.09
  -4  11 -33    0.08    0.11
  -4  11 -33    0.11    0.10
  11  -7 -33    0.21    0.10
  -1   8 -33    0.01    0.09
  -1   8 -33    0.11    0.09
   2   5 -33    0.17    0.09
  -7   2 -33   -0.02    0.08
   2   5 -33    0.19    0.09
  -7   5 -33    0.79    0.15
   5   2 -33    1.35    0.15
   5   2 -33    1.35    0.15
   8  -1 -33    0.32    0.10
  -7   8 -33    0.29    0.12
  11  -4 -33    0.02    0.09
  -7  11 -33    0.17    0.12
  -7  14 -33    0.23    0.14
  14  -7 -33    0.20    0.12
  -5  13 -33    0.53    0.16
  -2  10 -33    0.30    0.13
  -2  10 -33    0.67    0.13
   1   7 -33    0.13    0.09
   1   7 -33    0.28    0.11
   4   4 -33    0.20    0.09
  -8   4 -33   -0.01    0.10
   4   4 -33    0.11    0.10
  -8   7 -33    0.11    0.11
   7   1 -33    0.44    0.11
   7   1 -33    0.46    0.11
  -8  10 -33    0.00    0.10
  10  -2 -33    0.20    0.11
  13  -5 -33    0.08    0.11
  -8  13 -33    0.17    0.14
  -3  12 -33    0.35    0.13
   0   9 -33   -0.03    0.08
   0   9 -33    0.06    0.10
   3   6 -33    1.84    0.19
   3   6 -33    1.30    0.18
   6   3 -33    0.53    0.13
   6   3 -33    0.54    0.12
  -9   6 -33    0.48    0.14
   9   0 -33    0.11    0.10
  -9   9 -33   -0.04    0.10
  -9  12 -33    0.25    0.13
  12  -3 -33    0.17    0.11
  -4  14 -33    0.31    0.16
  -1  11 -33   -0.01    0.11
   2   8 -33    0.49    0.12
   2   8 -33    0.28    0.12
 -10   5 -33    1.11    0.17
   5   5 -33    1.34    0.18
   5   5 -33    1.92    0.21
 -10   8 -33    0.00    0.11
   8   2 -33    0.04    0.09
   8   2 -33    0.00    0.10
 -10  11 -33    0.13    0.13
  11  -1 -33    0.12    0.10
  14  -4 -33    0.18    0.13
 -10  14 -33   -0.14    0.11
  -2  13 -33    0.13    0.13
   1  10 -33   -0.01    0.10
   1  10 -33    0.08    0.11
   4   7 -33    0.22    0.11
   4   7 -33    0.16    0.12
   7   4 -33    0.11    0.11
 -11   7 -33    0.11    0.11
   7   4 -33   -0.03    0.09
 -11  10 -33    0.23    0.13
  10   1 -33    0.18    0.13
 -11  13 -33    0.12    0.14
  13  -2 -33    0.14    0.12
   0  12 -33    0.04    0.13
   3   9 -33    0.28    0.12
   3   9 -33    0.53    0.16
   6   6 -33    0.15    0.13
   6   6 -33   -0.13    0.09
 -12   9 -33    0.12    0.13
   9   3 -33    0.24    0.13
   9   3 -33    0.47    0.14
 -12  12 -33    0.12    0.13
  12   0 -33    0.00    0.10
   2  11 -33    0.21    0.14
   5   8 -33    0.26    0.14
   5   8 -33    0.67    0.15
   8   5 -33    0.12    0.12
   8   5 -33    0.30    0.14
  11   2 -33    0.14    0.14
 -13  11 -33    0.21    0.15
   4  10 -33    0.26    0.16
   7   7 -33    0.16    0.14
   7   7 -33    0.24    0.15
  10   4 -33    0.02    0.14
  10   4 -33    0.13    0.14
   1  -1 -34   26.36    0.53
   1  -1 -34   26.05    0.54
  -1   0 -34   26.92    0.55
   0   1 -34   27.06    0.56
   0   1 -34   25.34    0.54
  -1   0 -34   26.26    0.57
  -2  -1 -34    0.06    0.09
  -1   3 -34    0.13    0.10
   3  -2 -34    0.14    0.08
   3  -2 -34    0.09    0.07
  -1   3 -34   -0.04    0.08
   2   0 -34    1.45    0.14
  -2   2 -34    1.25    0.15
   0  -2 -34    1.38    0.14
   2   0 -34    1.48    0.15
   0  -2 -34    1.24    0.13
  -2   2 -34    1.42    0.16
   5  -3 -34    0.96    0.13
  -2   5 -34    0.94    0.15
  -2   5 -34    0.73    0.13
   1   2 -34   -0.02    0.07
   2  -3 -34    0.10    0.07
  -3   1 -34    0.05    0.10
   2  -3 -34    0.09    0.07
   1   2 -34    0.11    0.08
  -3   4 -34    0.09    0.10
   4  -1 -34    0.15    0.08
  -3   4 -34    0.06    0.09
   4  -1 -34    0.22    0.08
  -3   7 -34    0.05    0.09
  -3   7 -34    0.05    0.10
   7  -4 -34    0.11    0.08
  -4   0 -34    0.03    0.08
   0   4 -34    0.18    0.09
   0   4 -34    0.28    0.10
   4  -4 -34    0.16    0.08
   3   1 -34    0.09    0.08
   1  -4 -34    0.20    0.08
  -4   3 -34    0.02    0.10
   3   1 -34    0.27    0.09
   6  -2 -34    0.37    0.09
  -4   6 -34    0.38    0.10
  -4   6 -34    0.32    0.12
   9  -5 -34    0.37    0.10
  -4   9 -34    0.52    0.12
  -4   9 -34    0.32    0.12
   6  -5 -34    2.91    0.18
  -1   6 -34    3.20    0.23
  -1   6 -34    2.98    0.21
   2   3 -34    0.86    0.13
   3  -5 -34    0.83    0.11
  -5   2 -34    0.94    0.14
   2   3 -34    1.16    0.15
   5   0 -34    2.55    0.19
   5   0 -34    2.49    0.17
  -5   5 -34    2.27    0.19
  -5   8 -34   -0.01    0.10
   8  -3 -34    0.16    0.09
  11  -6 -34    0.04    0.08
  -5  11 -34    0.04    0.10
   8  -6 -34    2.25    0.16
  -2   8 -34    2.65    0.20
  -2   8 -34    1.97    0.20
   1   5 -34    2.97    0.22
   1   5 -34    2.86    0.20
  -6   1 -34    2.63    0.20
   4   2 -34    0.48    0.11
   4   2 -34    0.55    0.12
  -6   4 -34    0.34    0.12
   7  -1 -34    5.23    0.26
  -6   7 -34    5.25    0.28
  -6  10 -34    0.14    0.11
  10  -4 -34    0.08    0.09
  13  -7 -34    0.22    0.11
  -6  13 -34    0.31    0.15
  10  -7 -34    0.26    0.10
  -3  10 -34    0.09    0.10
  -3  10 -34    0.26    0.12
   0   7 -34    2.69    0.23
   0   7 -34    2.47    0.20
  -7   3 -34    0.08    0.10
   3   4 -34   -0.02    0.08
   3   4 -34    0.14    0.10
  -7   6 -34    5.02    0.29
   6   1 -34    5.29    0.26
   6   1 -34    5.13    0.24
  -7   9 -34    1.04    0.17
   9  -2 -34    1.05    0.16
  -7  12 -34   -0.01    0.11
  12  -5 -34    0.08    0.10
  -4  12 -34   -0.05    0.11
  -1   9 -34    1.99    0.20
   2   6 -34    2.64    0.22
   2   6 -34    2.34    0.21
  -8   5 -34    0.02    0.10
   5   3 -34    0.27    0.11
   5   3 -34    0.18    0.09
   8   0 -34    1.81    0.19
  -8   8 -34    2.08    0.23
  -8  11 -34   -0.11    0.10
  11  -3 -34    0.08    0.09
  -8  14 -34    0.40    0.16
  14  -6 -34    0.12    0.12
  -5  14 -34    0.34    0.16
  -2  11 -34    0.05    0.12
  -2  11 -34    0.11    0.10
   1   8 -34    1.95    0.20
  -9   4 -34    0.41    0.14
   4   5 -34    0.50    0.13
   4   5 -34    0.43    0.13
   7   2 -34    1.06    0.15
  -9   7 -34    0.70    0.15
   7   2 -34    1.10    0.15
  10  -1 -34    0.03    0.09
  -9  10 -34    0.03    0.11
  -9  13 -34    0.17    0.12
  13  -4 -34    0.05    0.10
   4   9  34   -0.05    0.11
  -3  13 -34    0.08    0.13
   0  10 -34    0.03    0.12
   0  10 -34    0.15    0.12
   3   7 -34    0.15    0.11
   3   7 -34    0.28    0.12
   6   4 -34    0.29    0.12
 -10   6 -34   -0.05    0.10
   6   4 -34    0.06    0.09
   9   1 -34    0.31    0.12
 -10   9 -34    0.21    0.12
  12  -2 -34   -0.08    0.10
 -10  12 -34    0.06    0.12
  -1  12 -34    0.28    0.13
   2   9 -34    0.11    0.11
   2   9 -34   -0.04    0.10
   5   6 -34    0.11    0.10
   5   6 -34    0.17    0.12
   8   3 -34   -0.01    0.11
   8   3 -34    0.06    0.11
 -11   8 -34    0.02    0.11
 -11  11 -34    0.08    0.12
  11   0 -34   -0.02    0.11
   1  11 -34    0.19    0.13
   4   8 -34    0.24    0.13
   4   8 -34   -0.08    0.10
   7   5 -34    0.21    0.13
   7   5 -34   -0.05    0.09
  10   2 -34    0.04    0.12
 -12  10 -34   -0.16    0.12
   3  10 -34    0.00    0.13
   6   7 -34    0.17    0.14
   6   7 -34    0.42    0.15
   9   4 -34    0.20    0.13
 -13   9 -34    0.09    0.13
   9   4 -34    0.06    0.13
   5   9 -34    0.37    0.16
   5   9 -34    0.34    0.17
   8   6 -34    0.35    0.16
   8   6 -34    0.08    0.14
   1   0 -35    0.04    0.08
  -1   1 -35    0.06    0.08
  -1   1 -35    0.06    0.09
   0  -1 -35    0.10    0.08
   0  -1 -35    0.08    0.08
   1   0 -35    0.18    0.09
   0   2 -35    0.06    0.09
   0   2 -35    0.04    0.08
  -2   0 -35    0.03    0.08
   2  -2 -35   -0.07    0.07
   2  -2 -35   -0.01    0.08
  -2   0 -35    0.08    0.09
   3  -1 -35    1.33    0.13
  -1  -2 -35    1.22    0.14
   3  -1 -35    1.51    0.15
  -2   3 -35    1.09    0.15
  -2   3 -35    1.55    0.16
  -1  -2 -35    1.66    0.15
   4  -3 -35    3.71    0.20
  -1   4 -35    4.11    0.24
  -3  -1 -35    3.78    0.22
  -1   4 -35    3.71    0.22
  -3   2 -35    1.38    0.15
   2   1 -35    1.10    0.14
   1  -3 -35    1.42    0.14
  -3   2 -35    1.43    0.18
   1  -3 -35    1.41    0.14
   2   1 -35    1.20    0.14
  -3   5 -35    3.48    0.21
  -3   5 -35    3.46    0.24
   5  -2 -35    3.43    0.20
   6  -4 -35    0.23    0.09
  -2   6 -35    0.05    0.09
  -2   6 -35    0.07    0.09
   1   3 -35    3.90    0.23
   1   3 -35    3.61    0.21
  -4   1 -35    3.65    0.23
   3  -4 -35    3.70    0.19
  -4   4 -35   -0.11    0.09
   4   0 -35    0.07    0.08
   4   0 -35    0.01    0.08
  -4   7 -35    0.90    0.13
  -4   7 -35    1.28    0.18
   7  -3 -35    0.93    0.13
   8  -5 -35   -0.06    0.07
  -3   8 -35   -0.19    0.08
  -3   8 -35    0.02    0.10
   5  -5 -35    0.00    0.07
   0   5 -35    0.05    0.09
   0   5 -35    0.01    0.08
  -5   0 -35    0.32    0.11
   3   2 -35    3.21    0.20
   3   2 -35    3.46    0.20
   2  -5 -35    3.31    0.18
  -5   3 -35    3.12    0.22
   6  -1 -35    1.06    0.15
  -5   6 -35    0.80    0.15
   9  -4 -35    0.79    0.14
  -5   9 -35    0.54    0.13
  10  -6 -35    0.99    0.14
  -4  10 -35    1.15    0.16
  -4  10 -35    0.95    0.16
  -1   7 -35    0.24    0.11
   7  -6 -35    0.52    0.11
  -1   7 -35    0.65    0.15
   2   4 -35    0.13    0.09
  -6   2 -35    0.06    0.10
   2   4 -35    0.29    0.11
   5   1 -35    1.08    0.14
   5   1 -35    0.96    0.14
  -6   5 -35    0.84    0.16
   8  -2 -35    0.34    0.11
  -6   8 -35    0.23    0.12
  11  -5 -35    0.25    0.10
  -6  11 -35    0.04    0.10
  12  -7 -35    0.06    0.09
  -5  12 -35    0.07    0.11
  -2   9 -35    1.58    0.18
  -2   9 -35    1.67    0.20
   1   6 -35    0.46    0.13
   1   6 -35    0.45    0.11
   4   3 -35    0.64    0.12
   4   3 -35    1.05    0.15
  -7   4 -35    0.90    0.16
  -7   7 -35    0.06    0.09
   7   0 -35    0.17    0.10
  10  -3 -35    0.29    0.11
  -7  10 -35    0.41    0.14
  -7  13 -35    0.03    0.12
  13  -6 -35    0.01    0.10
  -6  14 -35    0.19    0.15
  -3  11 -35    0.01    0.11
  -3  11 -35    0.00    0.09
   0   8 -35   -0.05    0.09
   0   8 -35    0.07    0.09
   3   5 -35    0.03    0.08
   3   5 -35    0.09    0.09
  -8   3 -35    0.11    0.10
   6   2 -35    0.31    0.11
   6   2 -35    0.65    0.13
  -8   6 -35    0.17    0.11
   9  -1 -35    0.11    0.09
  -8   9 -35   -0.05    0.09
  12  -4 -35    0.29    0.11
  -8  12 -35    0.11    0.12
  -4  13 -35    0.41    0.16
  -1  10 -35    0.10    0.11
  -1  10 -35    0.00    0.10
   2   7 -35    1.54    0.19
   2   7 -35    1.52    0.18
  -9   5 -35    0.66    0.16
   5   4 -35    0.63    0.14
   5   4 -35    0.66    0.14
   8   1 -35    0.12    0.10
  -9   8 -35    0.18    0.12
  11  -2 -35    0.25    0.12
  -9  11 -35   -0.03    0.11
  14  -5 -35    0.02    0.11
  -9  14 -35   -0.08    0.12
   5   9  35    0.06    0.13
  -2  12 -35    0.19    0.13
   1   9 -35    0.05    0.11
   1   9 -35    0.05    0.11
   4   6 -35    1.07    0.18
   4   6 -35    1.44    0.19
   7   3 -35    0.29    0.12
   7   3 -35    0.38    0.12
 -10   7 -35    0.13    0.11
  10   0 -35   -0.08    0.10
 -10  10 -35   -0.04    0.11
  13  -3 -35    0.21    0.13
 -10  13 -35    0.07    0.13
   0  11 -35   -0.04    0.11
   3   8 -35    0.07    0.11
   3   8 -35    0.02    0.11
 -11   6 -35    0.31    0.13
   6   5 -35    0.22    0.12
   6   5 -35    0.17    0.12
   9   2 -35    0.17    0.12
 -11   9 -35    0.09    0.11
 -11  12 -35   -0.09    0.12
  12  -1 -35   -0.01    0.11
   2  10 -35    0.07    0.12
   2  10 -35    0.06    0.13
   5   7 -35    0.02    0.10
   5   7 -35    0.14    0.13
 -12   8 -35    0.29    0.13
   8   4 -35    0.27    0.13
   8   4 -35    0.28    0.14
  11   1 -35    0.20    0.14
 -12  11 -35    0.12    0.13
   4   9 -35    0.80    0.20
   4   9 -35    0.32    0.15
   7   6 -35    0.02    0.13
   7   6 -35    0.08    0.13
 -13  10 -35    0.24    0.14
  10   3 -35    0.18    0.14
   6   8 -35    0.37    0.16
   6   8 -35    0.19    0.15
   9   5 -35    0.05    0.16
   9   5 -35   -0.08    0.12
   0   0 -36   18.57    0.45
   0   0 -36   18.52    0.45
  -1  -1 -36    1.16    0.13
   2  -1 -36    1.21    0.13
  -1   2 -36    1.19    0.15
  -1  -1 -36    1.31    0.14
  -1   2 -36    1.31    0.14
   2  -1 -36    1.09    0.13
   1  -2 -36    1.23    0.13
   1   1 -36    1.39    0.15
   1  -2 -36    1.29    0.14
  -2   1 -36    1.47    0.15
  -2   1 -36    1.24    0.15
   1   1 -36    1.15    0.13
  -2   4 -36    2.48    0.18
   4  -2 -36    2.72    0.18
  -2  -2 -36    3.21    0.19
  -2   4 -36    2.53    0.21
   0   3 -36    3.47    0.22
   0   3 -36    3.12    0.20
  -3   0 -36    3.64    0.21
   3  -3 -36    3.65    0.19
   3   0 -36    1.26    0.14
   3   0 -36    1.35    0.15
  -3   3 -36    1.27    0.17
   0  -3 -36    1.35    0.14
  -3   3 -36    1.37    0.15
   0  -3 -36    1.33    0.14
  -3   6 -36    1.94    0.21
  -3   6 -36    1.98    0.19
   6  -3 -36    1.64    0.16
  -1   5 -36   -0.06    0.09
   5  -4 -36    0.08    0.08
  -1   5 -36    0.07    0.09
   2  -4 -36    2.89    0.17
   2   2 -36    2.95    0.20
   2   2 -36    3.07    0.20
  -4   2 -36    3.19    0.20
   5  -1 -36    0.18    0.08
  -4   5 -36    0.15    0.10
   5  -1 -36    0.14    0.08
  -4   8 -36    0.00    0.08
  -4   8 -36    0.02    0.11
   8  -4 -36    0.01    0.07
  -2   7 -36   -0.06    0.09
   7  -5 -36    0.03    0.07
  -2   7 -36   -0.07    0.08
   1   4 -36   -0.06    0.07
   4  -5 -36   -0.04    0.07
   1   4 -36    0.05    0.09
  -5   1 -36    0.15    0.10
  -5   4 -36    0.09    0.10
   4   1 -36    0.16    0.09
   4   1 -36    0.09    0.08
  -5   7 -36   -0.01    0.10
   7  -2 -36    0.03    0.07
  10  -5 -36    0.44    0.12
  -5  10 -36    0.36    0.14
   9  -6 -36    0.00    0.08
  -3   9 -36   -0.01    0.10
  -3   9 -36   -0.07    0.08
   0   6 -36    0.29    0.12
   0   6 -36    0.26    0.10
   6  -6 -36    0.21    0.09
   3   3 -36    1.59    0.17
  -6   3 -36    1.92    0.19
   3   3 -36    1.89    0.19
   6   0 -36    2.39    0.18
  -6   6 -36    2.22    0.22
   6   0 -36    1.90    0.19
  -6   9 -36    0.10    0.11
   9  -3 -36   -0.01    0.08
  -6  12 -36    0.05    0.12
  12  -6 -36   -0.03    0.09
  11  -7 -36    0.25    0.11
  -4  11 -36    0.09    0.11
  -4  11 -36    0.16    0.11
  -1   8 -36    1.07    0.18
  -1   8 -36    1.28    0.16
  -7   2 -36    0.13    0.10
   2   5 -36    0.04    0.09
   2   5 -36    0.03    0.09
  -7   5 -36    0.06    0.10
   5   2 -36    0.08    0.09
   5   2 -36    0.02    0.09
   8  -1 -36    1.37    0.17
  -7   8 -36    1.50    0.21
  11  -4 -36    0.33    0.11
  -7  11 -36    0.34    0.14
  -7  14 -36    0.43    0.17
  14  -7 -36   -0.04    0.10
  -5  13 -36    0.11    0.13
  -2  10 -36   -0.02    0.09
  -2  10 -36   -0.01    0.10
   1   7 -36    1.37    0.17
   1   7 -36    1.30    0.19
   4   4 -36    0.03    0.09
  -8   4 -36    0.15    0.10
   4   4 -36   -0.01    0.09
   7   1 -36    1.17    0.15
   7   1 -36    1.40    0.18
  -8   7 -36    1.20    0.18
  -8  10 -36    0.07    0.12
  10  -2 -36   -0.03    0.08
  -8  13 -36   -0.04    0.13
  13  -5 -36    0.09    0.10
  -3  12 -36    0.04    0.11
   0   9 -36    0.16    0.12
   0   9 -36    0.05    0.10
   3   6 -36    0.06    0.10
   3   6 -36   -0.01    0.09
  -9   6 -36    0.11    0.11
   6   3 -36    0.01    0.09
   6   3 -36    0.11    0.09
  -9   9 -36   -0.04    0.11
   9   0 -36    0.05    0.09
  -9  12 -36    0.18    0.13
  12  -3 -36    0.13    0.12
  -1  11 -36    0.56    0.16
   2   8 -36    0.02    0.10
   2   8 -36   -0.09    0.09
 -10   5 -36    0.26    0.12
   5   5 -36    0.31    0.13
   5   5 -36    0.38    0.13
 -10   8 -36    0.06    0.11
   8   2 -36    0.10    0.13
   8   2 -36    0.25    0.11
 -10  11 -36    0.12    0.13
  11  -1 -36    0.07    0.12
  -2  13 -36    0.05    0.13
   1  10 -36    0.41    0.14
   1  10 -36    0.47    0.14
   4   7 -36    0.16    0.12
   4   7 -36    0.16    0.11
 -11   7 -36    0.54    0.16
   7   4 -36    0.45    0.15
   7   4 -36    0.53    0.15
  10   1 -36    0.03    0.11
 -11  10 -36    0.22    0.14
 -11  13 -36    0.02    0.14
  13  -2 -36   -0.01    0.12
   0  12 -36    0.67    0.17
   3   9 -36    0.22    0.14
   3   9 -36    0.16    0.12
   6   6 -36    0.04    0.12
   6   6 -36    0.04    0.12
 -12   9 -36    0.26    0.15
   9   3 -36    0.25    0.14
   9   3 -36    0.18    0.12
 -12  12 -36   -0.02    0.13
  12   0 -36    0.08    0.13
   2  11 -36    0.14    0.15
   5   8 -36    0.02    0.12
   5   8 -36   -0.05    0.12
   8   5 -36    0.00    0.14
   8   5 -36    0.11    0.13
 -13  11 -36    0.01    0.13
  11   2 -36    0.07    0.15
   7   7 -36    0.09    0.14
   7   7 -36   -0.03    0.14
   0   1 -37   -0.09    0.06
   1  -1 -37    0.01    0.07
  -1   0 -37    0.01    0.07
   0   1 -37   -0.04    0.07
  -1   0 -37   -0.06    0.07
   1  -1 -37   -0.10    0.06
  -1   3 -37    1.22    0.15
  -2  -1 -37    1.75    0.17
  -1   3 -37    1.31    0.14
   3  -2 -37    1.29    0.14
   3  -2 -37    1.42    0.13
  -2   2 -37    0.04    0.06
  -2   2 -37   -0.04    0.07
   2   0 -37   -0.08    0.06
   0  -2 -37   -0.06    0.06
   0  -2 -37   -0.02    0.06
   2   0 -37   -0.05    0.07
  -2   5 -37    1.17    0.14
  -2   5 -37    1.01    0.15
   5  -3 -37    1.18    0.14
   1   2 -37    1.11    0.14
   2  -3 -37    1.56    0.13
  -3   1 -37    1.69    0.17
   1   2 -37    1.73    0.17
   2  -3 -37    1.31    0.13
  -3   4 -37    3.05    0.18
  -3   4 -37    2.90    0.21
   4  -1 -37    3.32    0.20
   4  -1 -37    3.16    0.18
  -3   7 -37    0.44    0.11
  -3   7 -37    0.23    0.11
   7  -4 -37    0.21    0.09
   4  -4 -37   -0.10    0.06
   0   4 -37    0.02    0.08
  -4   0 -37    0.11    0.08
   0   4 -37   -0.15    0.07
  -4   3 -37    3.02    0.22
   3   1 -37    3.01    0.20
   3   1 -37    3.12    0.20
   1  -4 -37    3.33    0.18
   6  -2 -37    1.08    0.14
  -4   6 -37    1.11    0.17
  -4   6 -37    1.08    0.15
  -4   9 -37    0.75    0.13
   9  -5 -37    0.67    0.12
  -4   9 -37    0.50    0.13
  -1   6 -37   -0.02    0.08
  -1   6 -37   -0.06    0.08
   6  -5 -37   -0.01    0.07
   2   3 -37    1.28    0.15
  -5   2 -37    1.34    0.16
   3  -5 -37    1.39    0.14
   2   3 -37    1.17    0.15
  -5   5 -37   -0.04    0.09
   5   0 -37    0.01    0.08
   5   0 -37   -0.05    0.07
  -5   8 -37    0.08    0.10
   8  -3 -37    0.10    0.08
  11  -6 -37    0.16    0.10
  -5  11 -37    0.19    0.13
  -2   8 -37    0.09    0.09
   8  -6 -37    0.12    0.08
  -2   8 -37    0.03    0.09
   1   5 -37   -0.02    0.08
   1   5 -37   -0.15    0.08
  -6   1 -37    0.08    0.08
  -6   4 -37    0.87    0.15
   4   2 -37    0.93    0.14
   4   2 -37    1.29    0.16
  -6   7 -37    0.85    0.15
   7  -1 -37    0.64    0.12
  -6  10 -37    0.48    0.15
  10  -4 -37    0.46    0.12
  -6  13 -37    0.19    0.15
  13  -7 -37    0.21    0.12
  -3  10 -37    0.56    0.15
  -3  10 -37    0.68    0.13
   0   7 -37   -0.14    0.09
   0   7 -37   -0.10    0.08
   3   4 -37    0.04    0.09
  -7   3 -37    0.37    0.12
   3   4 -37    0.33    0.12
  -7   6 -37    0.81    0.15
   6   1 -37    0.90    0.14
   6   1 -37    1.01    0.16
   9  -2 -37    0.04    0.08
  -7   9 -37    0.10    0.11
  -7  12 -37   -0.02    0.11
  12  -5 -37   -0.02    0.09
  -4  12 -37    0.37    0.15
  -1   9 -37    0.14    0.11
  -1   9 -37    0.09    0.11
   2   6 -37    0.05    0.09
   2   6 -37    0.08    0.10
   5   3 -37    0.06    0.09
   5   3 -37    0.04    0.09
  -8   5 -37    0.20    0.10
   8   0 -37   -0.01    0.08
  -8   8 -37   -0.05    0.11
  -8  11 -37   -0.05    0.10
  11  -3 -37   -0.13    0.08
  -2  11 -37   -0.03    0.10
  -2  11 -37   -0.02    0.13
   1   8 -37    0.29    0.12
   1   8 -37    0.20    0.11
  -9   4 -37    0.99    0.18
   4   5 -37    0.69    0.15
   4   5 -37    0.88    0.16
   7   2 -37   -0.03    0.09
  -9   7 -37   -0.03    0.10
   7   2 -37    0.15    0.11
  -9  10 -37   -0.01    0.11
  10  -1 -37   -0.04    0.09
  13  -4 -37    0.08    0.11
  -9  13 -37    0.10    0.13
  -3  13 -37    0.34    0.16
   0  10 -37    0.02    0.10
   0  10 -37    0.02    0.11
   3   7 -37    0.69    0.14
   3   7 -37    0.53    0.15
   6   4 -37    0.49    0.14
 -10   6 -37    1.02    0.19
   6   4 -37    0.57    0.14
 -10   9 -37   -0.03    0.10
   9   1 -37    0.07    0.10
  12  -2 -37    0.07    0.12
 -10  12 -37    0.15    0.14
  -1  12 -37    0.05    0.13
   2   9 -37   -0.02    0.11
   2   9 -37   -0.17    0.10
   5   6 -37   -0.03    0.12
   5   6 -37    0.10    0.11
   8   3 -37    0.11    0.12
   8   3 -37    0.06    0.11
 -11   8 -37    0.11    0.12
 -11  11 -37   -0.04    0.12
  11   0 -37   -0.03    0.10
   1  11 -37    0.06    0.13
   4   8 -37    0.28    0.13
   4   8 -37    0.34    0.14
   7   5 -37   -0.09    0.12
   7   5 -37    0.22    0.13
 -12  10 -37    0.26    0.15
  10   2 -37    0.24    0.14
   3  10 -37    0.46    0.16
   6   7 -37    0.20    0.15
   6   7 -37    0.04    0.12
 -13   9 -37    0.31    0.15
   9   4 -37    0.17    0.13
   9   4 -37    0.04    0.14
  -1   1 -38   17.48    0.44
   1   0 -38   17.33    0.43
   0  -1 -38   18.02    0.44
  -1   1 -38   17.59    0.45
   0  -1 -38   17.80    0.44
   1   0 -38   17.33    0.44
  -2   0 -38    1.20    0.13
   0   2 -38    1.21    0.14
   2  -2 -38    1.13    0.12
  -2   0 -38    1.42    0.16
   2  -2 -38    1.16    0.13
   0   2 -38    1.48    0.16
   3  -1 -38   -0.05    0.06
  -1  -2 -38    0.05    0.06
   3  -1 -38   -0.03    0.07
  -2   3 -38    0.05    0.08
  -2   3 -38    0.02    0.06
  -1  -2 -38    0.09    0.06
  -1   4 -38   -0.13    0.07
  -3  -1 -38    0.05    0.07
   4  -3 -38   -0.03    0.07
  -1   4 -38   -0.01    0.06
   2   1 -38   -0.12    0.06
  -3   2 -38    0.20    0.09
   1  -3 -38    0.03    0.06
  -3   2 -38    0.14    0.06
   1  -3 -38   -0.02    0.05
   2   1 -38   -0.02    0.06
  -3   5 -38    0.03    0.07
   5  -2 -38   -0.09    0.06
  -3   5 -38   -0.04    0.05
   6  -4 -38   -0.02    0.07
  -2   6 -38   -0.12    0.07
  -2   6 -38   -0.02    0.06
   1   3 -38   -0.05    0.08
  -4   1 -38    0.08    0.07
   1   3 -38   -0.10    0.07
   3  -4 -38   -0.05    0.06
   4   0 -38    1.76    0.16
  -4   4 -38    2.09    0.20
   4   0 -38    2.02    0.18
  -4   7 -38    0.02    0.08
   7  -3 -38    0.01    0.07
  -4   7 -38    0.08    0.08
  -3   8 -38    1.00    0.15
   8  -5 -38    0.92    0.14
  -3   8 -38    0.80    0.15
   0   5 -38    2.26    0.21
  -5   0 -38    2.37    0.22
   5  -5 -38    1.94    0.16
   0   5 -38    2.13    0.18
   3   2 -38   -0.06    0.07
  -5   3 -38   -0.03    0.07
   3   2 -38   -0.14    0.06
  -5   6 -38    1.86    0.19
   6  -1 -38    2.65    0.19
   9  -4 -38   -0.14    0.06
  -5   9 -38   -0.09    0.08
  10  -6 -38   -0.02    0.08
  -4  10 -38    0.00    0.08
  -4  10 -38   -0.04    0.09
  -1   7 -38    2.23    0.22
   7  -6 -38    1.94    0.16
  -1   7 -38    2.03    0.19
   2   4 -38   -0.08    0.07
   2   4 -38   -0.10    0.08
  -6   2 -38    0.20    0.10
   5   1 -38    2.46    0.19
  -6   5 -38    2.63    0.21
   5   1 -38    2.10    0.18
   8  -2 -38    1.41    0.17
  -6   8 -38    1.55    0.20
  11  -5 -38    0.03    0.09
  -6  11 -38   -0.01    0.10
  12  -7 -38   -0.01    0.10
  -5  12 -38   -0.02    0.11
  -2   9 -38    1.26    0.17
  -2   9 -38    0.97    0.17
   1   6 -38    2.31    0.21
   1   6 -38    2.46    0.23
  -7   4 -38    0.17    0.10
   4   3 -38    0.08    0.09
   4   3 -38    0.06    0.09
  -7   7 -38    4.49    0.27
   7   0 -38    4.41    0.26
  10  -3 -38   -0.15    0.07
  -7  10 -38   -0.13    0.09
  13  -6 -38    0.01    0.11
  -7  13 -38    0.05    0.13
  -3  11 -38    0.05    0.12
  -3  11 -38   -0.08    0.09
   0   8 -38    2.53    0.26
   0   8 -38    2.64    0.22
   3   5 -38    0.73    0.14
   3   5 -38    0.80    0.16
  -8   3 -38    0.84    0.15
   6   2 -38    1.29    0.16
  -8   6 -38    1.28    0.19
   6   2 -38    1.43    0.17
  -8   9 -38    0.86    0.16
   9  -1 -38    0.64    0.14
  12  -4 -38   -0.01    0.10
  -8  12 -38   -0.06    0.11
  -4  13 -38    0.35    0.15
  -1  10 -38    0.07    0.10
  -1  10 -38    0.15    0.12
   2   7 -38    0.98    0.16
   2   7 -38    0.97    0.18
   5   4 -38    0.05    0.10
   5   4 -38   -0.04    0.09
  -9   5 -38    0.01    0.10
   8   1 -38    0.69    0.15
  -9   8 -38    0.74    0.16
  11  -2 -38   -0.05    0.09
  -9  11 -38    0.01    0.11
  -2  12 -38    0.05    0.13
   1   9 -38    0.33    0.12
   1   9 -38    0.25    0.13
   4   6 -38    0.06    0.11
   4   6 -38   -0.06    0.10
   7   3 -38    0.09    0.11
 -10   7 -38   -0.05    0.10
   7   3 -38   -0.16    0.09
  10   0 -38   -0.03    0.10
 -10  10 -38   -0.08    0.11
  13  -3 -38   -0.13    0.10
 -10  13 -38    0.02    0.13
   0  11 -38    0.15    0.12
   3   8 -38    0.05    0.11
   3   8 -38   -0.15    0.09
 -11   6 -38    0.11    0.12
   6   5 -38    0.05    0.12
   6   5 -38    0.06    0.10
 -11   9 -38   -0.03    0.10
   9   2 -38   -0.01    0.11
  12  -1 -38    0.03    0.12
 -11  12 -38    0.09    0.13
   2  10 -38    0.01    0.12
   2  10 -38   -0.03    0.12
   5   7 -38    0.15    0.13
   5   7 -38    0.03    0.11
   8   4 -38   -0.03    0.12
 -12   8 -38    0.04    0.12
   8   4 -38   -0.08    0.11
  11   1 -38    0.05    0.12
 -12  11 -38   -0.05    0.12
   4   9 -38    0.24    0.15
   4   9 -38    0.21    0.14
   7   6 -38    0.16    0.15
   7   6 -38   -0.11    0.12
 -13  10 -38    0.02    0.13
  10   3 -38   -0.08    0.12
   0   0 -39    0.15    0.07
   0   0 -39    0.03    0.06
  -1  -1 -39   -0.01    0.05
  -1   2 -39   -0.07    0.05
   2  -1 -39   -0.08    0.04
  -1  -1 -39    0.00    0.05
   2  -1 -39   -0.12    0.05
  -1   2 -39   -0.02    0.05
   1   1 -39   -0.09    0.04
   1   1 -39    0.01    0.06
  -2   1 -39    0.01    0.06
   1  -2 -39    0.12    0.06
   1  -2 -39   -0.03    0.05
  -2   1 -39    0.02    0.06
  -2   4 -39    4.30    0.22
   4  -2 -39    3.78    0.21
  -2   4 -39    4.04    0.24
  -2  -2 -39    4.63    0.23
  -3   0 -39    0.10    0.07
   0   3 -39   -0.15    0.05
   3  -3 -39   -0.01    0.06
   0   3 -39   -0.10    0.06
   3   0 -39   -0.04    0.06
  -3   3 -39   -0.10    0.06
   0  -3 -39    0.07    0.06
   3   0 -39   -0.06    0.06
  -3   3 -39    0.01    0.06
   0  -3 -39   -0.04    0.05
  -3   6 -39    0.34    0.09
   6  -3 -39    0.34    0.10
  -3   6 -39    0.49    0.13
  -1   5 -39   -0.07    0.05
   5  -4 -39   -0.05    0.07
  -1   5 -39    0.01    0.08
   2   2 -39    4.11    0.22
   2   2 -39    3.87    0.22
   2  -4 -39    4.12    0.20
  -4   2 -39    4.51    0.24
   5  -1 -39    0.78    0.12
  -4   5 -39    0.89    0.14
   8  -4 -39   -0.09    0.07
  -4   8 -39    0.02    0.09
  -4   8 -39   -0.03    0.07
   7  -5 -39    0.14    0.08
  -2   7 -39    0.02    0.07
  -2   7 -39   -0.05    0.08
  -5   1 -39    0.04    0.07
   1   4 -39   -0.05    0.06
   4  -5 -39    0.00    0.07
   1   4 -39   -0.13    0.07
   4   1 -39    0.97    0.13
  -5   4 -39    1.04    0.16
   4   1 -39    1.16    0.14
   7  -2 -39    0.88    0.14
  -5   7 -39    0.69    0.14
  10  -5 -39    0.90    0.15
  -5  10 -39    0.75    0.16
   9  -6 -39    0.82    0.13
  -3   9 -39    1.31    0.17
  -3   9 -39    0.97    0.18
   0   6 -39   -0.02    0.08
   0   6 -39   -0.06    0.06
  -6   3 -39    0.47    0.12
   3   3 -39    0.38    0.11
   3   3 -39    0.14    0.08
  -6   6 -39    0.01    0.08
   6   0 -39   -0.10    0.07
  -6   9 -39    0.29    0.13
   9  -3 -39    0.24    0.10
  -6  12 -39   -0.04    0.10
  12  -6 -39    0.01    0.09
  -4  11 -39    0.10    0.10
  -4  11 -39    0.13    0.12
  -1   8 -39    0.25    0.11
  -1   8 -39    0.38    0.12
  -7   2 -39    0.07    0.09
   2   5 -39   -0.02    0.08
   2   5 -39   -0.01    0.07
  -7   5 -39    0.95    0.15
   5   2 -39    0.61    0.13
   5   2 -39    0.91    0.14
   8  -1 -39    0.07    0.08
  -7   8 -39    0.08    0.10
  -7  11 -39   -0.11    0.10
  11  -4 -39    0.06    0.10
  -5  13 -39    0.34    0.16
  -2  10 -39   -0.01    0.10
  -2  10 -39    0.18    0.11
   1   7 -39    0.16    0.11
   1   7 -39    0.17    0.11
   4   4 -39    0.08    0.09
  -8   4 -39   -0.06    0.08
   4   4 -39   -0.07    0.08
  -8   7 -39    0.08    0.09
   7   1 -39    0.08    0.08
  10  -2 -39   -0.03    0.08
  -8  10 -39    0.06    0.10
  -8  13 -39    0.09    0.14
  13  -5 -39   -0.05    0.11
  -3  12 -39    0.25    0.14
   0   9 -39   -0.19    0.07
   0   9 -39    0.04    0.09
   3   6 -39    1.16    0.17
   3   6 -39    0.92    0.17
   6   3 -39    0.32    0.12
  -9   6 -39    0.34    0.13
   6   3 -39    0.17    0.10
   9   0 -39   -0.06    0.08
  -9   9 -39    0.01    0.10
  -9  12 -39    0.12    0.13
  12  -3 -39    0.01    0.10
  -1  11 -39    0.00    0.11
  -1  11 -39   -0.08    0.11
   2   8 -39   -0.01    0.11
   2   8 -39    0.26    0.13
   5   5 -39    0.54    0.14
 -10   5 -39    0.93    0.18
   5   5 -39    0.76    0.16
   8   2 -39   -0.12    0.09
 -10   8 -39    0.00    0.10
 -10  11 -39   -0.10    0.11
  11  -1 -39   -0.07    0.08
   1  10 -39   -0.05    0.11
   1  10 -39    0.09    0.13
   4   7 -39    0.03    0.11
   4   7 -39   -0.07    0.10
   7   4 -39   -0.02    0.10
   7   4 -39    0.00    0.12
 -11   7 -39    0.26    0.12
  10   1 -39   -0.07    0.11
 -11  10 -39    0.03    0.12
   3   9 -39    0.16    0.14
   3   9 -39    0.09    0.13
   6   6 -39   -0.12    0.10
   6   6 -39   -0.02    0.13
 -12   9 -39    0.23    0.15
   9   3 -39    0.05    0.12
   5   8 -39    0.25    0.16
   5   8 -39    0.38    0.16
   8   5 -39    0.04    0.12
   8   5 -39   -0.04    0.13
  -1   0 -40   12.89    0.38
  -1   0 -40   13.11    0.37
   0   1 -40   13.60    0.39
   1  -1 -40   12.86    0.37
   1  -1 -40   13.57    0.37
   0   1 -40   13.52    0.39
   3  -2 -40   -0.03    0.06
  -1   3 -40    0.13    0.07
  -1   3 -40    0.03    0.07
  -2  -1 -40    0.05    0.07
   0  -2 -40    1.90    0.15
   2   0 -40    1.87    0.15
   0  -2 -40    2.03    0.15
  -2   2 -40    1.84    0.17
  -2   2 -40    2.16    0.20
   2   0 -40    1.82    0.17
  -2   5 -40    0.33    0.09
  -2   5 -40    0.15    0.09
   5  -3 -40    0.20    0.08
   1   2 -40   -0.05    0.06
  -3   1 -40   -0.02    0.06
   1   2 -40   -0.09    0.04
   2  -3 -40   -0.03    0.06
  -3   4 -40   -0.02    0.06
   4  -1 -40   -0.03    0.06
   4  -1 -40   -0.07    0.06
  -3   4 -40   -0.06    0.06
  -3   7 -40   -0.03    0.07
  -3   7 -40    0.08    0.07
   7  -4 -40   -0.11    0.06
   4  -4 -40    0.22    0.08
  -4   0 -40    0.26    0.09
   0   4 -40    0.09    0.09
   0   4 -40    0.22    0.09
   3   1 -40   -0.14    0.05
   3   1 -40   -0.05    0.06
   1  -4 -40    0.04    0.05
  -4   3 -40   -0.02    0.07
  -4   6 -40   -0.09    0.07
  -4   6 -40   -0.01    0.05
   6  -2 -40   -0.04    0.06
  -4   9 -40   -0.04    0.08
   9  -5 -40   -0.06    0.07
  -4   9 -40   -0.15    0.08
  -1   6 -40    0.13    0.09
  -1   6 -40    0.20    0.08
   6  -5 -40    0.13    0.08
  -5   2 -40    0.32    0.09
   2   3 -40    0.34    0.10
   3  -5 -40    0.26    0.08
   2   3 -40    0.22    0.09
   5   0 -40    2.40    0.18
  -5   5 -40    2.58    0.21
   5   0 -40    1.91    0.18
   8  -3 -40    0.06    0.08
  -5   8 -40   -0.03    0.09
  11  -6 -40   -0.05    0.08
  -5  11 -40    0.04    0.11
  -2   8 -40    0.99    0.15
  -2   8 -40    0.60    0.14
   8  -6 -40    0.68    0.12
   1   5 -40    0.18    0.08
  -6   1 -40    0.33    0.11
   1   5 -40    0.15    0.10
   4   2 -40   -0.13    0.07
  -6   4 -40   -0.05    0.07
   4   2 -40   -0.04    0.07
  -6   7 -40    1.56    0.19
   7  -1 -40    1.76    0.19
  10  -4 -40    0.08    0.09
  -6  10 -40    0.05    0.11
  -6  13 -40    0.09    0.15
  -3  10 -40    0.14    0.10
  -3  10 -40    0.08    0.10
   0   7 -40    2.81    0.22
   0   7 -40    2.70    0.23
   3   4 -40   -0.13    0.08
   3   4 -40   -0.13    0.07
  -7   3 -40   -0.01    0.07
  -7   6 -40    1.93    0.21
   6   1 -40    1.63    0.18
   6   1 -40    1.81    0.18
  -7   9 -40    0.17    0.11
   9  -2 -40    0.07    0.09
  -7  12 -40    0.03    0.12
  12  -5 -40   -0.13    0.09
  -4  12 -40   -0.07    0.12
  -1   9 -40    0.81    0.15
  -1   9 -40    0.48    0.15
   2   6 -40    0.79    0.14
   2   6 -40    0.75    0.15
   5   3 -40   -0.05    0.09
   5   3 -40   -0.10    0.06
  -8   5 -40    0.18    0.10
   8   0 -40    0.96    0.15
  -8   8 -40    1.30    0.20
  -8  11 -40    0.01    0.10
  11  -3 -40   -0.05    0.09
  -2  11 -40   -0.05    0.10
  -2  11 -40   -0.07    0.10
   1   8 -40    0.59    0.14
   1   8 -40    0.14    0.12
  -9   4 -40    0.00    0.09
   4   5 -40   -0.07    0.09
   4   5 -40   -0.09    0.08
   7   2 -40    0.19    0.10
  -9   7 -40    0.18    0.11
   7   2 -40    0.32    0.12
  10  -1 -40   -0.08    0.08
  -9  10 -40   -0.11    0.11
  -9  13 -40   -0.06    0.12
   0  10 -40   -0.06    0.10
   0  10 -40    0.00    0.11
   3   7 -40   -0.10    0.10
   3   7 -40    0.11    0.11
 -10   6 -40    0.12    0.11
   6   4 -40    0.03    0.10
   6   4 -40    0.07    0.11
 -10   9 -40   -0.15    0.09
   9   1 -40   -0.01    0.08
 -10  12 -40   -0.02    0.12
  12  -2 -40   -0.11    0.09
   2   9 -40   -0.06    0.12
   2   9 -40   -0.09    0.10
   5   6 -40   -0.02    0.11
   5   6 -40    0.02    0.10
   8   3 -40   -0.02    0.12
 -11   8 -40    0.12    0.12
   8   3 -40   -0.15    0.09
  11   0 -40    0.04    0.11
 -11  11 -40    0.07    0.12
   4   8 -40   -0.08    0.11
   4   8 -40    0.01    0.11
   7   5 -40    0.06    0.14
   7   5 -40   -0.13    0.11
 -12   7 -40   -0.15    0.09
  10   2 -40    0.01    0.12
 -12  10 -40   -0.05    0.12
   6   7 -40    0.27    0.16
   6   7 -40    0.15    0.15
 -13   9 -40   -0.02    0.13
   0  -1 -41   -0.06    0.05
  -1   1 -41    0.01    0.06
   1   0 -41    0.01    0.06
   0  -1 -41    0.04    0.06
  -1   1 -41    0.05    0.07
   1   0 -41    0.02    0.05
   0   2 -41    0.07    0.06
  -2   0 -41   -0.08    0.05
   2  -2 -41   -0.09    0.05
   0   2 -41    0.02    0.06
  -2   0 -41    0.02    0.06
   2  -2 -41   -0.02    0.05
   3  -1 -41    1.60    0.15
  -2   3 -41    1.84    0.16
   3  -1 -41    1.46    0.15
  -1  -2 -41    1.69    0.16
  -2   3 -41    1.68    0.18
  -1   4 -41    0.16    0.09
  -3  -1 -41    0.19    0.08
   4  -3 -41    0.16    0.08
  -1   4 -41    0.22    0.08
   1  -3 -41    1.75    0.14
   2   1 -41    1.63    0.17
   2   1 -41    1.65    0.16
   1  -3 -41    1.74    0.16
  -3   2 -41    1.69    0.18
  -3   5 -41    1.45    0.16
   5  -2 -41    1.43    0.16
  -3   5 -41    1.56    0.19
  -2   6 -41    0.59    0.12
  -2   6 -41    0.56    0.14
   6  -4 -41    0.46    0.10
   1   3 -41    0.12    0.08
   1   3 -41    0.05    0.07
  -4   1 -41    0.26    0.09
   3  -4 -41    0.21    0.08
   4   0 -41   -0.04    0.07
   4   0 -41    0.02    0.07
  -4   4 -41    0.05    0.07
   7  -3 -41    0.20    0.09
  -4   7 -41    0.47    0.11
  -4   7 -41    0.24    0.11
  -3   8 -41    0.29    0.10
  -3   8 -41    0.29    0.11
   8  -5 -41    0.16    0.09
   0   5 -41   -0.05    0.08
  -5   0 -41    0.05    0.07
   5  -5 -41   -0.01    0.06
   0   5 -41    0.02    0.07
   3   2 -41    1.74    0.18
   3   2 -41    1.20    0.15
  -5   3 -41    1.70    0.19
  -5   6 -41    0.40    0.12
   6  -1 -41    0.54    0.12
   9  -4 -41    0.42    0.12
  -5   9 -41    0.41    0.13
  -4  10 -41    0.91    0.15
  10  -6 -41    0.75    0.14
  -4  10 -41    0.66    0.16
  -1   7 -41    0.14    0.10
  -1   7 -41   -0.05    0.07
   2   4 -41    0.33    0.11
  -6   2 -41    0.45    0.13
   2   4 -41    0.22    0.08
  -6   5 -41    0.40    0.11
   5   1 -41    0.55    0.12
   5   1 -41    0.47    0.11
   8  -2 -41    0.02    0.08
  -6   8 -41    0.12    0.10
  -6  11 -41    0.04    0.11
  11  -5 -41    0.19    0.10
  -5  12 -41   -0.08    0.10
  -2   9 -41    0.50    0.13
  -2   9 -41    0.31    0.13
   1   6 -41    0.11    0.09
   1   6 -41    0.03    0.09
  -7   4 -41    0.29    0.11
   4   3 -41    0.25    0.09
   4   3 -41    0.11    0.09
   7   0 -41   -0.07    0.07
  -7   7 -41   -0.10    0.07
  10  -3 -41   -0.03    0.08
  -7  10 -41   -0.03    0.09
  13  -6 -41    0.11    0.12
  -7  13 -41    0.11    0.14
  -3  11 -41    0.03    0.09
  -3  11 -41   -0.06    0.10
   0   8 -41   -0.21    0.08
   0   8 -41    0.01    0.08
   3   5 -41    0.32    0.12
   3   5 -41    0.24    0.11
  -8   3 -41    0.10    0.10
   6   2 -41   -0.04    0.08
  -8   6 -41    0.06    0.09
   6   2 -41    0.01    0.08
  -8   9 -41    0.01    0.10
   9  -1 -41   -0.03    0.07
  12  -4 -41   -0.06    0.10
  -8  12 -41    0.02    0.11
  -1  10 -41   -0.02    0.09
  -1  10 -41    0.03    0.10
   2   7 -41    0.16    0.11
   2   7 -41    0.32    0.14
  -9   5 -41    0.41    0.13
   5   4 -41    0.40    0.13
   5   4 -41    0.51    0.13
   8   1 -41   -0.13    0.08
  -9   8 -41    0.08    0.10
  -9  11 -41    0.15    0.11
  11  -2 -41    0.08    0.10
  -2  12 -41    0.21    0.14
   1   9 -41   -0.15    0.09
   1   9 -41   -0.07    0.09
   4   6 -41    0.71    0.15
   4   6 -41    0.44    0.14
   7   3 -41   -0.09    0.08
 -10   7 -41   -0.10    0.10
   7   3 -41    0.10    0.11
  10   0 -41    0.07    0.10
 -10  10 -41    0.01    0.10
   0  11 -41   -0.06    0.11
   3   8 -41   -0.13    0.10
   3   8 -41   -0.11    0.09
   6   5 -41    0.04    0.11
   6   5 -41    0.15    0.12
 -11   6 -41    0.23    0.12
 -11   9 -41    0.03    0.11
   9   2 -41   -0.05    0.11
   2  10 -41    0.18    0.14
   2  10 -41    0.12    0.13
   5   7 -41    0.12    0.13
   5   7 -41   -0.10    0.11
   8   4 -41   -0.10    0.11
 -12   8 -41   -0.04    0.10
   8   4 -41   -0.20    0.12
   7   6 -41   -0.14    0.13
   7   6 -41   -0.03    0.13
   0   0 -42   16.85    0.44
   0   0 -42   16.72    0.45
   2  -1 -42    1.14    0.13
   2  -1 -42    1.20    0.14
  -1  -1 -42    1.53    0.16
  -1   2 -42    1.30    0.15
  -1  -1 -42    1.37    0.14
  -1   2 -42    1.06    0.13
  -2   1 -42    1.35    0.16
   1  -2 -42    1.31    0.14
   1   1 -42    1.21    0.14
   1  -2 -42    1.43    0.15
   1   1 -42    1.49    0.16
  -2   1 -42    1.30    0.14
   4  -2 -42    0.54    0.10
  -2   4 -42    0.58    0.11
  -2   4 -42    0.61    0.13
  -2  -2 -42    0.60    0.11
   0   3 -42    0.27    0.09
  -3   0 -42    0.22    0.09
   3  -3 -42    0.17    0.07
   0   3 -42    0.10    0.07
   0  -3 -42    0.01    0.06
  -3   3 -42    0.03    0.06
  -3   3 -42    0.02    0.06
   3   0 -42   -0.06    0.05
   3   0 -42   -0.04    0.06
   0  -3 -42    0.01    0.06
  -3   6 -42    0.15    0.08
   6  -3 -42    0.29    0.09
  -3   6 -42    0.25    0.10
  -1   5 -42    0.10    0.07
  -1   5 -42    0.05    0.08
   5  -4 -42    0.06    0.07
  -4   2 -42    0.37    0.10
   2   2 -42    0.48    0.11
   2   2 -42    0.40    0.10
   2  -4 -42    0.50    0.10
  -4   5 -42    0.05    0.08
   5  -1 -42    0.04    0.07
  -4   8 -42    0.15    0.09
   8  -4 -42   -0.03    0.07
  -4   8 -42   -0.04    0.08
  -2   7 -42    0.07    0.09
  -2   7 -42    0.08    0.10
   7  -5 -42    0.28    0.09
   1   4 -42    0.07    0.08
   1   4 -42   -0.06    0.07
   4  -5 -42    0.05    0.07
  -5   1 -42    0.09    0.08
   4   1 -42   -0.05    0.07
   4   1 -42   -0.07    0.06
  -5   4 -42   -0.03    0.07
   7  -2 -42    0.29    0.10
  -5   7 -42    0.39    0.11
  -5  10 -42    0.03    0.10
  10  -5 -42   -0.01    0.08
  -3   9 -42    0.08    0.09
  -3   9 -42   -0.06    0.09
   9  -6 -42   -0.03    0.09
   0   6 -42    0.54    0.13
   0   6 -42    0.53    0.11
  -6   3 -42    0.43    0.11
   3   3 -42    0.39    0.11
   3   3 -42    0.41    0.10
   6   0 -42    1.12    0.15
  -6   6 -42    1.13    0.17
   9  -3 -42   -0.06    0.08
  -6   9 -42   -0.05    0.09
  12  -6 -42   -0.05    0.09
  -6  12 -42    0.03    0.12
  -4  11 -42    0.15    0.12
  -4  11 -42   -0.05    0.09
  -1   8 -42    1.10    0.16
  -1   8 -42    0.92    0.16
  -7   2 -42    0.30    0.11
   2   5 -42    0.26    0.12
   2   5 -42    0.26    0.10
  -7   5 -42    0.30    0.11
   5   2 -42    0.30    0.11
   5   2 -42    0.21    0.10
  -7   8 -42    0.93    0.17
   8  -1 -42    0.66    0.13
  11  -4 -42    0.09    0.09
  -7  11 -42   -0.02    0.11
  -2  10 -42   -0.06    0.10
  -2  10 -42    0.04    0.11
   1   7 -42    0.92    0.17
   1   7 -42    1.18    0.17
   4   4 -42   -0.05    0.09
  -8   4 -42    0.05    0.09
   4   4 -42   -0.02    0.07
  -8   7 -42    0.99    0.17
   7   1 -42    0.84    0.15
  10  -2 -42   -0.02    0.07
  -8  10 -42    0.03    0.10
  -3  12 -42   -0.01    0.12
   0   9 -42    0.28    0.12
   0   9 -42    0.12    0.12
   3   6 -42    0.07    0.10
   3   6 -42   -0.05    0.08
   6   3 -42   -0.05    0.09
   6   3 -42   -0.17    0.08
  -9   6 -42   -0.02    0.09
  -9   9 -42    0.15    0.11
   9   0 -42   -0.14    0.08
  12  -3 -42   -0.12    0.08
  -9  12 -42   -0.07    0.12
  -1  11 -42    0.26    0.13
  -1  11 -42    0.11    0.12
   2   8 -42    0.15    0.12
   2   8 -42    0.18    0.13
   5   5 -42   -0.05    0.10
   5   5 -42   -0.15    0.09
 -10   5 -42   -0.04    0.09
 -10   8 -42    0.04    0.10
   8   2 -42   -0.04    0.11
 -10  11 -42   -0.10    0.10
  11  -1 -42   -0.01    0.11
   1  10 -42   -0.02    0.12
   1  10 -42    0.19    0.13
   4   7 -42   -0.14    0.09
   4   7 -42   -0.04    0.11
   7   4 -42    0.12    0.13
 -11   7 -42   -0.04    0.11
   7   4 -42   -0.04    0.11
  10   1 -42   -0.12    0.11
 -11  10 -42   -0.03    0.11
   3   9 -42   -0.19    0.12
   3   9 -42    0.01    0.13
   6   6 -42    0.01    0.12
   6   6 -42   -0.04    0.12
   9   3 -42   -0.03    0.13
 -12   9 -42    0.02    0.12
   0   1 -43    0.01    0.07
  -1   0 -43    0.04    0.07
   0   1 -43    0.06    0.07
   1  -1 -43    0.12    0.07
  -1   0 -43   -0.07    0.06
   1  -1 -43    0.00    0.06
   3  -2 -43    0.37    0.09
  -1   3 -43    0.54    0.10
  -1   3 -43    0.56    0.12
  -2  -1 -43    0.54    0.11
   2   0 -43   -0.03    0.05
   0  -2 -43    0.06    0.07
   0  -2 -43    0.02    0.07
   2   0 -43    0.01    0.06
  -2   2 -43   -0.02    0.06
  -2   2 -43    0.08    0.07
  -2   5 -43    0.65    0.13
  -2   5 -43    0.49    0.11
   5  -3 -43    0.48    0.11
   1   2 -43    0.54    0.11
   2  -3 -43    0.82    0.12
   1   2 -43    0.44    0.10
  -3   1 -43    0.36    0.10
  -3   4 -43    1.08    0.15
  -3   4 -43    0.84    0.12
   4  -1 -43    0.79    0.12
  -3   7 -43    0.03    0.08
  -3   7 -43   -0.01    0.06
   7  -4 -43   -0.08    0.06
  -4   0 -43   -0.05    0.06
   0   4 -43    0.03    0.07
   0   4 -43    0.01    0.06
   4  -4 -43   -0.01    0.06
   3   1 -43    0.78    0.12
   3   1 -43    0.67    0.12
   1  -4 -43    0.85    0.12
  -4   3 -43    0.91    0.14
   6  -2 -43    0.69    0.12
  -4   6 -43    0.89    0.16
  -4   6 -43    0.56    0.11
   9  -5 -43    0.57    0.12
  -4   9 -43    0.79    0.14
  -4   9 -43    0.56    0.15
   6  -5 -43    0.07    0.07
  -1   6 -43    0.00    0.08
  -1   6 -43    0.12    0.08
  -5   2 -43    0.58    0.12
   2   3 -43    0.58    0.12
   2   3 -43    0.63    0.12
  -5   5 -43    0.04    0.08
   5   0 -43    0.01    0.06
  -5   8 -43    0.02    0.09
   8  -3 -43   -0.11    0.06
  -5  11 -43    0.21    0.13
  11  -6 -43    0.14    0.10
  -2   8 -43    0.61    0.14
  -2   8 -43    0.47    0.14
   1   5 -43    0.00    0.08
  -6   1 -43    0.05    0.09
   1   5 -43   -0.09    0.06
   4   2 -43    0.85    0.14
   4   2 -43    0.86    0.13
  -6   4 -43    0.63    0.14
  -6   7 -43    0.15    0.10
   7  -1 -43    0.14    0.09
  -6  10 -43    0.25    0.13
  10  -4 -43    0.16    0.10
  -3  10 -43    0.50    0.13
  -3  10 -43    0.41    0.15
   0   7 -43    0.01    0.09
   0   7 -43   -0.16    0.08
   3   4 -43   -0.01    0.07
   3   4 -43   -0.05    0.08
  -7   3 -43    0.05    0.10
   6   1 -43    0.08    0.09
  -7   6 -43    0.21    0.11
   9  -2 -43    0.01    0.08
  -7   9 -43    0.13    0.11
  -7  12 -43    0.01    0.12
  12  -5 -43   -0.08    0.09
  -4  12 -43    0.13    0.13
  -1   9 -43    0.03    0.10
  -1   9 -43   -0.05    0.10
   2   6 -43    0.43    0.13
   2   6 -43    0.44    0.12
   5   3 -43   -0.10    0.08
   5   3 -43   -0.14    0.07
  -8   5 -43    0.06    0.09
   8   0 -43   -0.08    0.08
  -8   8 -43   -0.08    0.10
  -8  11 -43    0.05    0.12
  11  -3 -43   -0.05    0.08
  -2  11 -43    0.00    0.11
  -2  11 -43   -0.02    0.11
   1   8 -43   -0.15    0.09
   1   8 -43    0.02    0.10
  -9   4 -43    0.88    0.17
   4   5 -43    0.65    0.14
   4   5 -43    0.75    0.15
  -9   7 -43   -0.09    0.09
   7   2 -43    0.06    0.09
  -9  10 -43   -0.09    0.10
  10  -1 -43   -0.01    0.08
   0  10 -43   -0.01    0.11
   0  10 -43   -0.10    0.11
   3   7 -43    0.39    0.15
   3   7 -43    0.51    0.14
 -10   6 -43    0.33    0.13
   6   4 -43    0.05    0.11
   6   4 -43    0.22    0.12
 -10   9 -43    0.07    0.11
   9   1 -43   -0.09    0.10
   2   9 -43   -0.15    0.10
   2   9 -43   -0.06    0.11
   5   6 -43    0.15    0.13
   5   6 -43   -0.04    0.11
 -11   8 -43    0.05    0.11
   8   3 -43   -0.09    0.08
   4   8 -43    0.28    0.16
   4   8 -43    0.12    0.13
 -12   7 -43    0.06    0.13
   7   5 -43    0.07    0.14
   7   5 -43   -0.09    0.12
   1   0 -44    6.59    0.28
  -1   1 -44    6.75    0.29
   0  -1 -44    6.74    0.27
   1   0 -44    6.88    0.27
   0  -1 -44    6.52    0.27
  -1   1 -44    6.43    0.27
   0   2 -44    0.09    0.08
   2  -2 -44    0.13    0.07
  -2   0 -44    0.23    0.09
   0   2 -44    0.21    0.08
  -2   3 -44   -0.03    0.06
   3  -1 -44   -0.05    0.06
  -1  -2 -44   -0.02    0.06
  -2   3 -44    0.06    0.07
   4  -3 -44    0.03    0.07
  -3  -1 -44    0.20    0.09
  -1   4 -44   -0.01    0.07
  -1   4 -44   -0.02    0.06
   2   1 -44    0.01    0.07
   2   1 -44   -0.07    0.05
   1  -3 -44   -0.01    0.06
  -3   2 -44   -0.03    0.06
  -3   5 -44    0.60    0.12
   5  -2 -44    0.64    0.12
  -3   5 -44    0.69    0.14
  -2   6 -44   -0.09    0.05
  -2   6 -44   -0.03    0.08
   6  -4 -44    0.10    0.07
  -4   1 -44    0.09    0.08
   1   3 -44   -0.03    0.06
   1   3 -44    0.11    0.07
   3  -4 -44    0.15    0.08
  -4   4 -44    0.19    0.10
   4   0 -44    0.01    0.06
  -4   7 -44    0.03    0.07
  -4   7 -44   -0.02    0.08
   7  -3 -44   -0.07    0.06
   8  -5 -44   -0.05    0.07
  -3   8 -44   -0.08    0.08
  -3   8 -44   -0.09    0.08
   0   5 -44    0.16    0.09
   0   5 -44   -0.01    0.07
  -5   0 -44    0.01    0.08
   5  -5 -44    0.14    0.08
  -5   3 -44    0.42    0.12
   3   2 -44    0.35    0.10
   3   2 -44    0.41    0.11
   6  -1 -44    0.50    0.12
  -5   6 -44    0.67    0.14
   9  -4 -44    0.02    0.08
  -5   9 -44    0.14    0.11
  -4  10 -44    0.00    0.09
  10  -6 -44    0.04    0.08
  -4  10 -44   -0.09    0.10
  -1   7 -44    1.56    0.19
  -1   7 -44    1.16    0.17
   2   4 -44    0.01    0.07
  -6   2 -44    0.01    0.08
   2   4 -44   -0.07    0.07
   5   1 -44    0.35    0.10
   5   1 -44    0.67    0.14
  -6   5 -44    0.67    0.14
  -6   8 -44    0.31    0.12
   8  -2 -44    0.37    0.11
  -6  11 -44   -0.05    0.11
  11  -5 -44    0.08    0.09
  -5  12 -44   -0.02    0.13
  -2   9 -44    0.38    0.13
  -2   9 -44    0.44    0.13
   1   6 -44    0.93    0.16
   1   6 -44    1.30    0.18
   4   3 -44   -0.09    0.08
   4   3 -44   -0.16    0.06
  -7   4 -44   -0.04    0.08
   7   0 -44    1.05    0.16
  -7   7 -44    1.24    0.20
  10  -3 -44    0.03    0.09
  -7  10 -44   -0.04    0.10
  -3  11 -44   -0.17    0.09
  -3  11 -44    0.03    0.11
   0   8 -44    0.69    0.15
   0   8 -44    0.43    0.14
  -8   3 -44   -0.13    0.08
   3   5 -44   -0.04    0.09
   3   5 -44   -0.05    0.08
  -8   6 -44    0.30    0.12
   6   2 -44    0.33    0.13
   6   2 -44    0.57    0.13
  -8   9 -44    0.17    0.12
   9  -1 -44    0.11    0.10
  12  -4 -44    0.01    0.10
  -8  12 -44   -0.12    0.11
  -1  10 -44    0.04    0.11
  -1  10 -44    0.16    0.13
   2   7 -44    0.68    0.15
   2   7 -44    0.30    0.14
   5   4 -44   -0.08    0.08
   5   4 -44   -0.05    0.10
  -9   5 -44    0.03    0.10
   8   1 -44    0.19    0.11
  -9   8 -44    0.13    0.12
  -9  11 -44    0.18    0.14
  11  -2 -44    0.04    0.11
   1   9 -44    0.14    0.12
   1   9 -44   -0.09    0.11
   4   6 -44    0.00    0.10
   4   6 -44   -0.09    0.10
   7   3 -44   -0.05    0.11
 -10   7 -44   -0.06    0.10
  10   0 -44   -0.18    0.10
 -10  10 -44    0.00    0.12
   3   8 -44   -0.02    0.12
   3   8 -44    0.01    0.12
 -11   6 -44    0.07    0.11
   6   5 -44    0.03    0.11
   6   5 -44   -0.03    0.12
   9   2 -44   -0.13    0.10
 -11   9 -44   -0.03    0.10
   5   7 -44   -0.03    0.13
   5   7 -44   -0.11    0.12
   8   4 -44   -0.08    0.12
 -12   8 -44    0.11    0.14
   0   0 -45    0.09    0.07
   0   0 -45   -0.02    0.06
  -1   2 -45    0.07    0.06
  -1   2 -45    0.18    0.08
  -1  -1 -45    0.06    0.07
   2  -1 -45    0.07    0.07
   2  -1 -45    0.05    0.06
  -1  -1 -45    0.10    0.07
  -2   1 -45    0.11    0.07
   1  -2 -45    0.06    0.06
   1   1 -45    0.06    0.07
   1  -2 -45    0.09    0.07
   1   1 -45    0.20    0.08
  -2   1 -45    0.06    0.07
  -2   4 -45    0.39    0.09
  -2   4 -45    0.49    0.12
   4  -2 -45    0.56    0.12
  -2  -2 -45    0.52    0.12
   3  -3 -45   -0.02    0.06
  -3   0 -45   -0.03    0.07
   0   3 -45   -0.02    0.07
   0   3 -45   -0.02    0.07
   3   0 -45   -0.04    0.06
  -3   3 -45    0.02    0.07
  -3   3 -45    0.00    0.06
   0  -3 -45   -0.01    0.06
   3   0 -45   -0.01    0.06
   0  -3 -45   -0.06    0.06
  -3   6 -45    0.99    0.17
  -3   6 -45    0.86    0.15
   6  -3 -45    0.89    0.14
  -1   5 -45    0.32    0.11
  -1   5 -45    0.18    0.10
   5  -4 -45    0.15    0.08
   2   2 -45    0.45    0.11
   2  -4 -45    0.83    0.12
  -4   2 -45    0.74    0.14
   2   2 -45    0.76    0.13
  -4   5 -45    0.45    0.13
   5  -1 -45    0.37    0.11
   8  -4 -45    0.11    0.09
  -4   8 -45    0.18    0.11
  -4   8 -45    0.14    0.10
  -2   7 -45   -0.03    0.09
   7  -5 -45   -0.01    0.07
  -2   7 -45    0.03    0.08
   1   4 -45    0.19    0.10
   1   4 -45    0.17    0.08
  -5   1 -45    0.26    0.11
  -5   4 -45    0.64    0.14
   4   1 -45    0.40    0.11
   4   1 -45    0.56    0.12
  -5   7 -45    0.14    0.10
   7  -2 -45    0.32    0.11
  10  -5 -45    0.44    0.12
  -5  10 -45    0.59    0.16
  -3   9 -45    0.68    0.14
  -3   9 -45    0.31    0.13
   0   6 -45    0.02    0.08
   0   6 -45   -0.03    0.08
   3   3 -45    1.08    0.15
  -6   3 -45    0.95    0.16
   3   3 -45    1.12    0.17
  -6   6 -45    0.20    0.11
   6   0 -45   -0.01    0.07
  -6   9 -45    0.11    0.11
   9  -3 -45    0.06    0.09
  12  -6 -45    0.01    0.10
  -6  12 -45    0.04    0.12
  -4  11 -45    0.06    0.12
  -4  11 -45    0.15    0.13
  -1   8 -45    0.07    0.10
  -1   8 -45    0.08    0.09
   2   5 -45    0.13    0.10
  -7   2 -45    0.10    0.11
   2   5 -45    0.07    0.08
   5   2 -45    0.17    0.10
   5   2 -45    0.15    0.09
  -7   5 -45    0.27    0.12
  -7   8 -45    0.10    0.11
   8  -1 -45   -0.04    0.08
  11  -4 -45   -0.03    0.09
  -7  11 -45    0.16    0.12
  -2  10 -45    0.09    0.12
  -2  10 -45    0.18    0.12
   1   7 -45    0.22    0.12
   1   7 -45    0.04    0.10
   4   4 -45   -0.03    0.09
  -8   4 -45    0.13    0.12
   4   4 -45    0.02    0.10
  -8   7 -45    0.01    0.09
   7   1 -45   -0.06    0.09
  10  -2 -45   -0.08    0.09
  -8  10 -45    0.01    0.11
   0   9 -45    0.03    0.11
   0   9 -45   -0.03    0.10
   3   6 -45    0.66    0.16
   3   6 -45    0.60    0.14
  -9   6 -45    0.14    0.12
   6   3 -45   -0.11    0.09
   6   3 -45    0.02    0.10
  -9   9 -45    0.03    0.10
   9   0 -45    0.00    0.10
   2   8 -45    0.18    0.12
   2   8 -45    0.11    0.13
   5   5 -45    0.42    0.14
 -10   5 -45    0.46    0.16
   5   5 -45    0.45    0.14
 -10   8 -45    0.04    0.12
   8   2 -45   -0.09    0.11
   4   7 -45    0.17    0.14
   4   7 -45    0.03    0.11
 -11   7 -45    0.14    0.13
   7   4 -45   -0.03    0.12
   7   4 -45    0.02    0.11
   6   6 -45   -0.13    0.12
   6   6 -45    0.06    0.13
   0   1 -46    3.35    0.20
   1  -1 -46    3.07    0.20
  -1   0 -46    3.15    0.21
   0   1 -46    3.17    0.20
   1  -1 -46    3.24    0.20
  -1   0 -46    3.00    0.20
  -1   3 -46   -0.06    0.07
   3  -2 -46    0.00    0.06
  -2  -1 -46   -0.01    0.07
  -1   3 -46   -0.01    0.07
  -2   2 -46    0.05    0.07
   0  -2 -46    0.09    0.07
   2   0 -46    0.24    0.09
  -2   2 -46    0.15    0.09
   0  -2 -46    0.13    0.08
   2   0 -46    0.16    0.08
  -2   5 -46    0.74    0.14
  -2   5 -46    0.84    0.16
   5  -3 -46    0.91    0.13
   1   2 -46    0.11    0.08
   1   2 -46    0.00    0.06
   2  -3 -46    0.06    0.07
  -3   1 -46    0.04    0.08
   4  -1 -46    0.09    0.08
  -3   4 -46    0.13    0.09
  -3   4 -46    0.15    0.09
  -3   7 -46    0.03    0.08
   7  -4 -46    0.05    0.08
  -3   7 -46   -0.01    0.08
  -4   0 -46    0.52    0.14
   4  -4 -46    0.49    0.11
   0   4 -46    0.36    0.10
   0   4 -46    0.62    0.14
   3   1 -46    0.21    0.09
   1  -4 -46    0.03    0.07
   3   1 -46    0.20    0.09
  -4   3 -46    0.17    0.10
  -4   6 -46    0.10    0.09
   6  -2 -46    0.03    0.08
  -4   9 -46   -0.12    0.09
  -4   9 -46    0.06    0.10
   9  -5 -46    0.06    0.09
  -1   6 -46    0.03    0.09
  -1   6 -46    0.18    0.10
   6  -5 -46    0.09    0.08
  -5   2 -46    0.67    0.14
   2   3 -46    0.61    0.13
   2   3 -46    0.88    0.14
  -5   5 -46   -0.02    0.09
   5   0 -46    0.00    0.07
  -5   8 -46    0.09    0.11
   8  -3 -46    0.06    0.09
  11  -6 -46    0.04    0.11
  -5  11 -46   -0.04    0.12
  -2   8 -46    0.34    0.12
  -2   8 -46    0.37    0.13
  -6   1 -46   -0.04    0.10
   1   5 -46    0.15    0.10
   1   5 -46    0.03    0.09
   4   2 -46   -0.01    0.08
   4   2 -46    0.04    0.09
  -6   4 -46   -0.09    0.08
  -6   7 -46    0.94    0.17
   7  -1 -46    1.10    0.16
  -6  10 -46    0.01    0.11
  10  -4 -46    0.20    0.11
  -3  10 -46    0.18    0.12
  -3  10 -46   -0.07    0.09
   0   7 -46    0.75    0.15
   0   7 -46    1.14    0.18
   3   4 -46    0.02    0.08
   3   4 -46    0.10    0.09
  -7   3 -46    0.05    0.11
  -7   6 -46    0.76    0.16
   6   1 -46    0.74    0.14
  -7   9 -46    0.08    0.12
   9  -2 -46    0.02    0.09
  -1   9 -46    0.37    0.14
  -1   9 -46    0.58    0.15
   2   6 -46    0.42    0.13
   2   6 -46    0.39    0.13
   5   3 -46   -0.05    0.09
  -8   5 -46   -0.08    0.09
   5   3 -46    0.05    0.09
   8   0 -46    0.91    0.17
  -8   8 -46    0.65    0.17
  -8  11 -46    0.08    0.13
  11  -3 -46   -0.04    0.10
  -2  11 -46    0.04    0.14
  -2  11 -46    0.10    0.13
   1   8 -46    0.61    0.16
   1   8 -46    0.36    0.14
   4   5 -46   -0.10    0.08
   4   5 -46    0.09    0.12
  -9   4 -46    0.03    0.12
  -9   7 -46    0.00    0.11
   7   2 -46    0.18    0.11
  -9  10 -46    0.01    0.12
  10  -1 -46   -0.10    0.10
   0  10 -46    0.10    0.13
   0  10 -46    0.23    0.14
   3   7 -46    0.04    0.11
   3   7 -46   -0.10    0.11
 -10   6 -46    0.20    0.14
   6   4 -46    0.24    0.13
   6   4 -46    0.07    0.10
   9   1 -46   -0.09    0.09
 -10   9 -46   -0.03    0.12
   2   9 -46   -0.13    0.13
   2   9 -46   -0.06    0.12
   5   6 -46   -0.04    0.12
   5   6 -46    0.02    0.11
 -11   8 -46   -0.02    0.11
   8   3 -46   -0.07    0.12
   0  -1 -47    0.02    0.07
   1   0 -47   -0.04    0.07
   1   0 -47    0.10    0.08
   0  -1 -47    0.09    0.08
  -1   1 -47   -0.01    0.08
  -1   1 -47    0.06    0.07
   0   2 -47   -0.01    0.07
   0   2 -47    0.00    0.07
   2  -2 -47    0.09    0.08
  -2   0 -47   -0.09    0.07
  -1  -2 -47    0.06    0.09
  -2   3 -47   -0.02    0.06
  -2   3 -47    0.05    0.09
   3  -1 -47    0.05    0.07
  -1   4 -47    0.25    0.10
  -3  -1 -47    0.07    0.10
   4  -3 -47    0.35    0.10
  -1   4 -47    0.16    0.10
   2   1 -47    0.13    0.08
   2   1 -47    0.22    0.09
  -3   2 -47    0.14    0.09
   1  -3 -47    0.06    0.07
   5  -2 -47    1.27    0.17
  -3   5 -47    1.15    0.16
  -3   5 -47    1.29    0.18
  -2   6 -47    0.50    0.13
   6  -4 -47    0.52    0.13
  -2   6 -47    0.35    0.13
   3  -4 -47    0.12    0.09
  -4   1 -47    0.10    0.11
   1   3 -47    0.13    0.10
   1   3 -47    0.17    0.09
   4   0 -47   -0.01    0.08
  -4   4 -47    0.05    0.10
  -4   7 -47    0.18    0.11
  -4   7 -47    0.15    0.11
   7  -3 -47    0.16    0.10
   8  -5 -47    0.18    0.11
  -3   8 -47    0.32    0.13
  -3   8 -47    0.33    0.13
   0   5 -47    0.06    0.10
   0   5 -47    0.05    0.08
  -5   0 -47   -0.17    0.10
   3   2 -47    1.40    0.18
   3   2 -47    1.52    0.18
  -5   3 -47    1.43    0.20
   6  -1 -47    0.30    0.11
  -5   6 -47    0.32    0.12
  -5   9 -47    0.16    0.12
   9  -4 -47    0.29    0.12
  -4  10 -47    0.59    0.16
  -4  10 -47    0.59    0.15
  -1   7 -47    0.20    0.12
  -1   7 -47    0.20    0.12
  -6   2 -47    0.10    0.11
   2   4 -47    0.48    0.13
   2   4 -47    0.28    0.11
  -6   5 -47    0.15    0.12
   5   1 -47    0.30    0.11
   8  -2 -47    0.16    0.11
  -6   8 -47    0.05    0.11
  11  -5 -47    0.17    0.11
  -6  11 -47    0.12    0.13
  -2   9 -47    0.19    0.12
  -2   9 -47    0.31    0.14
   1   6 -47    0.26    0.13
   1   6 -47    0.17    0.10
  -7   4 -47    0.10    0.11
   4   3 -47    0.13    0.09
   4   3 -47    0.11    0.10
   7   0 -47    0.03    0.09
  -7   7 -47    0.04    0.11
  -7  10 -47   -0.02    0.12
  10  -3 -47   -0.05    0.09
  -3  11 -47    0.04    0.13
  -3  11 -47    0.11    0.13
   0   8 -47    0.12    0.12
   0   8 -47    0.03    0.12
   3   5 -47    0.35    0.12
  -8   3 -47    0.17    0.14
   3   5 -47    0.45    0.13
   6   2 -47    0.10    0.10
  -8   6 -47   -0.04    0.10
   9  -1 -47    0.02    0.09
  -8   9 -47   -0.06    0.12
  -1  10 -47    0.09    0.13
  -1  10 -47    0.07    0.13
   2   7 -47    0.46    0.15
   2   7 -47    0.47    0.15
   5   4 -47    0.14    0.12
  -9   5 -47   -0.10    0.11
   5   4 -47    0.07    0.11
   8   1 -47    0.04    0.11
  -9   8 -47   -0.11    0.11
   1   9 -47    0.08    0.13
   1   9 -47    0.03    0.12
   4   6 -47    0.50    0.16
   4   6 -47    0.58    0.17
 -10   7 -47    0.11    0.13
   7   3 -47    0.13    0.11
 -10  10 -47    0.06    0.14
   3   8 -47    0.06    0.13
   3   8 -47    0.08    0.13
   6   5 -47   -0.08    0.12
   6   5 -47    0.19    0.15
 -11   6 -47    0.09    0.14
   0   0 -48    2.04    0.20
   0   0 -48    2.06    0.20
  -1   2 -48    0.18    0.10
  -1   2 -48    0.01    0.08
  -1  -1 -48    0.02    0.09
   2  -1 -48    0.13    0.09
  -1  -1 -48    0.02    0.10
  -2   1 -48    0.24    0.11
   1   1 -48    0.14    0.09
   1  -2 -48    0.08    0.09
   1   1 -48    0.20    0.10
  -2   1 -48    0.07    0.09
  -2   4 -48    1.06    0.16
   4  -2 -48    1.13    0.15
  -2  -2 -48    0.75    0.16
  -2   4 -48    0.75    0.15
  -3   0 -48    0.42    0.14
   3  -3 -48    0.73    0.13
   0   3 -48    0.58    0.13
   0   3 -48    0.60    0.13
  -3   3 -48    0.26    0.11
   3   0 -48    0.32    0.10
   0  -3 -48    0.28    0.11
  -3   3 -48    0.30    0.12
   6  -3 -48    0.38    0.11
  -3   6 -48    0.51    0.14
  -3   6 -48    0.43    0.15
  -1   5 -48    0.95    0.16
   5  -4 -48    1.15    0.16
  -1   5 -48    0.78    0.16
  -4   2 -48    1.02    0.18
   2   2 -48    0.90    0.15
   2   2 -48    1.19    0.17
   2  -4 -48    0.91    0.14
  -4   5 -48    0.20    0.12
   5  -1 -48    0.30    0.11
   8  -4 -48    0.28    0.11
  -4   8 -48    0.16    0.13
  -4   8 -48    0.22    0.13
  -2   7 -48   -0.01    0.10
   7  -5 -48    0.03    0.09
  -2   7 -48   -0.06    0.10
  -5   1 -48    1.14    0.19
   1   4 -48    1.13    0.17
   1   4 -48    0.85    0.16
  -5   4 -48    0.17    0.12
   4   1 -48    0.25    0.11
   7  -2 -48    0.21    0.11
  -5   7 -48    0.09    0.12
  10  -5 -48    0.25    0.12
  -5  10 -48    0.16    0.13
  -3   9 -48    0.02    0.11
  -3   9 -48    0.04    0.11
   0   6 -48    0.42    0.14
   0   6 -48    0.62    0.16
   3   3 -48    0.28    0.12
   3   3 -48    0.26    0.12
  -6   3 -48    0.14    0.13
   6   0 -48    0.25    0.11
  -6   6 -48    0.45    0.16
  -6   9 -48    0.06    0.12
   9  -3 -48    0.09    0.10
  -4  11 -48    0.02    0.12
  -1   8 -48    0.37    0.14
  -1   8 -48    0.65    0.16
   2   5 -48    0.03    0.11
   2   5 -48    0.05    0.10
  -7   2 -48    0.02    0.12
   5   2 -48    0.30    0.13
  -7   5 -48    0.02    0.12
   8  -1 -48    0.30    0.12
  -7   8 -48    0.24    0.14
  11  -4 -48    0.33    0.13
  -7  11 -48    0.18    0.14
  -2  10 -48    0.05    0.13
  -2  10 -48    0.27    0.14
   1   7 -48    0.57    0.16
   1   7 -48    0.77    0.17
   4   4 -48    0.15    0.12
   4   4 -48    0.19    0.12
  -8   4 -48    0.05    0.13
   7   1 -48    0.51    0.14
  -8   7 -48    0.31    0.14
  10  -2 -48    0.01    0.10
  -8  10 -48    0.06    0.12
   0   9 -48    0.01    0.13
   0   9 -48    0.11    0.13
   3   6 -48   -0.07    0.10
   3   6 -48   -0.02    0.11
   6   3 -48    0.00    0.11
  -9   6 -48   -0.07    0.12
  -9   9 -48   -0.03    0.11
   9   0 -48    0.05    0.12
   2   8 -48    0.05    0.14
   2   8 -48   -0.02    0.13
 -10   5 -48    0.10    0.13
   5   5 -48    0.25    0.14
   5   5 -48    0.33    0.15
 -10   8 -48    0.01    0.12
   8   2 -48    0.15    0.12
   4   7 -48   -0.02    0.12
   4   7 -48    0.22    0.15
 -11   7 -48   -0.12    0.14
   7   4 -48    0.18    0.14
   1  -1 -49    0.15    0.11
  -1   0 -49   -0.14    0.09
  -1   0 -49    0.00    0.11
   0   1 -49    0.05    0.11
   1  -1 -49    0.14    0.11
   0   1 -49    0.17    0.11
  -1   3 -49    0.07    0.11
   3  -2 -49    0.11    0.10
  -1   3 -49    0.02    0.10
  -2  -1 -49   -0.24    0.10
   2   0 -49    0.16    0.10
  -2   2 -49   -0.04    0.11
  -2   2 -49   -0.03    0.09
   2   0 -49    0.03    0.09
   0  -2 -49    0.01    0.10
  -2   5 -49    1.52    0.22
   5  -3 -49    1.20    0.17
  -2   5 -49    1.06    0.17
   1   2 -49    0.11    0.11
  -3   1 -49    0.02    0.12
   1   2 -49    0.26    0.10
   2  -3 -49    0.16    0.10
  -3   4 -49    0.16    0.12
   4  -1 -49    0.31    0.12
  -3   4 -49    0.25    0.14
  -3   7 -49    0.13    0.12
  -3   7 -49    0.22    0.13
   7  -4 -49    0.12    0.10
  -4   0 -49    0.02    0.13
   4  -4 -49   -0.02    0.09
   0   4 -49    0.16    0.11
   0   4 -49    0.23    0.12
   3   1 -49    0.30    0.12
   3   1 -49    0.17    0.10
  -4   3 -49    0.35    0.14
   6  -2 -49    0.93    0.16
  -4   6 -49    0.67    0.17
  -4   9 -49    0.31    0.14
  -4   9 -49    0.38    0.15
   9  -5 -49    0.44    0.14
  -1   6 -49    0.07    0.12
  -1   6 -49    0.05    0.10
   2   3 -49    1.05    0.17
  -5   2 -49    0.85    0.19
   2   3 -49    1.43    0.19
  -5   5 -49    0.02    0.13
   5   0 -49    0.13    0.10
  -5   8 -49    0.12    0.13
   8  -3 -49    0.12    0.10
  -2   8 -49    0.56    0.16
  -2   8 -49    0.32    0.15
  -6   1 -49   -0.13    0.12
   1   5 -49    0.16    0.11
   1   5 -49    0.13    0.11
   4   2 -49    0.82    0.16
   4   2 -49    1.33    0.20
  -6   4 -49    0.88    0.18
  -6   7 -49   -0.08    0.11
   7  -1 -49    0.07    0.11
  -6  10 -49    0.02    0.12
  10  -4 -49    0.08    0.11
  -3  10 -49    0.33    0.15
  -3  10 -49    0.22    0.15
   0   7 -49    0.09    0.13
   0   7 -49    0.14    0.13
   3   4 -49    0.07    0.10
  -7   3 -49    0.08    0.14
   3   4 -49    0.28    0.13
   6   1 -49    0.13    0.12
  -7   6 -49   -0.08    0.11
  -7   9 -49   -0.04    0.12
   9  -2 -49    0.07    0.11
  -1   9 -49    0.22    0.14
  -1   9 -49    0.05    0.12
   2   6 -49    0.38    0.15
   2   6 -49    0.67    0.16
   5   3 -49    0.14    0.12
  -8   5 -49    0.05    0.14
   5   3 -49    0.33    0.13
  -8   8 -49    0.00    0.11
   8   0 -49    0.16    0.12
   1   8 -49    0.15    0.14
   1   8 -49    0.05    0.13
   4   5 -49    0.14    0.14
  -9   4 -49    0.38    0.16
   4   5 -49    0.43    0.16
   7   2 -49    0.14    0.12
  -9   7 -49    0.14    0.14
  -9  10 -49    0.03    0.14
   3   7 -49    0.18    0.14
   3   7 -49    0.44    0.17
 -10   6 -49    0.14    0.16
   6   4 -49    0.40    0.16
   6   4 -49    0.24    0.14
 -10   9 -49    0.08    0.15
   1   0 -50    1.28    0.18
   0  -1 -50    1.54    0.20
   0  -1 -50    1.91    0.21
  -1   1 -50    1.58    0.20
  -1   1 -50    1.16    0.17
   1   0 -50    1.55    0.19
  -2   0 -50    0.64    0.16
   0   2 -50    0.41    0.13
   2  -2 -50    0.33    0.13
   0   2 -50    0.48    0.13
  -2   3 -50   -0.12    0.10
  -2   3 -50   -0.05    0.12
   3  -1 -50    0.04    0.10
  -1  -2 -50   -0.05    0.11
   4  -3 -50    0.46    0.13
  -3  -1 -50    0.55    0.16
  -1   4 -50    0.91    0.18
  -1   4 -50    0.51    0.14
  -3   2 -50    0.06    0.12
   2   1 -50    0.13    0.11
   1  -3 -50    0.17    0.11
   2   1 -50    0.07    0.10
  -3   5 -50    0.02    0.11
  -3   5 -50   -0.08    0.11
   5  -2 -50    0.02    0.10
  -2   6 -50    0.26    0.15
  -2   6 -50    0.21    0.14
   6  -4 -50    0.11    0.10
   1   3 -50    0.49    0.14
   1   3 -50    0.31    0.13
  -4   1 -50    0.69    0.17
   3  -4 -50    0.64    0.14
   4   0 -50    0.17    0.11
  -4   4 -50    0.05    0.12
  -4   7 -50    0.20    0.14
   7  -3 -50    0.17    0.11
  -3   8 -50    0.06    0.13
   8  -5 -50    0.22    0.12
  -3   8 -50    0.02    0.12
   0   5 -50    0.16    0.12
  -5   0 -50   -0.05    0.12
   0   5 -50   -0.07    0.12
   3   2 -50    0.11    0.10
  -5   3 -50    0.24    0.15
   3   2 -50    0.21    0.12
  -5   6 -50    0.28    0.17
   6  -1 -50    0.63    0.15
   9  -4 -50    0.18    0.12
  -5   9 -50    0.09    0.13
  -4  10 -50    0.08    0.14
  -1   7 -50    0.67    0.17
  -1   7 -50    0.74    0.17
   2   4 -50    0.19    0.12
   2   4 -50    0.33    0.13
  -6   2 -50    0.09    0.14
  -6   5 -50    0.31    0.15
   5   1 -50    0.51    0.14
  -6   8 -50    0.19    0.14
   8  -2 -50    0.25    0.12
  -2   9 -50    0.28    0.15
  -2   9 -50    0.23    0.14
   1   6 -50    0.86    0.18
   1   6 -50    0.52    0.16
  -7   4 -50   -0.12    0.13
   4   3 -50    0.14    0.11
   4   3 -50    0.07    0.12
   7   0 -50    1.18    0.19
  -7   7 -50    0.98    0.20
  10  -3 -50    0.04    0.11
  -7  10 -50   -0.08    0.11
   0   8 -50    0.71    0.18
   0   8 -50    0.49    0.16
  -8   3 -50   -0.03    0.13
   3   5 -50    0.07    0.14
   3   5 -50    0.11    0.13
  -8   6 -50    0.16    0.15
   6   2 -50    0.39    0.14
  -8   9 -50    0.15    0.15
   9  -1 -50    0.13    0.12
   2   7 -50    0.60    0.18
   2   7 -50    0.35    0.16
   5   4 -50    0.11    0.13
  -9   5 -50   -0.04    0.13
   5   4 -50    0.12    0.13
   8   1 -50    0.19    0.12
  -9   8 -50   -0.10    0.13
   4   6 -50    0.12    0.14
   4   6 -50   -0.02    0.11
 -10   7 -50   -0.04    0.14
   7   3 -50    0.19    0.14
   0   0 -51   -0.08    0.11
   0   0 -51    0.00    0.11
   2  -1 -51   -0.15    0.10
  -1   2 -51    0.00    0.12
  -1   2 -51   -0.02    0.12
  -1  -1 -51    0.21    0.13
  -1  -1 -51    0.20    0.12
   1   1 -51    0.05    0.11
   1  -2 -51   -0.05    0.10
  -2   1 -51   -0.01    0.12
   1   1 -51    0.08    0.11
  -2   1 -51   -0.12    0.09
  -2  -2 -51    0.32    0.13
  -2   4 -51    0.23    0.14
  -2   4 -51    0.10    0.13
   4  -2 -51    0.46    0.13
   3  -3 -51    0.14    0.12
  -3   0 -51    0.06    0.13
   0   3 -51    0.09    0.13
   0   3 -51    0.08    0.11
   3   0 -51    0.14    0.11
  -3   3 -51   -0.08    0.13
   6  -3 -51    0.78    0.16
  -3   6 -51    0.39    0.14
  -3   6 -51    0.72    0.18
  -1   5 -51    0.39    0.15
  -1   5 -51    0.41    0.16
   5  -4 -51    0.28    0.12
   2   2 -51    0.39    0.14
   2   2 -51    0.68    0.16
  -4   2 -51    0.22    0.14
  -4   5 -51    0.41    0.16
   5  -1 -51    0.46    0.13
  -4   8 -51   -0.12    0.13
   8  -4 -51    0.13    0.11
  -2   7 -51    0.02    0.13
  -2   7 -51    0.02    0.13
   1   4 -51    0.27    0.13
   1   4 -51    0.38    0.16
  -5   1 -51    0.25    0.15
  -5   4 -51    0.71    0.18
   4   1 -51    0.73    0.15
  -5   7 -51    0.13    0.13
   7  -2 -51    0.27    0.12
  10  -5 -51    0.13    0.12
  -5  10 -51    0.08    0.14
  -3   9 -51    0.64    0.17
  -3   9 -51    0.55    0.18
   0   6 -51   -0.01    0.13
   0   6 -51    0.14    0.14
   3   3 -51    0.68    0.16
   3   3 -51    0.71    0.16
  -6   3 -51    0.54    0.17
   6   0 -51    0.17    0.12
  -6   6 -51    0.12    0.14
   9  -3 -51   -0.02    0.10
  -6   9 -51    0.09    0.13
  -1   8 -51    0.00    0.13
  -1   8 -51    0.04    0.13
  -7   2 -51   -0.03    0.12
   2   5 -51   -0.05    0.12
   2   5 -51    0.06    0.13
   5   2 -51    0.22    0.13
  -7   5 -51    0.12    0.14
  -7   8 -51   -0.06    0.13
   8  -1 -51    0.16    0.12
   1   7 -51    0.18    0.15
   1   7 -51    0.31    0.15
   4   4 -51    0.14    0.13
  -8   4 -51    0.13    0.14
   4   4 -51    0.00    0.11
   7   1 -51    0.11    0.12
  -8   7 -51    0.04    0.14
   3   6 -51    0.76    0.17
   3   6 -51    0.49    0.17
   6   3 -51    0.09    0.13
  -9   6 -51    0.03    0.14
 -10   5 -51    0.24    0.16
   5   5 -51    0.15    0.15
   5   5 -51   -0.04    0.12
  -1   0 -52    0.64    0.16
   0   1 -52    0.53    0.15
  -1   0 -52    0.60    0.16
   0   1 -52    0.49    0.14
   1  -1 -52    0.54    0.15
   3  -2 -52   -0.06    0.10
  -2  -1 -52    0.11    0.12
  -1   3 -52    0.12    0.12
  -1   3 -52    0.10    0.13
   2   0 -52    0.13    0.12
  -2   2 -52   -0.13    0.10
   0  -2 -52    0.13    0.12
  -2   2 -52    0.16    0.14
  -2   5 -52    0.61    0.18
  -2   5 -52    0.48    0.15
   5  -3 -52    0.40    0.13
   1   2 -52   -0.03    0.12
   1   2 -52    0.25    0.13
   2  -3 -52    0.19    0.12
  -3   1 -52    0.10    0.13
  -3   4 -52    0.10    0.14
   4  -1 -52    0.51    0.14
  -3   4 -52    0.17    0.13
  -3   7 -52   -0.08    0.12
   7  -4 -52    0.04    0.11
  -3   7 -52    0.31    0.16
  -4   0 -52    1.22    0.20
   0   4 -52    0.77    0.16
   4  -4 -52    0.91    0.16
   0   4 -52    0.95    0.18
  -4   3 -52    0.40    0.16
   3   1 -52    0.43    0.14
  -4   6 -52    0.05    0.14
   6  -2 -52   -0.05    0.10
   9  -5 -52    0.29    0.14
  -4   9 -52    0.28    0.17
  -1   6 -52    0.03    0.13
  -1   6 -52   -0.05    0.12
   2   3 -52    0.46    0.15
  -5   2 -52    0.50    0.17
   2   3 -52    0.53    0.16
  -5   5 -52   -0.06    0.14
   5   0 -52   -0.02    0.10
  -5   8 -52    0.03    0.14
   8  -3 -52    0.01    0.12
  -2   8 -52    0.22    0.15
  -2   8 -52    0.04    0.13
   1   5 -52   -0.03    0.10
  -6   1 -52    0.13    0.13
   1   5 -52    0.10    0.14
   4   2 -52    0.13    0.11
  -6   4 -52    0.08    0.15
   7  -1 -52    0.46    0.14
  -6   7 -52    0.16    0.15
   0   7 -52    0.81    0.19
   0   7 -52    0.78    0.18
   3   4 -52    0.04    0.12
  -7   3 -52    0.13    0.13
   3   4 -52    0.15    0.13
   6   1 -52    0.36    0.13
  -7   6 -52    0.21    0.16
   9  -2 -52   -0.02    0.11
  -7   9 -52    0.04    0.13
  -1   9 -52   -0.03    0.13
  -1   9 -52   -0.08    0.13
   2   6 -52    0.16    0.14
   2   6 -52    0.17    0.14
  -8   5 -52    0.10    0.15
   5   3 -52    0.02    0.12
   8   0 -52    0.29    0.14
  -8   8 -52   -0.01    0.14
   1   8 -52    0.09    0.15
   1   8 -52    0.09    0.15
   4   5 -52    0.30    0.16
  -9   4 -52    0.10    0.13
   4   5 -52    0.22    0.15
  -9   7 -52    0.05    0.14
   7   2 -52   -0.01    0.13
  -1   1 -53   -0.01    0.10
  -1   1 -53    0.02    0.12
   0  -1 -53    0.09    0.11
   1   0 -53   -0.07    0.11
   2  -2 -53   -0.03    0.10
  -2   0 -53   -0.08    0.10
   0   2 -53    0.24    0.13
   0   2 -53   -0.18    0.10
  -2   3 -53    0.12    0.12
  -2   3 -53   -0.05    0.12
   3  -1 -53    0.13    0.11
  -1   4 -53    0.23    0.14
  -1   4 -53    0.15    0.14
  -3  -1 -53    0.34    0.14
   4  -3 -53    0.48    0.14
   2   1 -53   -0.05    0.11
   1  -3 -53    0.10    0.11
   2   1 -53   -0.11    0.10
  -3   2 -53   -0.02    0.12
  -3   5 -53    0.75    0.16
  -3   5 -53    0.70    0.18
   5  -2 -53    0.68    0.15
  -2   6 -53    0.34    0.17
  -2   6 -53    0.44    0.15
   6  -4 -53    0.28    0.13
  -4   1 -53    0.26    0.14
   1   3 -53    0.05    0.12
   1   3 -53    0.23    0.14
   4   0 -53   -0.06    0.10
  -4   4 -53   -0.20    0.12
   7  -3 -53    0.04    0.11
  -4   7 -53    0.20    0.14
  -3   8 -53    0.12    0.13
  -3   8 -53    0.21    0.16
   0   5 -53    0.02    0.13
   0   5 -53   -0.03    0.12
   3   2 -53    0.96    0.18
   3   2 -53    0.66    0.16
  -5   3 -53    0.93    0.19
   6  -1 -53   -0.02    0.11
  -5   6 -53    0.29    0.15
   9  -4 -53    0.10    0.12
  -5   9 -53   -0.05    0.13
  -1   7 -53    0.12    0.15
  -1   7 -53    0.04    0.12
   2   4 -53    0.25    0.15
  -6   2 -53    0.38    0.15
   2   4 -53    0.19    0.13
  -6   5 -53    0.23    0.14
   5   1 -53    0.15    0.12
  -6   8 -53    0.08    0.14
   8  -2 -53    0.06    0.12
  -2   9 -53    0.07    0.14
  -2   9 -53    0.22    0.15
   1   6 -53    0.31    0.16
   1   6 -53    0.12    0.14
   4   3 -53    0.07    0.13
   4   3 -53    0.12    0.15
  -7   4 -53    0.11    0.15
  -7   7 -53   -0.01    0.13
   7   0 -53    0.12    0.13
   0   8 -53    0.09    0.14
   0   8 -53    0.03    0.14
  -8   3 -53    0.45    0.17
   3   5 -53    0.24    0.15
   3   5 -53   -0.05    0.13
  -8   6 -53    0.08    0.13
   6   2 -53    0.05    0.11
   2   7 -53    0.18    0.16
   2   7 -53    0.13    0.15
  -9   5 -53    0.25    0.16
   5   4 -53    0.03    0.13
   0   0 -54    1.21    0.17
   0   0 -54    1.24    0.22
  -1   2 -54    0.16    0.12
   2  -1 -54    0.21    0.11
  -1   2 -54    0.22    0.14
  -1  -1 -54    0.12    0.12
   1  -2 -54    0.24    0.12
   1   1 -54    0.27    0.12
   1   1 -54    0.36    0.13
  -2   1 -54    0.19    0.13
   4  -2 -54   -0.06    0.09
  -2   4 -54    0.15    0.12
  -2  -2 -54    0.36    0.12
  -2   4 -54    0.07    0.12
   0   3 -54   -0.12    0.10
  -3   0 -54    0.07    0.11
   0   3 -54    0.15    0.12
   3  -3 -54   -0.03    0.10
  -3   3 -54   -0.01    0.12
   3   0 -54   -0.13    0.09
   6  -3 -54   -0.15    0.09
  -3   6 -54    0.00    0.11
  -3   6 -54    0.04    0.13
  -1   5 -54    0.20    0.15
   5  -4 -54    0.12    0.11
  -1   5 -54    0.22    0.13
  -4   2 -54    0.01    0.12
   2   2 -54    0.28    0.13
   2   2 -54    0.06    0.11
  -4   5 -54    0.04    0.14
   5  -1 -54    0.06    0.11
  -4   8 -54   -0.10    0.11
   8  -4 -54   -0.02    0.11
  -2   7 -54   -0.04    0.12
  -2   7 -54    0.20    0.14
   1   4 -54    0.27    0.14
   1   4 -54    0.33    0.14
  -5   1 -54    0.38    0.15
   4   1 -54   -0.04    0.10
  -5   4 -54   -0.06    0.11
   7  -2 -54    0.12    0.12
  -5   7 -54    0.26    0.15
  -3   9 -54   -0.04    0.12
  -3   9 -54    0.00    0.13
   0   6 -54    0.20    0.14
   0   6 -54    0.23    0.15
   3   3 -54    0.01    0.13
   3   3 -54   -0.05    0.09
  -6   3 -54   -0.10    0.11
  -6   6 -54    0.59    0.18
   6   0 -54    0.13    0.12
  -6   9 -54   -0.07    0.13
  -1   8 -54    0.14    0.16
  -1   8 -54    0.30    0.16
   2   5 -54    0.08    0.13
  -7   2 -54    0.03    0.12
   2   5 -54    0.01    0.13
   5   2 -54   -0.01    0.12
  -7   5 -54    0.12    0.13
   8  -1 -54    0.20    0.14
  -7   8 -54   -0.03    0.14
   1   7 -54    0.34    0.16
   1   7 -54    0.09    0.15
   4   4 -54   -0.02    0.14
  -8   4 -54    0.05    0.13
   4   4 -54   -0.04    0.12
  -8   7 -54    0.05    0.14
   7   1 -54    0.33    0.14
   3   6 -54    0.14    0.15
  -9   6 -54    0.12    0.14
   0   1 -55   -0.12    0.09
   0   1 -55   -0.06    0.10
  -1   0 -55    0.08    0.10
  -1   0 -55   -0.09    0.09
   1  -1 -55   -0.12    0.09
  -1   3 -55    0.00    0.11
   3  -2 -55   -0.17    0.08
  -1   3 -55   -0.09    0.09
  -2  -1 -55    0.00    0.09
   0  -2 -55   -0.11    0.09
  -2   2 -55    0.01    0.11
  -2   2 -55    0.03    0.10
   2   0 -55   -0.14    0.08
  -2   5 -55    0.28    0.14
   5  -3 -55    0.29    0.12
  -2   5 -55    0.40    0.14
   1   2 -55   -0.20    0.09
   1   2 -55    0.00    0.10
  -3   1 -55    0.06    0.10
   2  -3 -55   -0.09    0.09
   4  -1 -55   -0.08    0.10
  -3   4 -55    0.11    0.13
  -3   7 -55    0.03    0.14
   7  -4 -55   -0.01    0.11
  -3   7 -55    0.01    0.11
   0   4 -55   -0.09    0.10
  -4   0 -55   -0.01    0.10
   0   4 -55   -0.15    0.10
  -4   3 -55    0.30    0.14
   3   1 -55    0.02    0.10
  -4   6 -55    0.33    0.15
   6  -2 -55    0.30    0.13
  -1   6 -55   -0.20    0.10
  -1   6 -55   -0.03    0.12
  -5   2 -55    0.27    0.14
   2   3 -55    0.27    0.13
   2   3 -55    0.27    0.15
   5   0 -55   -0.21    0.09
  -5   5 -55   -0.05    0.11
  -5   8 -55   -0.05    0.13
   8  -3 -55   -0.12    0.11
  -2   8 -55    0.26    0.15
  -2   8 -55    0.25    0.17
  -6   1 -55    0.07    0.13
   1   5 -55   -0.22    0.10
   1   5 -55    0.00    0.13
   4   2 -55    0.32    0.14
  -6   4 -55    0.61    0.16
   7  -1 -55   -0.12    0.10
  -6   7 -55   -0.13    0.13
   0   7 -55   -0.16    0.09
   0   7 -55   -0.22    0.12
   3   4 -55   -0.12    0.11
   3   4 -55   -0.16    0.11
  -7   3 -55    0.12    0.14
  -7   6 -55   -0.08    0.13
   6   1 -55    0.03    0.12
   2   6 -55    0.29    0.15
   2   6 -55    0.20    0.15
  -8   5 -55   -0.07    0.11
   5   3 -55   -0.04    0.12
   1   0 -56    0.71    0.15
  -1   1 -56    0.74    0.15
  -1   1 -56    0.76    0.16
   0  -1 -56    0.54    0.13
   0   2 -56    0.02    0.10
   2  -2 -56    0.00    0.10
  -2   0 -56    0.15    0.11
   0   2 -56    0.06    0.11
  -2   3 -56   -0.08    0.10
  -2   3 -56   -0.06    0.09
   3  -1 -56   -0.13    0.08
  -1   4 -56    0.16    0.12
  -1   4 -56    0.25    0.12
   4  -3 -56    0.24    0.12
  -3  -1 -56    0.35    0.13
   1  -3 -56    0.03    0.09
   2   1 -56   -0.07    0.09
  -3   2 -56    0.02    0.10
  -3   5 -56    0.00    0.10
  -3   5 -56    0.14    0.13
   5  -2 -56   -0.07    0.09
  -2   6 -56    0.07    0.12
   6  -4 -56    0.03    0.11
  -2   6 -56   -0.06    0.12
   1   3 -56    0.08    0.10
  -4   1 -56    0.50    0.15
   1   3 -56    0.17    0.13
   4   0 -56   -0.02    0.09
  -4   4 -56    0.06    0.12
  -4   7 -56   -0.18    0.11
   7  -3 -56   -0.13    0.10
  -3   8 -56    0.02    0.12
  -3   8 -56   -0.09    0.13
   0   5 -56   -0.07    0.12
   0   5 -56   -0.06    0.11
  -5   3 -56    0.05    0.11
   3   2 -56   -0.08    0.11
  -5   6 -56   -0.01    0.13
   6  -1 -56   -0.10    0.10
  -1   7 -56    0.13    0.14
  -1   7 -56    0.11    0.15
   2   4 -56   -0.08    0.10
   2   4 -56   -0.03    0.13
  -6   2 -56    0.04    0.12
  -6   5 -56   -0.07    0.12
   5   1 -56   -0.12    0.10
  -6   8 -56   -0.07    0.13
   1   6 -56    0.04    0.14
   1   6 -56    0.04    0.14
  -7   4 -56    0.04    0.13
   4   3 -56   -0.19    0.10
   7   0 -56    0.10    0.13
  -7   7 -56    0.32    0.16
   3   5 -56   -0.14    0.12
   3   5 -56   -0.19    0.11
  -8   3 -56    0.02    0.13
  -8   6 -56   -0.02    0.12
   0   0 -57    0.08    0.09
   2  -1 -57   -0.15    0.07
  -1   2 -57    0.03    0.09
  -1   2 -57    0.00    0.11
   1  -2 -57    0.10    0.10
  -2   1 -57    0.01    0.10
   1   1 -57    0.05    0.09
  -2   4 -57    0.19    0.13
   4  -2 -57    0.02    0.10
  -2   4 -57    0.19    0.10
   3  -3 -57   -0.03    0.10
   0   3 -57   -0.05    0.10
   0   3 -57   -0.01    0.10
  -3   0 -57    0.05    0.11
   3   0 -57   -0.08    0.08
  -3   3 -57   -0.03    0.11
   6  -3 -57    0.30    0.13
  -3   6 -57    0.47    0.14
  -3   6 -57    0.49    0.16
  -1   5 -57   -0.01    0.09
  -1   5 -57    0.01    0.12
  -4   2 -57    0.23    0.13
   2   2 -57    0.11    0.11
   5  -1 -57   -0.03    0.10
  -4   5 -57    0.01    0.13
  -2   7 -57    0.07    0.12
  -2   7 -57    0.09    0.14
   1   4 -57    0.09    0.13
   1   4 -57   -0.04    0.10
  -5   1 -57    0.13    0.12
  -5   4 -57    0.11    0.12
   4   1 -57   -0.08    0.10
   7  -2 -57   -0.10    0.11
  -5   7 -57   -0.03    0.12
   0   6 -57   -0.09    0.11
   0   6 -57   -0.23    0.12
  -6   3 -57    0.32    0.15
   3   3 -57    0.06    0.12
  -6   6 -57   -0.04    0.12
   6   0 -57   -0.15    0.10
   2   5 -57    0.00    0.14
  -7   2 -57    0.08    0.12
   2   5 -57   -0.07    0.11
   5   2 -57   -0.05    0.11
  -7   5 -57    0.02    0.13
  -1   0 -58    0.56    0.14
   0   1 -58    0.32    0.14
  -1   0 -58    0.34    0.14
   0   1 -58    0.64    0.14
   1  -1 -58    0.58    0.14
  -1   3 -58    0.05    0.10
   3  -2 -58   -0.04    0.10
  -1   3 -58    0.12    0.11
   2   0 -58    0.16    0.10
   0  -2 -58    0.04    0.10
  -2   2 -58   -0.01    0.08
  -2   2 -58   -0.04    0.10
   5  -3 -58    0.33    0.13
  -2   5 -58    0.27    0.15
  -2   5 -58    0.18    0.12
   2  -3 -58   -0.03    0.09
   1   2 -58    0.04    0.11
  -3   1 -58    0.02    0.10
   1   2 -58   -0.10    0.09
   4  -1 -58   -0.06    0.10
  -3   4 -58    0.02    0.12
  -3   7 -58   -0.01    0.13
  -3   7 -58    0.18    0.13
   7  -4 -58   -0.06    0.11
   0   4 -58    0.27    0.14
   0   4 -58    0.41    0.15
  -4   0 -58    0.47    0.15
   3   1 -58   -0.05    0.09
  -4   3 -58   -0.05    0.11
  -4   6 -58    0.07    0.12
   6  -2 -58   -0.05    0.10
  -1   6 -58    0.03    0.14
  -1   6 -58    0.00    0.11
   2   3 -58    0.18    0.12
  -5   2 -58    0.56    0.16
   2   3 -58    0.29    0.15
  -5   5 -58   -0.12    0.11
   5   0 -58   -0.15    0.09
   1   5 -58    0.03    0.14
   1   5 -58   -0.06    0.11
   4   2 -58   -0.08    0.10
  -6   4 -58   -0.03    0.11
   3   4 -58   -0.02    0.12
   3   4 -58   -0.06    0.13
  -7   3 -58    0.01    0.13
  -1   1 -59    0.01    0.10
   1   0 -59   -0.06    0.09
  -1   1 -59    0.02    0.11
   0  -1 -59    0.08    0.10
   0   2 -59   -0.02    0.10
   2  -2 -59    0.06    0.11
  -2   0 -59   -0.03    0.11
   0   2 -59   -0.02    0.10
   3  -1 -59    0.00    0.10
  -2   3 -59    0.02    0.10
  -2   3 -59   -0.04    0.12
  -1   4 -59   -0.06    0.12
  -3  -1 -59    0.14    0.13
  -1   4 -59    0.30    0.13
   4  -3 -59    0.20    0.12
   2   1 -59   -0.01    0.09
  -3   2 -59   -0.01    0.11
  -3   5 -59    0.28    0.15
   5  -2 -59    0.28    0.13
  -2   6 -59    0.03    0.12
  -2   6 -59   -0.06    0.11
   1   3 -59    0.05    0.11
   1   3 -59    0.04    0.12
  -4   1 -59    0.08    0.14
  -4   4 -59   -0.06    0.11
   4   0 -59    0.07    0.11
   0   5 -59    0.04    0.12
   0   5 -59    0.04    0.14
  -5   3 -59    0.42    0.16
   3   2 -59    0.29    0.13
   6  -1 -59   -0.09    0.10
  -5   6 -59    0.17    0.16
  -6   2 -59    0.04    0.13
   2   4 -59    0.09    0.14
   2   4 -59   -0.06    0.12
   5   1 -59    0.01    0.11
  -6   5 -59    0.13    0.14
   0   0 -60    0.68    0.16
  -1   2 -60    0.07    0.11
   2  -1 -60    0.04    0.11
  -1   2 -60    0.02    0.12
   1  -2 -60    0.14    0.11
  -2   1 -60    0.11    0.13
   1   1 -60    0.01    0.11
   4  -2 -60    0.16    0.11
  -2   4 -60    0.14    0.12
  -2   4 -60    0.45    0.16
   0   3 -60    0.29    0.14
   3  -3 -60    0.07    0.11
  -3   0 -60    0.04    0.11
   0   3 -60    0.20    0.12
   3   0 -60    0.09    0.12
  -3   3 -60    0.10    0.12
  -3   6 -60    0.05    0.13
  -3   6 -60    0.02    0.13
  -1   5 -60    0.08    0.13
  -1   5 -60    0.19    0.13
   2   2 -60    0.17    0.11
  -4   2 -60    0.10    0.13
  -4   5 -60   -0.12    0.13
   5  -1 -60    0.00    0.10
   1   4 -60    0.12    0.14
  -5   1 -60    0.12    0.14
   1   4 -60    0.23    0.13
  -5   4 -60    0.01    0.13
   4   1 -60    0.05    0.12
  -6   3 -60    0.17    0.15
   0   1 -61    0.08    0.11
   1  -1 -61    0.03    0.10
  -1   3 -61   -0.17    0.11
   3  -2 -61   -0.01    0.11
  -1   3 -61    0.03    0.10
   2   0 -61    0.03    0.11
  -2   2 -61    0.01    0.12
  -2   5 -61    0.29    0.15
  -2   5 -61    0.22    0.13
   5  -3 -61    0.23    0.13
   1   2 -61   -0.03    0.11
  -3   1 -61   -0.05    0.13
   4  -1 -61    0.19    0.13
  -3   4 -61   -0.07    0.13
   0   4 -61   -0.02    0.12
   0   4 -61   -0.13    0.11
  -4   0 -61    0.19    0.14
  -4   3 -61    0.14    0.14
   3   1 -61    0.10    0.12
   2   3 -61    0.09    0.12
  -5   2 -61   -0.09    0.13
  -1   1 -62    0.12    0.12
   0  -1 -62    0.25    0.12
   1   0 -62    0.10    0.11
   0   2 -62    0.08    0.11
   2  -2 -62   -0.08    0.09
  -2   3 -62    0.12    0.13
   3  -1 -62    0.04    0.11
  -2   3 -62    0.02    0.13
   4  -3 -62    0.20    0.14
  -1   4 -62    0.28    0.13
  -1   4 -62    0.28    0.16
   2   1 -62   -0.05    0.10
  -3   2 -62    0.05    0.13
  -4   1 -62    0.33    0.15
   1   3 -62    0.27    0.14
   0   0 -63   -0.06    0.10
  -1   2 -63    0.00    0.13
   2  -1 -63   -0.06    0.12
  -1   2 -63   -0.06    0.11
  -2   1 -63   -0.03    0.12
   1  -2 -63    0.05    0.12
   1   1 -63   -0.01    0.12
   0   3 -63   -0.04    0.13
  -3   3 -63   -0.02    0.13
   0   1 -64    0.09    0.13
   1  -1 -64   -0.06    0.11
   0   0   0    0.00    0.00
;
_shelx_hkl_checksum               10520
_olex2_submission_special_instructions 'No special instructions were received'
